# Supplementary material for: In Silico Study of Physicochemical Characteristics and Anticancer Potential of Peptides Derived from Salvia Hispanica
Source: Research Square preprint supplement (doi:10.21203/rs.3.rs-1456505/v1), 2022-03-21
Supplement: Supplementary file 1 [file 864634b3440628927f4394fb.docx]

***In silico*study of physicochemical characteristics and anticancer potential of peptides derived *from Salvia hispanica***

Nidia del Carmen Quintal Bojorquez1 (ORCID ID: [0000-0002-8260-294X](https://orcid.org/0000-0002-8260-294X)), Luis Fernando Morales Mendoza1 (ORCID ID: [0000-0003-1747-6454](https://orcid.org/0000-0003-1747-6454)), Sergio Hidalgo Figueroa2 (ORCID ID: [0000-0002-4344-642X](https://orcid.org/0000-0002-4344-642X)), Alan Javier Hernández Álvarez3 (ORCID ID: [0000-0003-4154-8630](https://orcid.org/0000-0003-4154-8630)), Maira Rubi Segura Campos1* (ORCID ID: [0000-0002-7664-6647](https://orcid.org/0000-0002-7664-6647))

1Facultad de Ingeniería Química, Universidad Autónoma de Yucatán, Periférico Norte Km. 33.5, Tablaje Catastral 13615, Colonia Chuburná de Hidalgo Inn. Mérida, Yucatán, México. C.P. 97203. Phone: 52 9999 946-09-56, Fax. 52 999 946-09-94.

2CONACyT, Instituto Potosino de Investigación Científica y Tecnológica, San Luis Potosí 78216, México.

3School of Food Science & Nutrition, University of Leeds, LS2 9JT, Leeds, United Kingdom

***Corresponding author:** [maira.segura@correo.uady.mx](mailto:maira.segura@correo.uady.mx).

# **Table 1.** *Reported* peptide sequences derived from the protein fraction <1 kDa of *S. hispanica* that have been found in other organisms along with their physicochemical properties, and allergenicity and toxicity predictions.

| **No.** | **Peptide sequence** | **Molecular weight (Da)** | **Lenght** | **Net charge** | **Hydrophobicity** | **Toxicity** | **Allergenicity** | **Organism** | **Protein accession** |
| --- | --- | --- | --- | --- | --- | --- | --- | --- | --- |
| **1** | APQGSKGEETFHN | 1400.6321 | 13 | -0.9 | 23.08 | Non-toxin | Probable non-allergen | *Salvia splendens* | tr|A0A4D8ZBN4|A0A4D8ZBN4_SALSN |
| **2** | SVNDLNHQSN | 1126.5004 | 10 | -0.9 | 20 | Non-toxin | Probable allergen | *Salvia splendens* | tr|A0A4D8ZBN4|A0A4D8ZBN4_SALSN |
| tr|A0A4D9B354|A0A4D9B354_SALSN |
| **3** | AKVQIVDHSGQT | 1282.6517 | 12 | 0.1 | 33.33 | Non-toxin | Probable allergen | *Salvia splendens* | tr|A0A4D8ZBN4|A0A4D8ZBN4_SALSN |
| **4** | MMNDRVSQGD | 1151.4700 | 10 | -1 | 30 | Non-toxin | Probable allergen | *Salvia splendens* | tr|A0A4D8ZBN4|A0A4D8ZBN4_SALSN |
| tr|A0A4D9B354|A0A4D9B354_SALSN |
| **5** | NDLNHQSNQLDEK | 1553.7070 | 13 | -1.9 | 15.38 | Non-toxin | Probable non-allergen | *Salvia splendens* | tr|A0A4D8ZBN4|A0A4D8ZBN4_SALSN |
| **6** | LAGSAPQGSKGEETFHN | 1728.8066 | 17 | -0.9 | 29.41 | Non-toxin | Probable non-allergen | *Salvia splendens* | tr|A0A4D8ZBN4|A0A4D8ZBN4_SALSN |
| **7** | LAGSAPQGSKGEE | 1229.5887 | 13 | -1 | 30.77 | Non-toxin | Probable non-allergen | *Salvia splendens* | tr|A0A4D8ZBN4|A0A4D8ZBN4_SALSN |
| **8** | NDRVSQGDM | 1020.4294 | 9 | -1 | 22.22 | Non-toxin | Probable allergen | *Salvia splendens* | tr|A0A4D8ZBN4|A0A4D8ZBN4_SALSN |
| tr|A0A4D9B354|A0A4D9B354_SALSN |
| **9** | YLAGSAPQGSKGEET | 1493.6997 | 15 | -1 | 26.67 | Non-toxin | Probable non-allergen | *Salvia splendens* | tr|A0A4D8ZBN4|A0A4D8ZBN4_SALSN |
| **10** | SVNDLNHQSNQ | 1254.5588 | 11 | -0.9 | 18.18 | Non-toxin | Probable allergen | *Salvia splendens* | tr|A0A4D8ZBN4|A0A4D8ZBN4_SALSN |
| tr|A0A4D9B354|A0A4D9B354_SALSN |
| **11** | MMNDRVSQGDM | 1298.5054 | 11 | -1 | 36.36 | Non-toxin | Probable allergen | *Salvia splendens* | tr|A0A4D8ZBN4|A0A4D8ZBN4_SALSN |
| tr|A0A4D8ZBN4|A0A4D8ZBN4_SALSN |
| **12** | SVNDLNHQSNQLDEK | 1739.8074 | 15 | -1.9 | 20 | Non-toxin | Probable non-allergen | *Salvia splendens* | tr|A0A4D8ZBN4|A0A4D8ZBN4_SALSN |
| **13** | ISAVQPRNQ | 1011.5461 | 9 | 1 | 44.44 | Non-toxin | Probable non-allergen | *Salvia splendens* | tr|A0A4D8ZBN4|A0A4D8ZBN4_SALSN |
| **14** | LAGSAPQGSKGEET | 1330.6365 | 14 | -1 | 28.57 | Non-toxin | Probable non-allergen | *Salvia splendens* | tr|A0A4D8ZBN4|A0A4D8ZBN4_SALSN |
| **15** | YLAGSAPQGSKGEETFHN | 1891.8700 | 18 | -0.9 | 27.78 | Non-toxin | Probable non-allergen | *Salvia splendens* | tr|A0A4D8ZBN4|A0A4D8ZBN4_SALSN |
| **16** | VQIVDHSGQT | 1083.5197 | 10 | -0.9 | 30 | Non-toxin | Probable non-allergen | *Salvia splendens* | tr|A0A4D8ZBN4|A0A4D8ZBN4_SALSN |
| **17** | MNDRVSQGDM | 1167.4648 | 10 | -1 | 30 | Non-toxin | Probable allergen | *Salvia splendens* | tr|A0A4D8ZBN4|A0A4D8ZBN4_SALSN |
| tr|A0A4D9B354|A0A4D9B354_SALSN |
| **18** | RMQSTEEERGL | 1334.6249 | 11 | -1 | 18.18 | Non-toxin | Probable non-allergen | *Salvia splendens* | tr|A0A4D8ZBN4|A0A4D8ZBN4_SALSN |
| **19** | GDVIALPPGAVHW | 1330.7034 | 13 | -0.9 | 69.23 | Non-toxin | Probable allergen | *Salvia splendens* | tr|A0A4D8ZBN4|A0A4D8ZBN4_SALSN |
| tr|A0A4D9B354|A0A4D9B354_SALSN |
| **20** | LSPHWAKDGHT | 1247.6047 | 11 | 0.2 | 36.36 | Non-toxin | Probable allergen | *Salvia splendens* | tr|A0A4D8ZBN4|A0A4D8ZBN4_SALSN |
| **21** | RTNIENQRDADI | 1443.7065 | 12 | -1 | 25 | Non-toxin | Probable allergen | *Salvia splendens* | tr|A0A4D8ZBN4|A0A4D8ZBN4_SALSN |
| tr|A0A4D9B354|A0A4D9B354_SALSN |
| **22** | AKVQIVDHSGQ | 1181.6040 | 11 | 0.1 | 36.36 | Non-toxin | Probable allergen | *Salvia splendens* | tr|A0A4D8ZBN4|A0A4D8ZBN4_SALSN |
| **23** | RMQSTEEERGLS | 1421.6569 | 12 | -1 | 16.67 | Non-toxin | Probable non-allergen | *Salvia splendens* | tr|A0A4D8ZBN4|A0A4D8ZBN4_SALSN |
| **24** | MQSTEEERGLS | 1265.5558 | 11 | -2 | 18.18 | Non-toxin | Probable non-allergen | *Salvia splendens* | tr|A0A4D8ZBN4|A0A4D8ZBN4_SALSN |
| **25** | MMNDRVSQ | 995.4164 | 8 | 0 | 37.5 | Non-toxin | Probable allergen | *Salvia splendens* | tr|A0A4D8ZBN4|A0A4D8ZBN4_SALSN |
| tr|A0A4D9B354|A0A4D9B354_SALSN |
| **26** | ISAVQPRN | 883.4875 | 8 | 1 | 50 | Non-toxin | Probable allergen | *Salvia splendens* | tr|A0A4D8ZBN4|A0A4D8ZBN4_SALSN |
| **27** | IDMSAEKGT | 966.4328 | 9 | -1 | 33.33 | Non-toxin | Probable non-allergen | *Salvia splendens* | tr|A0A4D8ZBN4|A0A4D8ZBN4_SALSN |
| **28** | SSESEQQGQKRD | 1377.6121 | 12 | -1 | 0 | Non-toxin | Probable allergen | *Salvia splendens* | tr|A0A4D8ZBN4|A0A4D8ZBN4_SALSN |
| **29** | QSTEEERGLS | 1134.5153 | 10 | -2 | 10 | Non-toxin | Probable non-allergen | *Salvia splendens* | tr|A0A4D8ZBN4|A0A4D8ZBN4_SALSN |
| **30** | IENQRDADI | 1072.5149 | 9 | -2 | 33.33 | Non-toxin | Probable allergen | *Salvia splendens* | tr|A0A4D8ZBN4|A0A4D8ZBN4_SALSN |
| tr|A0A4D9B354|A0A4D9B354_SALSN |
| **31** | IALPPGAVHW | 1059.5865 | 10 | 0.1 | 80 | Non-toxin | Probable non-allergen | *Salvia splendens* | tr|A0A4D8ZBN4|A0A4D8ZBN4_SALSN |
| tr|A0A4D9B354|A0A4D9B354_SALSN |
| **32** | SAPQGSKGEETFHN | 1487.6641 | 14 | -0.9 | 21.43 | Non-toxin | Probable non-allergen | *Salvia splendens* | tr|A0A4D8ZBN4|A0A4D8ZBN4_SALSN |
| **33** | VQDNSNNANQLDQNPR | 1825.8303 | 16 | -1 | 25 | Non-toxin | Probable non-allergen | *Salvia splendens* | tr|A0A4D9B036|A0A4D9B036_SALSN |
| **34** | VVQDNSNNANQLDQNPRS | 2011.9308 | 18 | -1 | 27.78 | Non-toxin | Probable non-allergen | *Salvia splendens* | tr|A0A4D9B036|A0A4D9B036_SALSN |
| **35** | VVQDNSNNANQLDQNPR | 1924.8987 | 17 | -1 | 29.41 | Non-toxin | Probable non-allergen | *Salvia splendens* | tr|A0A4D9B036|A0A4D9B036_SALSN |
| **36** | GPIVIVEKELQ | 1223.7125 | 11 | -1 | 54.55 | Non-toxin | Probable non-allergen | *Salvia splendens* | tr|A0A4D9B036|A0A4D9B036_SALSN |
| **37** | VQDNSNNANQLDQNPRS | 1912.8623 | 17 | -1 | 23.53 | Non-toxin | Probable non-allergen | *Salvia splendens* | tr|A0A4D9B036|A0A4D9B036_SALSN |
| **38** | NANQLDQNPRS | 1255.5905 | 11 | 0 | 27.27 | Non-toxin | Probable allergen | *Salvia splendens* | tr|A0A4D9B036|A0A4D9B036_SALSN |
| **39** | QDNSNNANQLDQNPR | 1726.7618 | 15 | -1 | 20 | Non-toxin | Probable non-allergen | *Salvia splendens* | tr|A0A4D9B036|A0A4D9B036_SALSN |
| **40** | NNANQLDQNPRS | 1369.6334 | 12 | 0 | 25 | Non-toxin | Probable allergen | *Salvia splendens* | tr|A0A4D9B036|A0A4D9B036_SALSN |
| **41** | QDNSNNANQLDQNPRS | 1813.7939 | 16 | -1 | 18.75 | Non-toxin | Probable non-allergen | *Salvia splendens* | tr|A0A4D9B036|A0A4D9B036_SALSN |
| **42** | GQQHEMGN | 899.3556 | 8 | -0.9 | 12.5 | Non-toxin | Probable allergen | *Salvia splendens* | tr|A0A4D9B036|A0A4D9B036_SALSN |
| **43** | DERGPIVIVEKELQ | 1623.8832 | 14 | -2 | 42.86 | Non-toxin | Probable non-allergen | *Salvia splendens* | tr|A0A4D9B036|A0A4D9B036_SALSN |
| **44** | ANQLDQNPR | 1054.5155 | 9 | 0 | 33.33 | Non-toxin | Probable non-allergen | *Salvia splendens* | tr|A0A4D9B036|A0A4D9B036_SALSN |
| tr|A0A4D9ABF2|A0A4D9ABF2_SALSN |
| **45** | KIRENINNPSRA | 1410.7692 | 12 | 2 | 33.33 | Non-toxin | Probable non-allergen | *Salvia splendens* | tr|A0A4D9B036|A0A4D9B036_SALSN |
| **46** | AFDVDEETARK | 1279.6044 | 11 | -2 | 36.36 | Non-toxin | Probable allergen | *Salvia splendens* | tr|A0A4D9B036|A0A4D9B036_SALSN |
| **47** | IAQQQEQMK | 1102.5441 | 9 | 0 | 33.33 | Non-toxin | Probable non-allergen | *Salvia splendens* | tr|A0A4D9B036|A0A4D9B036_SALSN |
| **48** | DVDEETARKL | 1174.5829 | 10 | -2 | 30 | Non-toxin | Probable allergen | *Salvia splendens* | tr|A0A4D9B036|A0A4D9B036_SALSN |
| **49** | RVESEGGVSE | 1047.4833 | 10 | -2 | 20 | Non-toxin | Probable non-allergen | *Salvia splendens* | tr|A0A4D9B036|A0A4D9B036_SALSN |
| **50** | IRAGDAHWT | 1025.5043 | 9 | 0.1 | 44.44 | Non-toxin | Probable allergen | *Salvia splendens* | tr|A0A4D9B036|A0A4D9B036_SALSN |
| **51** | QLDQNPRS | 956.4675 | 8 | 0 | 25 | Non-toxin | Probable non-allergen | *Salvia splendens* | tr|A0A4D9B036|A0A4D9B036_SALSN |
| tr|A0A4D9ABF2|A0A4D9ABF2_SALSN |
| **52** | GPIVIVEKEL | 1095.6539 | 10 | -1 | 60 | Non-toxin | Probable non-allergen | *Salvia splendens* | tr|A0A4D9B036|A0A4D9B036_SALSN |
| **53** | YLKQGDVIAI | 1118.6335 | 10 | 0 | 50 | Non-toxin | Probable allergen | *Salvia splendens* | tr|A0A4D9B036|A0A4D9B036_SALSN |
| **54** | VVQDNSNN | 888.3937 | 8 | -1 | 25 | Non-toxin | Probable non-allergen | *Salvia splendens* | tr|A0A4D9B036|A0A4D9B036_SALSN |
| **55** | VSMLDIGNDNNQLDFK | 1821.8567 | 16 | -2 | 37.5 | Non-toxin | Probable non-allergen | *Salvia splendens* | tr|A0A4D9AK10|A0A4D9AK10_SALSN |
| **56** | MLDIGNDNNQLDFK | 1635.7562 | 14 | -2 | 35.71 | Non-toxin | Probable allergen | *Salvia splendens* | tr|A0A4D9AK10|A0A4D9AK10_SALSN |
| **57** | AGNPQSIESQK | 1157.5676 | 11 | 0 | 27.27 | Non-toxin | Probable non-allergen | *Salvia splendens* | tr|A0A4D9AK10|A0A4D9AK10_SALSN |
| **58** | VLPEYESEEEHSQR | 1730.7747 | 14 | -3.9 | 21.43 | Non-toxin | Probable allergen | *Salvia splendens* | tr|A0A4D9AK10|A0A4D9AK10_SALSN |
| **59** | IKKNLDHPTSA | 1222.6670 | 11 | 1.1 | 36.36 | Non-toxin | Probable non-allergen | *Salvia splendens* | tr|A0A4D9AK10|A0A4D9AK10_SALSN |
| **60** | LLADAFNTEPELM | 1462.7013 | 13 | -3 | 61.54 | Non-toxin | Probable allergen | *Salvia splendens* | tr|A0A4D9AK10|A0A4D9AK10_SALSN |
| **61** | SMLDIGNDNNQLDF | 1594.6934 | 14 | -3 | 35.71 | Non-toxin | Probable allergen | *Salvia splendens* | tr|A0A4D9AK10|A0A4D9AK10_SALSN |
| **62** | VYNDGDAPLTYV | 1325.6139 | 12 | -2 | 41.67 | Non-toxin | Probable allergen | *Salvia splendens* | tr|A0A4D9AK10|A0A4D9AK10_SALSN |
| **63** | LDIGNDNNQLDF | 1376.6208 | 12 | -3 | 33.33 | Non-toxin | Probable allergen | *Salvia splendens* | tr|A0A4D9AK10|A0A4D9AK10_SALSN |
| **64** | SMLDIGNDNNQLD | 1447.6249 | 13 | -3 | 30.77 | Non-toxin | Probable allergen | *Salvia splendens* | tr|A0A4D9AK10|A0A4D9AK10_SALSN |
| **65** | GNPQSIESQK | 1086.5305 | 10 | 0 | 20 | Non-toxin | Probable non-allergen | *Salvia splendens* | tr|A0A4D9AK10|A0A4D9AK10_SALSN |
| **66** | VSMLDIGNDNNQLDF | 1693.7617 | 15 | -2 | 37.5 | Non-toxin | Probable non-allergen | *Salvia splendens* | tr|A0A4D9AK10|A0A4D9AK10_SALSN |
| **67** | KTNDNAMNAQ | 1105.4822 | 10 | 0 | 30 | Non-toxin | Probable allergen | *Salvia splendens* | tr|A0A4D9AK10|A0A4D9AK10_SALSN |
| **68** | RLQGKEDER | 1129.5840 | 9 | 0 | 11.11 | Non-toxin | Probable non-allergen | *Salvia splendens* | tr|A0A4D9AK10|A0A4D9AK10_SALSN |
| **69** | SMLDIGNDNNQL | 1332.5980 | 12 | -2 | 33.33 | Non-toxin | Probable allergen | *Salvia splendens* | tr|A0A4D9AK10|A0A4D9AK10_SALSN |
| **70** | NLDHPTSAD | 968.4199 | 9 | -1.9 | 33.33 | Non-toxin | Probable allergen | *Salvia splendens* | tr|A0A4D9AK10|A0A4D9AK10_SALSN |
| **71** | IQVVGTQGR | 956.5403 | 9 | 1 | 33.33 | Non-toxin | Probable allergen | *Salvia splendens* | tr|A0A4D9AK10|A0A4D9AK10_SALSN |
| **72** | NLDHPTSA | 853.3930 | 8 | -0.9 | 37.5 | Non-toxin | Probable allergen | *Salvia splendens* | tr|A0A4D9AK10|A0A4D9AK10_SALSN |
| **73** | HQVQPKGL | 905.5083 | 8 | 1.1 | 37.5 | Non-toxin | Probable non-allergen | *Salvia splendens* | tr|A0A4D9AK10|A0A4D9AK10_SALSN |
| **74** | RGDVIALPEGITT | 1340.7300 | 13 | -1 | 46.51 | Non-toxin | Probable allergen | *Salvia splendens* | tr|A0A4D9AK10|A0A4D9AK10_SALSN |
| **75** | ISRDEAKSL | 1017.5454 | 9 | 0 | 33.33 | Non-toxin | Probable non-allergen | *Salvia splendens* | tr|A0A4D9AK10|A0A4D9AK10_SALSN |
| **76** | KNLDHPTSAD | 1096.5149 | 10 | -0.9 | 30 | Non-toxin | Probable allergen | *Salvia splendens* | tr|A0A4D9AK10|A0A4D9AK10_SALSN |
| **77** | FGREEST | 824.3664 | 7 | -1 | 14.29 | Non-toxin | Probable allergen | *Salvia splendens* | tr|A0A4D9AK10|A0A4D9AK10_SALSN |
| **78** | GEAKVEVVDHSGQT | 1454.7001 | 14 | -1.9 | 28.57 | Non-toxin | Probable allergen | *Salvia splendens* | tr|A0A4D9B354|A0A4D9B354_SALSN |
| **79** | TARAGNEGFEWV | 1335.6207 | 12 | -1 | 41.67 | Non-toxin | Probable allergen | *Salvia splendens* | tr|A0A4D9B354|A0A4D9B354_SALSN |
| **80** | MDMSAEKG | 867.3466 | 8 | -1 | 37.5 | Non-toxin | Probable allergen | *Salvia splendens* | tr|A0A4D9B354|A0A4D9B354_SALSN |
| **81** | SVNDLNHQSNQLDHK | 1747.8237 | 15 | -0.8 | 20 | Non-toxin | Probable non-allergen | *Salvia splendens* | tr|A0A4D9B354|A0A4D9B354_SALSN |
| **82** | VTKGEAKVEVVDHSGQT | 1782.9111 | 17 | -0.9 | 29.41 | Non-toxin | Probable allergen | *Salvia splendens* | tr|A0A4D9B354|A0A4D9B354_SALSN |
| **83** | NIVFPGQEEERES | 1532.7107 | 13 | -3 | 30.77 | Non-toxin | Probable non-allergen | *Salvia splendens* | tr|A0A4D9AWB5|A0A4D9AWB5_SALSN |
| **84** | LKSEDDFRGQ | 1193.5676 | 10 | -1 | 20 | Non-toxin | Probable allergen | *Salvia splendens* | tr|A0A4D9AWB5|A0A4D9AWB5_SALSN |
| **85** | FDSEAGRTE | 1010.4305 | 9 | -2 | 22.22 | Non-toxin | Probable non-allergen | *Salvia splendens* | tr|A0A4D9AWB5|A0A4D9AWB5_SALSN |
| **86** | KLKSEDDFRG | 1193.6040 | 10 | 0 | 20 | Non-toxin | Probable non-allergen | *Salvia splendens* | tr|A0A4D9AWB5|A0A4D9AWB5_SALSN |
| **87** | LNLDEPSRADI | 1241.6251 | 11 | -2 | 45.45 | Non-toxin | Probable non-allergen | *Salvia splendens* | tr|A0A4D9AWB5|A0A4D9AWB5_SALSN |
| **88** | YNNGEERLET | 1223.5419 | 10 | -2 | 10 | Non-toxin | Probable allergen | *Salvia splendens* | tr|A0A4D9AWB5|A0A4D9AWB5_SALSN |
| **89** | KSEDDFRGQ | 1080.4835 | 9 | -1 | 11.11 | Non-toxin | Probable non-allergen | *Salvia splendens* | tr|A0A4D9AWB5|A0A4D9AWB5_SALSN |
| **90** | FNIVFPGQEEERES | 1679.7791 | 14 | -3 | 35.71 | Non-toxin | Probable allergen | *Salvia splendens* | tr|A0A4D9AWB5|A0A4D9AWB5_SALSN |
| **91** | SFVDRHQ | 887.4249 | 7 | 0.1 | 28.57 | Non-toxin | Probable allergen | *Salvia splendens* | tr|A0A4D9AWB5|A0A4D9AWB5_SALSN |
| **92** | LRFDSEAGRT | 1150.5730 | 10 | 0 | 30 | Non-toxin | Probable allergen | *Salvia splendens* | tr|A0A4D9AWB5|A0A4D9AWB5_SALSN |
| **93** | RLNLDEPSRA | 1169.6152 | 10 | 0 | 40 | Non-toxin | Probable non-allergen | *Salvia splendens* | tr|A0A4D9AWB5|A0A4D9AWB5_SALSN |
| **94** | SFVDRHQKV | 1114.5883 | 9 | 1.1 | 33.33 | Non-toxin | Probable allergen | *Salvia splendens* | tr|A0A4D9AWB5|A0A4D9AWB5_SALSN |
| **95** | FNVDRETA | 950.4457 | 8 | -1 | 37.5 | Non-toxin | Probable non-allergen | *Salvia splendens* | tr|A0A4D9AWB5|A0A4D9AWB5_SALSN |
| **96** | LRFDSEAGR | 1049.5254 | 9 | 0 | 33.33 | Non-toxin | Probable allergen | *Salvia splendens* | tr|A0A4D9AWB5|A0A4D9AWB5_SALSN |
| **97** | LAGNPGNQQEEEQYR | 1731.7812 | 15 | -2 | 20 | Non-toxin | Probable allergen | *Salvia splendens* | tr|A0A4D9ABF2|A0A4D9ABF2_SALSN |
| **98** | KQAEEQGFEWV | 1349.6251 | 11 | -2 | 36.36 | Non-toxin | Probable allergen | *Salvia splendens* | tr|A0A4D9ABF2|A0A4D9ABF2_SALSN |
| **99** | VFHHNSN | 853.3831 | 7 | 0.2 | 28.57 | Non-toxin | Probable allergen | *Salvia splendens* | tr|A0A4D9ABF2|A0A4D9ABF2_SALSN |
| **100** | AVVKQAEEQ | 1000.5189 | 9 | -1 | 44.44 | Non-toxin | Probable allergen | *Salvia splendens* | tr|A0A4D9ABF2|A0A4D9ABF2_SALSN |
| **101** | NVDVETAR | 902.4457 | 8 | -1 | 37.5 | Non-toxin | Probable allergen | *Salvia splendens* | tr|A0A4D9ABF2|A0A4D9ABF2_SALSN |
| **102** | FGGESKGTHNI | 1145.5465 | 11 | 0.1 | 18.18 | Non-toxin | Probable non-allergen | *Salvia splendens* | tr|A0A4D9B3A9|A0A4D9B3A9_SALSN |
| **103** | GTVVVVPAGHPF | 1178.6448 | 12 | 0.1 | 66.67 | Non-toxin | Probable allergen | *Salvia splendens* | tr|A0A4D9B3A9|A0A4D9B3A9_SALSN |
| **104** | KVNADNNEQFT | 1278.5840 | 11 | -1 | 27.27 | Non-toxin | Probable allergen | *Salvia splendens* | tr|A0A4D9B3A9|A0A4D9B3A9_SALSN |
| **105** | TGTVVVVPAGHPF | 1279.6924 | 13 | 0.1 | 61.54 | Non-toxin | Probable allergen | *Salvia splendens* | tr|A0A4D9B3A9|A0A4D9B3A9_SALSN |
| **106** | REVEEVLRSQ | 1243.6520 | 10 | -1 | 30 | Non-toxin | Probable allergen | *Salvia splendens* | tr|A0A4D9B3A9|A0A4D9B3A9_SALSN |
| **107** | SQHQEGGIWPF | 1284.5887 | 11 | -0.9 | 36.36 | Non-toxin | Probable allergen | *Salvia splendens* | tr|A0A4D9B3A9|A0A4D9B3A9_SALSN |
| **108** | KDVTVESGKGAVG | 1245.6565 | 13 | 0 | 30.77 | Non-toxin | Probable non-allergen | *Salvia splendens* | tr|A0A4D8XX74|A0A4D8XX74_SALSN |
| tr|A0A2G9GY36|A0A2G9GY36_9LAMI |
| **109** | VEIGQTTKD | 989.5029 | 9 | -1 | 22.22 | Non-toxin | Probable allergen | *Salvia splendens* | tr|A0A4D8XX74|A0A4D8XX74_SALSN |
| tr|A0A2G9GY36|A0A2G9GY36_9LAMI |
| **110** | FSASRPST | 851.4137 | 8 | 1 | 37.5 | Non-toxin | Probable allergen | *Salvia splendens* | tr|A0A4D9B762|A0A4D9B762_SALSN |
| **111** | QISREEAETIKNS | 1503.7528 | 13 | -1 | 23.08 | Non-toxin | Probable allergen | *Salvia splendens* | tr|A0A4D9B762|A0A4D9B762_SALSN |
| **112** | AGDAHWA | 726.3085 | 7 | -0.9 | 57.14 | Non-toxin | Probable non-allergen | *Salvia splendens* | tr|A0A4D9B762|A0A4D9B762_SALSN |
| **113** | SASRPST | 704.3453 | 7 | 1 | 28.57 | Non-toxin | Probable non-allergen | *Salvia splendens* | tr|A0A4D9B762|A0A4D9B762_SALSN |
| **114** | AHDVKEKAEQ | 1153.5728 | 10 | -0.9 | 30 | Non-toxin | Probable allergen | *Salvia splendens* | tr|A0A4D9BHZ8|A0A4D9BHZ8_SALSN |
| *Nicotiana tabacum* | tr|A0A1S3Y298|A0A1S3Y298_TOBAC |
| *Nicotiana attenuata* | tr|A0A1J6I4J0|A0A1J6I4J0_NICAT |
| *Capsicum annuum* | tr|A0A2G2ZA68|A0A2G2ZA68_CAPAN |
| *Capsicum baccatum* | tr|A0A2G2WJU3|A0A2G2WJU3_CAPBA |
| *Capsicum chinense* | tr|A0A2G3AY58|A0A2G3AY58_CAPCH |
| *Capsicum annuum* | tr|A0A1U8H204|A0A1U8H204_CAPAN |
| **115** | HDVKEKAEQ | 1082.5356 | 9 | -0.9 | 22.22 | Non-toxin | Probable allergen | *Salvia splendens* | tr|A0A4D9BHZ8|A0A4D9BHZ8_SALSN |
| *Nicotiana tabacum* | tr|A0A1S3Y298|A0A1S3Y298_TOBAC |
| *Nicotiana attenuata* | tr|A0A1J6I4J0|A0A1J6I4J0_NICAT |
| *Capsicum annuum* | tr|A0A2G2ZA68|A0A2G2ZA68_CAPAN |
| *Capsicum baccatum* | tr|A0A2G2WJU3|A0A2G2WJU3_CAPBA |
| *Capsicum chinense* | tr|A0A2G3AY58|A0A2G3AY58_CAPCH |
| *Capsicum annuum* | tr|A0A1U8H204|A0A1U8H204_CAPAN |
| **116** | HAETFPDK | 943.4399 | 8 | -0.9 | 37.5 | Non-toxin | Probable non-allergen | *Salvia splendens* | tr|A0A4D8ZW70|A0A4D8ZW70_SALSN |
| **117** | PDMDHPNGTPG | 1136.4557 | 11 | -1.9 | 36.36 | Non-toxin | Probable non-allergen | *Salvia splendens* | tr|A0A4D8ZW70|A0A4D8ZW70_SALSN |
| **118** | TGKGPDAYN | 921.4192 | 9 | 0 | 22.22 | Non-toxin | Probable non-allergen | *Salvia splendens* | tr|A0A4D9BWQ3|A0A4D9BWQ3_SALSN |
| **119** | VAGGKNPKS | 856.4766 | 9 | 2 | 33.33 | Non-toxin | Probable non-allergen | *Salvia splendens* | tr|A0A4D9BWQ3|A0A4D9BWQ3_SALSN |

# **Table 2.** *De novo* peptide sequences with their physicochemical properties and allegenicity and toxicity predictions, identified from the protein fraction <1 kDa of *S. hispanica.*

| **No.** | **Peptide sequence** | **ALC (%)** | **Molecular**  **weight (Da)** | **Lenght** | **Net charge** | **Hydrophobicity (%)** | **Toxicity** | **Allergenicity** |
| --- | --- | --- | --- | --- | --- | --- | --- | --- |
| **1** | KVVDMH | 99 | 727.3687 | 6 | 0.1 | 50 | Non-toxin | Probable allergen |
| **2** | RAALPR | 97 | 682.4238 | 6 | 2 | 66.67 | Non-toxin | Probable non-allergen |
| **3** | WFDSVVKE | 96 | 1008.492 | 8 | -1 | 50 | Non-toxin | Probable allergen |
| **4** | RFNDR | 96 | 707.3351 | 5 | 1 | 20 | Non-toxin | Probable non-allergen |
| **5** | AKVELVDH | 96 | 909.4919 | 8 | -0.9 | 50 | Non-toxin | Probable non-allergen |
| **6** | VELVNH | 95 | 710.3599 | 6 | -0.9 | 50 | Non-toxin | Probable allergen |
| **7** | LFAPHW | 95 | 769.3911 | 6 | 0.1 | 83.33 | Non-toxin | Probable allergen |
| **8** | MDMSAEK | 94 | 810.3252 | 7 | -1 | 42.86 | Non-toxin | Probable non-allergen |
| **9** | MLVLRK | 94 | 758.4836 | 6 | 2 | 66.67 | Non-toxin | Probable non-allergen |
| **10** | SFVDRH | 94 | 759.3664 | 6 | 0.1 | 33.33 | Non-toxin | Probable allergen |
| **11** | LAGGRLPH | 94 | 819.4715 | 8 | 1.1 | 50 | Non-toxin | Probable non-allergen |
| **12** | FSTDRH | 94 | 761.3456 | 6 | 0.1 | 16.67 | Non-toxin | Probable allergen |
| **13** | LDEPSR | 94 | 715.35 | 6 | -1 | 33.33 | Non-toxin | Probable non-allergen |
| **14** | VFEDRH | 94 | 801.3769 | 6 | -0.9 | 33.33 | Non-toxin | Probable allergen |
| **15** | DRLRL | 93 | 671.4078 | 5 | 1 | 40 | Non-toxin | Probable non-allergen |
| **16** | YQLSREE | 93 | 923.4348 | 7 | -1 | 14.29 | Non-toxin | Probable allergen |
| **17** | FVRHQ | 93 | 685.366 | 5 | 1.1 | 40 | Non-toxin | Probable allergen |
| **18** | SNKLDGAE | 92 | 832.3926 | 8 | -1 | 25 | Non-toxin | Probable non-allergen |
| **19** | LKRALPP | 92 | 793.5174 | 7 | 2 | 71.43 | Non-toxin | Probable non-allergen |
| **20** | KVGGQTAQ | 92 | 787.4188 | 8 | 1 | 25 | Non-toxin | Probable non-allergen |
| **21** | LLVRAEK | 92 | 827.5228 | 7 | 1 | 57.14 | Non-toxin | Probable non-allergen |
| **22** | LLAAMTT | 92 | 735.3837 | 7 | 0 | 71.43 | Non-toxin | Probable non-allergen |
| **23** | VLKKNVM | 92 | 846.4997 | 7 | 2 | 57.14 | Non-toxin | Probable allergen |
| **24** | HVRLPN | 92 | 734.4188 | 6 | 1.1 | 50 | Non-toxin | Probable non-allergen |
| **25** | WNGGHNNE | 92 | 927.3471 | 8 | -0.9 | 12.5 | Non-toxin | Probable non-allergen |
| **26** | MKSTEEERGLW | 92 | 1364.639 | 11 | -1 | 27.27 | Non-toxin | Probable non-allergen |
| **27** | WNSAKDAAASAK | 92 | 1219.583 | 12 | 1 | 50 | Non-toxin | Probable allergen |
| **28** | MLKQR | 91 | 690.3847 | 5 | 2 | 40 | Non-toxin | Probable allergen |
| **29** | WFVNEETAR | 91 | 1151.525 | 9 | -1 | 44.44 | Non-toxin | Probable allergen |
| **30** | LYNNKY | 91 | 813.4021 | 6 | 1 | 16.67 | Non-toxin | Probable allergen |
| **31** | LDMNAGLMKV | 90 | 1091.535 | 10 | 0 | 60 | Non-toxin | Probable non-allergen |
| **32** | YNNKY | 90 | 700.3181 | 5 | 1 | 0 | Non-toxin | Probable allergen |
| **33** | WDEKE | 90 | 705.2969 | 5 | -2 | 20 | Non-toxin | Probable allergen |
| **34** | FLQQRN | 90 | 804.4242 | 6 | 1 | 33.33 | Non-toxin | Probable allergen |
| **35** | LKVLQPPF | 90 | 940.5745 | 8 | 1 | 75 | Non-toxin | Probable allergen |
| **36** | LSVNNNNHKS | 90 | 1125.553 | 10 | 1.1 | 20 | Non-toxin | Probable allergen |
| **37** | ANLYNPR | 90 | 847.4188 | 7 | 1 | 42.86 | Non-toxin | Probable non-allergen |
| **38** | MPTGSELNKLNHT | 90 | 1441.687 | 13 | 0.1 | 30.77 | Non-toxin | Probable allergen |
| **39** | RLARLD | 90 | 742.4449 | 6 | 1 | 50 | Non-toxin | Probable allergen |
| **40** | LAANPDR | 90 | 756.3766 | 7 | 0 | 57.14 | Non-toxin | Probable allergen |
| **41** | VSREEAQ | 90 | 817.3929 | 7 | -1 | 28.57 | Non-toxin | Probable non-allergen |
| **42** | RFAAPH | 89 | 697.366 | 6 | 1.1 | 66.67 | Non-toxin | Probable non-allergen |
| **43** | LLVRAE | 89 | 699.4279 | 6 | 0 | 66.67 | Non-toxin | Probable allergen |
| **44** | HTFGNAPAH | 89 | 950.4359 | 9 | 0.2 | 44.44 | Non-toxin | Probable allergen |
| **45** | FYMPGEERKN | 89 | 1269.581 | 10 | 0 | 30 | Non-toxin | Probable non-allergen |
| **46** | FDHGLLP | 89 | 797.4072 | 7 | -0.9 | 57.14 | Non-toxin | Probable allergen |
| **47** | YKASNSGSW | 89 | 998.4457 | 9 | 1 | 22.22 | Non-toxin | Probable allergen |
| **48** | FSSESEQKGQQRD | 89 | 1524.68 | 13 | -1 | 7.69 | Non-toxin | Probable allergen |
| **49** | LELPNWGQEQQKEQ | 89 | 1725.832 | 14 | -2 | 28.57 | Non-toxin | Probable allergen |
| **50** | SNQEVHK | 89 | 840.409 | 7 | 0.1 | 14.29 | Non-toxin | Probable non-allergen |
| **51** | LQGKEDEGR | 89 | 1030.504 | 9 | -1 | 11.11 | Non-toxin | Probable allergen |
| **52** | VVKGAGGTYG | 89 | 907.4763 | 10 | 1 | 30 | Non-toxin | Probable non-allergen |
| **53** | LNLDEPSRW | 89 | 1128.556 | 9 | -1 | 44.44 | Non-toxin | Probable non-allergen |
| **54** | LAGSEQPASK | 88 | 986.5032 | 10 | 0 | 40 | Non-toxin | Probable non-allergen |
| **55** | AQEGEGGAQAGAVGGGATKA | 88 | 1685.797 | 20 | -1 | 35 | Non-toxin | Probable non-allergen |
| **56** | LDFKF | 88 | 668.3533 | 5 | 0 | 60 | Non-toxin | Probable non-allergen |
| **57** | HLAEGR | 88 | 681.3558 | 6 | 0.1 | 33.33 | Non-toxin | Probable non-allergen |
| **58** | WFDSVVR | 88 | 907.4552 | 7 | 0 | 57.14 | Non-toxin | Probable non-allergen |
| **59** | LVQDNSNNANQLDQNPRS | 88 | 2025.946 | 18 | -1 | 27.78 | Non-toxin | Probable non-allergen |
| **60** | MQATEEERG | 88 | 1049.445 | 9 | -2 | 22.22 | Non-toxin | Probable allergen |
| **61** | SKEQEF | 88 | 766.3497 | 6 | -1 | 16.67 | Non-toxin | Probable non-allergen |
| **62** | FENMLYEV | 88 | 1044.447 | 8 | -2 | 50 | Non-toxin | Probable allergen |
| **63** | LYNPR | 88 | 661.3547 | 5 | 1 | 40 | Non-toxin | Probable allergen |
| **64** | HKVQPGQ | 88 | 792.4242 | 7 | 1.1 | 28.57 | Non-toxin | Probable non-allergen |
| **65** | SKKAGGAGEY | 88 | 966.477 | 10 | 1 | 20 | Non-toxin | Probable non-allergen |
| **66** | LKFQSE | 88 | 750.3912 | 6 | 0 | 33.33 | Non-toxin | Probable allergen |
| **67** | TEEERGLS | 88 | 919.4247 | 8 | -2 | 12.5 | Non-toxin | Probable non-allergen |
| **68** | RFGGWVL | 87 | 833.4548 | 7 | 1 | 57.14 | Non-toxin | Probable non-allergen |
| **69** | SMLSPH | 87 | 686.3058 | 6 | 0.1 | 50 | Non-toxin | Probable non-allergen |
| **70** | NDLNHQ | 87 | 739.3249 | 6 | -0.9 | 16.67 | Non-toxin | Probable allergen |
| **71** | FNVDGQR | 87 | 834.3984 | 7 | 0 | 28.57 | Non-toxin | Probable allergen |
| **72** | RSYPSPR | 87 | 861.4457 | 7 | 2 | 28.57 | Non-toxin | Probable non-allergen |
| **73** | RNYVPLEK | 87 | 1017.561 | 8 | 1 | 37.5 | Non-toxin | Probable allergen |
| **74** | WFDGEVREGKM | 87 | 1352.618 | 11 | -1 | 36.36 | Non-toxin | Probable non-allergen |
| **75** | YSRQET | 87 | 782.3559 | 6 | 0 | 0 | Non-toxin | Probable allergen |
| **76** | RSLEEAER | 87 | 988.4937 | 8 | -1 | 25 | Non-toxin | Probable allergen |
| **77** | SSVLPPNL | 87 | 825.4596 | 8 | 0 | 62.5 | Non-toxin | Probable non-allergen |
| **78** | VVLSPSVSNEEVLT | 87 | 1471.777 | 14 | -2 | 50 | Non-toxin | Probable allergen |
| **79** | KYLHPDEDTS | 87 | 1203.541 | 10 | -1.9 | 20 | Non-toxin | Probable non-allergen |
| **80** | VLKHSR | 87 | 738.45 | 6 | 2.1 | 33.33 | Non-toxin | Probable non-allergen |
| **81** | VEHKQV | 87 | 738.4024 | 6 | 0.1 | 33.33 | Non-toxin | Probable allergen |
| **82** | TSYDERG | 86 | 826.3457 | 7 | -1 | 0 | Non-toxin | Probable allergen |
| **83** | LTADNRL | 86 | 801.4344 | 7 | 0 | 42.86 | Non-toxin | Probable non-allergen |
| **84** | VEGSLLE | 86 | 745.3857 | 7 | -2 | 42.86 | Non-toxin | Probable non-allergen |
| **85** | YKNSGSA | 86 | 725.3344 | 7 | 1 | 14.29 | Non-toxin | Probable non-allergen |
| **86** | LQQKGER | 86 | 858.4559 | 7 | 1 | 14.29 | Non-toxin | Probable allergen |
| **87** | LQGREF | 86 | 748.3868 | 6 | 0 | 33.33 | Non-toxin | Probable non-allergen |
| **88** | FATPPASSK | 86 | 904.4654 | 9 | 1 | 55.56 | Non-toxin | Probable non-allergen |
| **89** | RVNKF | 86 | 662.3864 | 5 | 2 | 40 | Non-toxin | Probable allergen |
| **90** | ARLKPPF | 86 | 827.5017 | 7 | 2 | 71.43 | Non-toxin | Probable non-allergen |
| **91** | YDLTREEAKN | 86 | 1237.594 | 10 | -1 | 20 | Non-toxin | Probable non-allergen |
| **92** | VVLSAHYVVPM | 86 | 1213.653 | 11 | 0.1 | 72.73 | Non-toxin | Probable non-allergen |
| **93** | RALKPP | 86 | 680.4333 | 6 | 2 | 66.67 | Non-toxin | Probable non-allergen |
| **94** | QLLAGPH | 86 | 734.4075 | 7 | 0.1 | 57.14 | Non-toxin | Probable allergen |
| **95** | DMHLRPLLS | 85 | 1080.575 | 9 | 0.1 | 55.56 | Non-toxin | Probable allergen |
| **96** | VNSHKLP | 85 | 793.4446 | 7 | 0.1 | 42.86 | Non-toxin | Probable allergen |
| **97** | SVLSTMLSH | 85 | 973.4903 | 9 | 0.1 | 44.44 | Non-toxin | Probable non-allergen |
| **98** | VFSNHMSF | 85 | 967.4222 | 8 | 0.1 | 50 | Non-toxin | Probable allergen |
| **99** | FRAKTQ | 85 | 749.4184 | 6 | 2 | 33.33 | Non-toxin | Probable allergen |
| **100** | EEAELR | 85 | 745.3606 | 6 | -2 | 33.33 | Non-toxin | Probable allergen |
| **101** | LKYHVLAL | 85 | 955.5854 | 8 | 1.1 | 62.5 | Non-toxin | Probable non-allergen |
| **102** | WARLGTEGY | 85 | 1051.509 | 9 | 0 | 33.33 | Non-toxin | Probable non-allergen |
| **103** | FQKGDV | 85 | 692.3493 | 6 | 0 | 33.33 | Non-toxin | Probable allergen |
| **104** | MLVARP | 85 | 685.3945 | 6 | 1 | 83.33 | Non-toxin | Probable allergen |
| **105** | RKLHF | 85 | 699.418 | 5 | 2.1 | 40 | Non-toxin | Probable allergen |
| **106** | NRLSTV | 85 | 688.3868 | 6 | 1 | 33.33 | Non-toxin | Probable allergen |
| **107** | FNVDRET | 84 | 879.4086 | 7 | -1 | 28.57 | Non-toxin | Probable allergen |
| **108** | MMGKVGVEGAR | 84 | 1133.569 | 11 | 1 | 45.45 | Non-toxin | Probable allergen |
| **109** | LMGGVNSLPDV | 84 | 1117.533 | 11 | -1 | 54.55 | Non-toxin | Probable allergen |
| **110** | LYDQRP | 84 | 790.3973 | 6 | 0 | 33.33 | Non-toxin | Probable non-allergen |
| **111** | MWLHSP | 84 | 785.353 | 6 | 0.1 | 66.67 | Non-toxin | Probable non-allergen |
| **112** | DAERSTL | 84 | 790.3821 | 7 | -1 | 28.57 | Non-toxin | Probable non-allergen |
| **113** | KLKKNL | 84 | 742.5065 | 6 | 3 | 33.33 | Non-toxin | Probable allergen |
| **114** | DEDVKRS | 84 | 847.4035 | 7 | -1 | 14.29 | Non-toxin | Probable allergen |
| **115** | GPLVLVETR | 84 | 982.5811 | 9 | 0 | 55.56 | Non-toxin | Probable allergen |
| **116** | LPRAPHW | 84 | 875.4766 | 7 | 1.1 | 71.43 | Non-toxin | Probable allergen |
| **117** | AELFNVSLAETA | 84 | 1263.635 | 12 | -2 | 58.33 | Non-toxin | Probable non-allergen |
| **118** | SGVAVAPR | 84 | 755.429 | 8 | 1 | 62.5 | Non-toxin | Probable allergen |
| **119** | FLQNRT | 83 | 777.4133 | 6 | 1 | 33.33 | Non-toxin | Probable allergen |
| **120** | YVSPVFQ | 83 | 838.4225 | 7 | 0 | 57.14 | Non-toxin | Probable allergen |
| **121** | YYGLVVGVMLK | 83 | 1240.689 | 11 | 1 | 54.55 | Non-toxin | Probable non-allergen |
| **122** | LLPAKR | 83 | 696.4646 | 6 | 2 | 66.67 | Non-toxin | Probable non-allergen |
| **123** | VKENLDRA | 83 | 943.5087 | 8 | 0 | 37.5 | Non-toxin | Probable non-allergen |
| **124** | RTDPLQK | 83 | 856.4766 | 7 | 1 | 33.33 | Non-toxin | Probable allergen |
| **125** | VLSGHYANK | 83 | 987.5137 | 9 | 1.1 | 33.33 | Non-toxin | Probable non-allergen |
| **126** | VVVVSSATL | 83 | 873.5172 | 9 | 0 | 66.67 | Non-toxin | Probable non-allergen |
| **127** | MPYNPKAGLR | 83 | 1145.602 | 10 | 2 | 50 | Non-toxin | Probable non-allergen |
| **128** | VLVGAHLHK | 83 | 972.5869 | 9 | 1.2 | 55.56 | Non-toxin | Probable non-allergen |
| **129** | MAVVAPKKV | 83 | 941.5732 | 9 | 2 | 77.78 | Non-toxin | Probable non-allergen |
| **130** | WFDGQVVWGK | 83 | 1221.582 | 10 | 0 | 50 | Non-toxin | Probable non-allergen |
| **131** | VTQWAKVELVDHKMN | 83 | 1796.924 | 15 | 0.1 | 46.67 | Non-toxin | Probable allergen |
| **132** | QRAKGALPE | 83 | 968.5403 | 9 | 1 | 44.44 | Non-toxin | Probable non-allergen |
| **133** | FLPGRW | 83 | 774.4177 | 6 | 1 | 66.67 | Non-toxin | Probable non-allergen |
| **134** | YVGEKTK | 83 | 823.4439 | 7 | 1 | 14.29 | Non-toxin | Probable allergen |
| **135** | MMNNGVVSKGDM | 83 | 1282.536 | 12 | 0 | 41.67 | Non-toxin | Probable allergen |
| **136** | MMYNPGVK | 82 | 938.4354 | 8 | 1 | 50 | Non-toxin | Probable non-allergen |
| **137** | HYKPAN | 82 | 728.3605 | 6 | 1.1 | 33.33 | Non-toxin | Probable non-allergen |
| **138** | YLAGSEPKASQSEKT | 82 | 1594.784 | 15 | 0 | 26.67 | Non-toxin | Probable non-allergen |
| **139** | AGRTEF | 82 | 679.3289 | 6 | 0 | 33.33 | Non-toxin | Probable allergen |
| **140** | LAGRSAL | 82 | 686.4075 | 7 | 1 | 57.14 | Non-toxin | Probable allergen |
| **141** | LSAVGAPR | 82 | 769.4446 | 8 | 1 | 62.5 | Non-toxin | Probable allergen |
| **142** | LVTGGSPGMRK | 82 | 1101.596 | 11 | 2 | 36.36 | Non-toxin | Prob no alg |
| **143** | KVATPVN | 82 | 727.4228 | 7 | 1 | 57.14 | Non-toxin | Probable allergen |
| **144** | NNYNPKAGR | 82 | 1032.51 | 9 | 2 | 22.22 | Non-toxin | Probable allergen |
| **145** | VAGGGSSKAVL | 81 | 944.5291 | 11 | 1 | 45.45 | Non-toxin | Probable non-allergen |
| **146** | AFHRTPPE | 81 | 953.4719 | 8 | 0.1 | 50 | Non-toxin | Probable non-allergen |
| **147** | KYGSGASGSWQ | 81 | 1126.504 | 11 | 1 | 18.18 | Non-toxin | Probable non-allergen |
| **148** | KLGSALLA | 81 | 771.4854 | 8 | 1 | 62.5 | Non-toxin | Probable non-allergen |
| **149** | MMNVKLV | 81 | 833.4503 | 7 | 1 | 71.43 | Non-toxin | Probable non-allergen |
| **150** | RFMVPLEK | 81 | 1018.563 | 8 | 1 | 62.5 | Non-toxin | Probable non-allergen |
| **151** | YALDLGNNNNGALDKF | 81 | 1738.816 | 16 | -1 | 37.5 | Non-toxin | Probable non-allergen |
| **152** | MMEYVASLP | 81 | 1039.472 | 9 | -1 | 66.67 | Non-toxin | Probable allergen |
| **153** | SVALTSY | 81 | 739.3752 | 7 | 0 | 42.86 | Non-toxin | Probable allergen |
| **154** | NNASLLLYE | 81 | 1035.524 | 9 | -1 | 44.44 | Non-toxin | Probable allergen |
| **155** | RCLAVNGGR | 81 | 1001.519 | 9 | 1.9 | 33.33 | Non-toxin | Probable allergen |
| **156** | WAKNHGSL | 81 | 912.4454 | 8 | 1.1 | 37.5 | Non-toxin | Probable allergen |
| **157** | ARLDEPSR | 81 | 942.4882 | 8 | 0 | 37.5 | Non-toxin | Probable non-allergen |
| **158** | HKLPLSL | 81 | 806.5014 | 7 | 1.1 | 57.14 | Non-toxin | Probable non-allergen |
| **159** | FAGFEFK | 81 | 844.4119 | 7 | 0 | 57.14 | Non-toxin | Probable allergen |
| **160** | NQLDQNPR | 80 | 983.4785 | 8 | 0 | 25 | Non-toxin | Probable non-allergen |
| **161** | LYSGHML | 80 | 835.3898 | 7 | 0.1 | 42.86 | Non-toxin | Probable allergen |
| **162** | RGFVVK | 80 | 704.4333 | 6 | 2 | 50 | Non-toxin | Probable allergen |
| **163** | KLKQVDK | 80 | 857.5334 | 7 | 2 | 28.57 | Non-toxin | Probable non-allergen |
| **164** | KLGSHR | 80 | 696.4031 | 6 | 2.1 | 16.67 | Non-toxin | Probable non-allergen |
| **165** | HPTGGGF | 80 | 671.3027 | 7 | 0.1 | 28.57 | Non-toxin | Probable allergen |
| **166** | LNQGGPRS | 80 | 828.4089 | 8 | 1 | 25 | Non-toxin | Probable non-allergen |
| **167** | KVMGDPAN | 80 | 830.3956 | 8 | 0 | 50 | Non-toxin | Probable non-allergen |
| **168** | FYTHRT | 80 | 823.3976 | 6 | 11 | 16.67 | Non-toxin | Probable non-allergen |
| **169** | MQSWHTNY | 80 | 1065.434 | 8 | 0.1 | 25 | Non-toxin | Probable allergen |
| **170** | NDLAGHSN | 80 | 826.3569 | 8 | -0.9 | 25 | Non-toxin | Probable non-allergen |
| **171** | LKLHPM | 80 | 753.4207 | 6 | 1.1 | 66.67 | Non-toxin | Probable allergen |
| **172** | VLGGPPGGHGLF | 80 | 1106.587 | 12 | 0.1 | 50 | Non-toxin | Probable allergen |
| **173** | WNDLNHKSNQL | 80 | 1367.658 | 11 | 0.1 | 27.27 | Non-toxin | Probable non-allergen |
| **174** | FGEETMNGMP | 80 | 1127.426 | 10 | -2 | 40 | Non-toxin | Probable allergen |
| **175** | QLLLPTR | 80 | 839.5229 | 7 | 1 | 57.14 | Non-toxin | Probable non-allergen |
| **176** | LTREEAK | 80 | 845.4606 | 7 | 0 | 28.57 | Non-toxin | Probable allergen |
| **177** | RVSQGDM | 80 | 791.3596 | 7 | 0 | 28.57 | Non-toxin | Probable allergen |
| **178** | VVNHATPSR | 80 | 980.5039 | 9 | 1.1 | 44.44 | Non-toxin | Probable non-allergen |
| **179** | FTGVKKTKEGED | 80 | 1337.683 | 12 | 0 | 16.67 | Non-toxin | Probable allergen |
| **180** | FFSGSRSS | 80 | 873.3981 | 8 | 1 | 25 | Non-toxin | Probable non-allergen |
| **181** | MPQQVETSAR | 79 | 1145.55 | 10 | 0 | 40 | Non-toxin | Probable allergen |
| **182** | RDTVAGSL | 79 | 817.4294 | 8 | 0 | 37.5 | Non-toxin | Probable non-allergen |
| **183** | YAVADK | 79 | 665.3384 | 6 | 0 | 50 | Non-toxin | Probable allergen |
| **184** | FGHELLSPP | 79 | 995.5076 | 9 | -0.9 | 55.56 | Non-toxin | Probable non-allergen |
| **185** | NRGAPPH | 79 | 747.3776 | 7 | 1.1 | 42.86 | Non-toxin | Probable allergen |
| **186** | VVNNGHSK | 79 | 853.4406 | 8 | 1.1 | 25 | Non-toxin | Probable allergen |
| **187** | KTFYPQQ | 79 | 910.4548 | 7 | 1 | 28.57 | Non-toxin | Probable allergen |
| **188** | MMAMAEKTGLFPN | 79 | 1439.661 | 13 | 0 | 61.54 | Non-toxin | Probable allergen |
| **189** | NGPKSLESQQQGEK | 79 | 1528.748 | 14 | 0 | 14.29 | Non-toxin | Probable allergen |
| **190** | ETSSGGGATKVVVPP | 79 | 1384.72 | 15 | 0 | 40 | Non-toxin | Probable non-allergen |
| **191** | YVVRGGK | 79 | 777.4497 | 7 | 2 | 28.57 | Non-toxin | Probable allergen |
| **192** | LSAHAPP | 79 | 691.3653 | 7 | 0.1 | 71.43 | Non-toxin | Probable non-allergen |
| **193** | RLPPTMALSE | 79 | 1129.58 | 10 | 0 | 60 | Non-toxin | Probable non-allergen |
| **194** | RVAGEALQTR | 79 | 1099.61 | 10 | 1 | 40 | Non-toxin | Probable allergen |
| **195** | MDVQAKMAGAR | 79 | 1208.564 | 11 | 1 | 54.55 | Non-toxin | Probable non-allergen |
| **196** | MGLSGVMAL | 79 | 893.4351 | 9 | 0 | 66.67 | Non-toxin | Probable non-allergen |
| **197** | MGNRHK | 79 | 758.3494 | 6 | 2.1 | 16.67 | Non-toxin | Probable non-allergen |
| **198** | HSPESEQKPSE | 79 | 1253.552 | 11 | -1.9 | 18.18 | Non-toxin | Probable non-allergen |
| **199** | EARPEK | 79 | 728.3817 | 6 | 0 | 33.33 | Non-toxin | Probable allergen |
| **200** | LTLLVVSH | 79 | 880.5382 | 8 | 0.1 | 62.5 | Non-toxin | Probable non-allergen |
| **201** | DVVAVRLRL | 79 | 1039.65 | 9 | 1 | 66.67 | Non-toxin | Probable non-allergen |
| **202** | FLVKSTLL | 79 | 919.5742 | 8 | 1 | 62.5 | Non-toxin | Probable non-allergen |
| **203** | RSLAGEEAER | 79 | 1116.552 | 10 | -1 | 30 | Non-toxin | Probable allergen |
| **204** | TNLENKVGNANL | 78 | 1287.631 | 12 | 0 | 33.33 | Non-toxin | Probable allergen |
| **205** | LQGRSLF | 78 | 819.4603 | 7 | 1 | 42.86 | Non-toxin | Probable allergen |
| **206** | NRPMAF | 78 | 734.3533 | 6 | 1 | 66.67 | Non-toxin | Probable allergen |
| **207** | LELPNWGQEQQEK | 78 | 1597.774 | 13 | -2 | 30.77 | Non-toxin | Probable non-allergen |
| **208** | YDLTTAGGQ | 78 | 924.4189 | 9 | -1 | 22.22 | Non-toxin | Probable allergen |
| **209** | VVEQRGH | 78 | 823.4301 | 7 | 0.1 | 28.57 | Non-toxin | Probable non-allergen |
| **210** | MMNDRVS | 78 | 867.3579 | 7 | 0 | 42.86 | Non-toxin | Probable allergen |
| **211** | LAGSEQAPSKS | 78 | 1073.535 | 11 | 0 | 36.36 | Non-toxin | Probable allergen |
| **212** | NVVNMH | 78 | 713.3167 | 6 | 0.1 | 50 | Non-toxin | Probable non-allergen |
| **213** | YTDLSAAGH | 78 | 933.4192 | 9 | -0.9 | 33.33 | Non-toxin | Probable non-allergen |
| **214** | VAVLSAN | 78 | 672.3806 | 7 | 0 | 71.43 | Non-toxin | Probable non-allergen |
| **215** | SVDEAGEAQFK | 78 | 1179.541 | 11 | -2 | 36.36 | Non-toxin | Probable allergen |
| **216** | LYNPRG | 78 | 718.3762 | 6 | 1 | 36.36 | Non-toxin | Probable non-allergen |
| **217** | FGRERP | 78 | 760.398 | 6 | 1 | 33.33 | Non-toxin | Probable non-allergen |
| **218** | LAGKPGR | 78 | 697.4235 | 7 | 2 | 42.86 | Non-toxin | Probable non-allergen |
| **219** | FWNPVST | 78 | 850.3861 | 7 | 0 | 57.14 | Non-toxin | Probable non-allergen |
| **220** | NLDHPT | 78 | 695.3239 | 6 | -0.9 | 33.33 | Non-toxin | Probable non-allergen |
| **221** | NLSTLLT | 78 | 761.4171 | 7 | 0 | 42.86 | Non-toxin | Probable non-allergen |
| **222** | MAPEEVLM | 78 | 918.4191 | 8 | -2 | 75 | Non-toxin | Probable non-allergen |
| **223** | NPGTHNP | 78 | 736.314 | 7 | 0.1 | 28.57 | Non-toxin | Probable non-allergen |
| **224** | LVFHTKC | 78 | 903.4636 | 7 | 1 | 42.86 | Non-toxin | Probable non-allergen |
| **225** | KLKSENDFGVGKLV | 77 | 1533.84 | 14 | 1 | 35.71 | Non-toxin | Probable non-allergen |
| **226** | FRVADH | 77 | 743.3715 | 6 | 0.1 | 50 | Non-toxin | Probable allergen |
| **227** | FLNMSAEKGTLFPNS | 77 | 1655.786 | 15 | 0 | 46.67 | Non-toxin | Probable allergen |
| **228** | FSGSSSR | 77 | 726.3297 | 7 | 1 | 14.29 | Non-toxin | Probable non-allergen |
| **229** | VNRMH | 77 | 672.3013 | 5 | 1.1 | 40 | Non-toxin | Probable allergen |
| **230** | RMGAATEELEGR | 77 | 1318.63 | 12 | -1 | 33.33 | Non-toxin | Probable allergen |
| **231** | EVGHAFP | 77 | 755.3602 | 7 | -0.9 | 57.14 | Non-toxin | Probable non-allergen |
| **232** | HTLSDMEKF | 77 | 1106.507 | 9 | -0.9 | 33.33 | Non-toxin | Probable non-allergen |
| **233** | QKQDPVMKNPQQH | 77 | 1592.773 | 13 | 1.1 | 30.77 | Non-toxin | Probable non-allergen |
| **234** | QFGDRHQK | 77 | 1014.5 | 8 | 1.1 | 12.5 | Non-toxin | Probable allergen |
| **235** | LAGSEPQASKSEKT | 77 | 1431.721 | 14 | 0 | 28.57 | Non-toxin | Probable non-allergen |
| **236** | LSREEAET | 77 | 933.4403 | 8 | -2 | 25 | Non-toxin | Probable allergen |
| **237** | VEGSLLQ | 77 | 744.4017 | 7 | -1 | 42.86 | Non-toxin | Probable allergen |
| **238** | QLNNSNNANQLDQNRP | 77 | 1839.846 | 16 | 0 | 25 | Non-toxin | Probable allergen |
| **239** | SNLDAREPS | 77 | 987.4621 | 9 | -1 | 33.33 | Non-toxin | Probable allergen |
| **240** | LASVVDVT | 77 | 802.4436 | 8 | -1 | 62.5 | Non-toxin | Probable allergen |
| **241** | FSTDRHQQLE | 77 | 1259.589 | 10 | -0.9 | 20 | Non-toxin | Probable allergen |
| **242** | LLEPNWGQEQQ | 77 | 1340.636 | 11 | -2 | 36.36 | Non-toxin | Probable allergen |
| **243** | NTVENKVGNADLY | 77 | 1436.678 | 13 | -1 | 30.77 | Non-toxin | Probable non-allergen |
| **244** | SGRSPAAM | 77 | 775.3647 | 8 | 1 | 50 | Non-toxin | Probable non-allergen |
| **245** | FLAGAVAASW | 77 | 991.5127 | 10 | 0 | 80 | Non-toxin | Probable non-allergen |
| **246** | NLKEGGGLF | 77 | 933.4919 | 9 | 0 | 33.33 | Non-toxin | Probable allergen |
| **247** | MDALATHLP | 77 | 967.4797 | 9 | -0.9 | 66.67 | Non-toxin | Probable allergen |
| **248** | YMKKAMM | 77 | 917.4173 | 7 | 2 | 57.14 | Non-toxin | Probable allergen |
| **249** | NAREPS | 77 | 673.3031 | 6 | 0 | 33.33 | Non-toxin | Probable non-allergen |
| **250** | VLTGNGSGLARR | 77 | 1200.658 | 12 | 2 | 33.33 | Non-toxin | Probable allergen |
| **251** | LEPQSMNVLQQGAW | 77 | 1599.772 | 14 | -1 | 50 | Non-toxin | Probable allergen |
| **252** | LRFHGE | 77 | 757.3871 | 6 | 0.1 | 33.33 | Non-toxin | Probable allergen |
| **253** | QNMGFEWV | 77 | 1009.433 | 8 | -1 | 50 | Non-toxin | Probable allergen |
| **254** | EATTLE | 77 | 662.3123 | 6 | -2 | 33.33 | Non-toxin | Probable allergen |
| **255** | FFSRGESTAPPF | 77 | 1341.635 | 12 | 0 | 50 | Non-toxin | Probable non-allergen |
| **256** | HLLKPPM | 76 | 850.4734 | 7 | 1.1 | 71.43 | Non-toxin | Probable non-allergen |
| **257** | LVTTSGY | 76 | 739.3752 | 7 | 0 | 28.57 | Non-toxin | Probable non-allergen |
| **258** | VFRAAL | 76 | 675.4067 | 6 | 1 | 83.33 | Non-toxin | Probable non-allergen |
| **259** | VMMEYVTAVP | 76 | 1138.54 | 10 | -1 | 70 | Non-toxin | Probable allergen |
| **260** | LTNEDDARK | 76 | 1061.499 | 9 | -1 | 22.22 | Non-toxin | Probable allergen |
| **261** | LYNNPR | 76 | 775.3976 | 6 | 1 | 33.33 | Non-toxin | Probable allergen |
| **262** | DFMLMK | 76 | 783.3659 | 6 | 0 | 66.67 | Non-toxin | Probable non-allergen |
| **263** | LQPRY | 76 | 675.3704 | 5 | 1 | 40 | Non-toxin | Probable non-allergen |
| **264** | LTGEGYKEMVN | 76 | 1239.581 | 11 | -1 | 27.27 | Non-toxin | Probable allergen |
| **265** | DLRVNYW | 76 | 964.4766 | 7 | 0 | 42.86 | Non-toxin | Probable non-allergen |
| **266** | TLNHFCAA | 76 | 933.4014 | 8 | 0 | 50 | Non-toxin | Probable non-allergen |
| **267** | WTPMVAVGW | 76 | 1061.501 | 9 | 0 | 77.78 | Non-toxin | Probable non-allergen |
| **268** | MTHLR | 76 | 672.3377 | 5 | 1.1 | 40 | Non-toxin | Probable allergen |
| **269** | HLAVTNN | 76 | 767.3926 | 7 | 0.1 | 42.86 | Non-toxin | Probable non-allergen |
| **270** | YTNAPR | 76 | 720.3555 | 6 | 1 | 33.33 | Non-toxin | Probable non-allergen |
| **271** | NKAPYTE | 76 | 821.3919 | 7 | 0 | 28.57 | Non-toxin | Probable allergen |
| **272** | ARVGDLH | 76 | 766.4086 | 7 | 0.1 | 42.86 | Non-toxin | Probable allergen |
| **273** | SLAFDVDEEKEAK | 76 | 1479.709 | 13 | -3 | 38.46 | Non-toxin | Probable allergen |
| **274** | LLHAMRN | 76 | 869.4542 | 7 | 1.1 | 57.14 | Non-toxin | Probable non-allergen |
| **275** | ACKSAEKGTLFPN | 76 | 1421.697 | 13 | 0.9 | 38.46 | Non-toxin | Probable non-allergen |
| **276** | DMHRLP | 76 | 767.3748 | 6 | 0.1 | 50 | Non-toxin | Probable allergen |
| **277** | ELPNWGGAEQQQEK | 76 | 1612.748 | 14 | -2 | 28.57 | Non-toxin | Probable allergen |
| **278** | MVLPEYESGLCGH | 76 | 1490.653 | 13 | -2 | 38.46 | Non-toxin | Probable non-allergen |
| **279** | YLEAGH | 76 | 688.318 | 6 | -0.9 | 33.33 | Non-toxin | Probable allergen |
| **280** | HLLFAK | 76 | 727.438 | 6 | 1.1 | 66.67 | Non-toxin | Probable non-allergen |
| **281** | LNQGAGVP | 76 | 754.3973 | 8 | 0 | 50 | Non-toxin | Probable non-allergen |
| **282** | SVAAGVNKV | 76 | 843.4814 | 9 | 1 | 55.56 | Non-toxin | Probable non-allergen |
| **283** | LFGPVGPRVK | 76 | 1068.644 | 10 | 2 | 60 | Non-toxin | Probable non-allergen |
| **284** | EGLQVGSRA | 76 | 915.4774 | 9 | 0 | 33.33 | Non-toxin | Probable non-allergen |
| **285** | MAGLGVLAAM | 76 | 964.4722 | 10 | 0 | 80 | Non-toxin | Probable non-allergen |
| **286** | AANPGPTGH | 76 | 821.3668 | 9 | 0.1 | 44.44 | Non-toxin | Probable allergen |
| **287** | DSKLRN | 76 | 731.3926 | 6 | 1 | 16.67 | Non-toxin | Probable allergen |
| **288** | AQRPELAQQ | 75 | 1039.541 | 9 | 0 | 44.44 | Non-toxin | Probable allergen |
| **289** | TTVTAKKLYSH | 75 | 1247.687 | 11 | 2.1 | 27.27 | Non-toxin | Probable non-allergen |
| **290** | MMNNRVS | 75 | 851.363 | 7 | 1 | 42.86 | Non-toxin | Probable non-allergen |
| **291** | GRPNKLY | 75 | 846.4711 | 7 | 2 | 28.57 | Non-toxin | Probable non-allergen |
| **292** | VAGAVLKPPL | 75 | 963.6116 | 10 | 1 | 80 | Non-toxin | Probable non-allergen |
| **293** | EPATGHL | 75 | 723.3552 | 7 | -0.9 | 42.86 | Non-toxin | Probable non-allergen |
| **294** | RAHHLP | 75 | 729.4034 | 6 | 1.2 | 50 | Non-toxin | Probable non-allergen |
| **295** | LVSGPYMAGVKP | 75 | 1233.643 | 12 | 1 | 58.33 | Non-toxin | Probable allergen |
| **296** | QVAGVHP | 75 | 706.3762 | 7 | 0.1 | 57.14 | Non-toxin | Probable allergen |
| **297** | LSAMDLTQETAGVKL | 75 | 1592.797 | 15 | -1 | 46.67 | Non-toxin | Probable non-allergen |
| **298** | LKVLPNHPW | 75 | 1102.629 | 9 | 1.1 | 66.67 | Non-toxin | Probable allergen |
| **299** | LNGTELQ | 75 | 773.3919 | 7 | -1 | 28.57 | Non-toxin | Probable non-allergen |
| **300** | VKTWAKVELV | 75 | 1171.697 | 10 | 1 | 60 | Non-toxin | Probable allergen |
| **301** | QGAKSGLGY | 75 | 879.445 | 9 | 1 | 22.22 | Non-toxin | Probable allergen |
| **302** | LKTAVMGVGE | 75 | 1003.537 | 10 | 0 | 50 | Non-toxin | Probable non-allergen |
| **303** | NYHNPP | 75 | 740.3242 | 6 | 0.1 | 33.33 | Non-toxin | Probable allergen |
| **304** | VFDGEVGVEGKM | 75 | 1265.596 | 12 | -2 | 41.67 | Non-toxin | Probable non-allergen |
| **305** | ARYDAGRP | 75 | 904.4515 | 8 | 1 | 37.5 | Non-toxin | Probable allergen |
| **306** | VTKGEVVAGTVV | 75 | 1157.666 | 12 | 0 | 50 | Non-toxin | Probable non-allergen |
| **307** | APAQEQMQR | 75 | 1057.498 | 9 | 0 | 44.44 | Non-toxin | Probable non-allergen |
| **308** | TVPVRSNNK | 75 | 1013.562 | 9 | 2 | 33.33 | Non-toxin | Probable allergen |
| **309** | FEQGSRVL | 75 | 934.4872 | 8 | 0 | 37.5 | Non-toxin | Probable non-allergen |
| **310** | LNLDVMNPMLPV | 75 | 1371.678 | 12 | -1 | 75 | Non-toxin | Probable non-allergen |
| **311** | MKNANVVMTPPN | 75 | 1314.642 | 12 | 1 | 58.33 | Non-toxin | Probable non-allergen |
| **312** | VLKSLLSP | 75 | 855.5429 | 8 | 1 | 62.5 | Non-toxin | Alg prob |
| **313** | FVDRHKQ | 74 | 928.4879 | 7 | 1.1 | 28.57 | Non-toxin | Probable allergen |
| **314** | FVDVGHKAR | 74 | 1027.556 | 9 | 1.1 | 44.44 | Non-toxin | Probable non-allergen |
| **315** | FEGAVGSGVLAL | 74 | 1118.597 | 12 | -1 | 58.33 | Non-toxin | Probable non-allergen |
| **316** | LKMVNNRSVPVLL | 74 | 1482.859 | 13 | 2 | 61.54 | Non-toxin | Probable allergen |
| **317** | LAFGRV | 74 | 661.3911 | 6 | 1 | 66.67 | Non-toxin | Probable non-allergen |
| **318** | LDMSAEK | 74 | 808.3636 | 7 | -1 | 42.86 | Non-toxin | Probable allergen |
| **319** | MKKLPSRP | 74 | 955.5637 | 8 | 3 | 50 | Non-toxin | Probable non-allergen |
| **320** | EGTALNL | 74 | 716.3704 | 7 | -1 | 42.86 | Non-toxin | Probable non-allergen |
| **321** | LRSNEASK | 74 | 904.4614 | 8 | 1 | 25 | Non-toxin | Probable allergen |
| **322** | NVNGQRV | 74 | 786.3984 | 7 | 1 | 28.57 | Non-toxin | Probable allergen |
| **323** | LSLSSSLHPNP | 74 | 1150.598 | 11 | 0.1 | 45.45 | Non-toxin | Probable allergen |
| **324** | AETFSVGP | 74 | 806.381 | 8 | -1 | 50 | Non-toxin | Probable allergen |
| **325** | WVLGLPVK | 74 | 910.564 | 8 | 1 | 75 | Non-toxin | Probable allergen |
| **326** | HRLPLLS | 74 | 834.5076 | 7 | 1.1 | 57.14 | Non-toxin | Probable allergen |
| **327** | DPNGNGSSE | 74 | 875.3257 | 9 | -2 | 11.11 | Non-toxin | Probable allergen |
| **328** | VDSPSRA | 74 | 730.361 | 7 | 0 | 42.86 | Non-toxin | Probable non-allergen |
| **329** | EAVVAGSNK | 74 | 873.4556 | 9 | 0 | 44.44 | Non-toxin | Probable non-allergen |
| **330** | YACLKVK | 74 | 880.484 | 7 | 1.9 | 42.86 | Non-toxin | Probable allergen |
| **331** | YVVVPVVF | 74 | 920.5371 | 8 | 0 | 87.5 | Non-toxin | Probable non-allergen |
| **332** | LFKLRT | 74 | 776.4908 | 6 | 2 | 50 | Non-toxin | Probable non-allergen |
| **333** | DPVVALV | 74 | 711.4167 | 7 | -1 | 85.71 | Non-toxin | Probable non-allergen |
| **334** | QNAMLAH | 74 | 800.3487 | 7 | 0.1 | 57.14 | Non-toxin | Probable non-allergen |
| **335** | GLPVVDV | 74 | 697.401 | 7 | -1 | 71.43 | Non-toxin | Probable allergen |
| **336** | RENHPPR | 74 | 904.4627 | 7 | 1.1 | 28.57 | Non-toxin | Probable non-allergen |
| **337** | HHDAKH | 73 | 743.3463 | 6 | 0.3 | 16.67 | Non-toxin | Probable non-allergen |
| **338** | NSVLDLLQR | 73 | 1056.593 | 9 | 0 | 44.44 | Non-toxin | Probable non-allergen |
| **339** | LSPGAKH | 73 | 708.3918 | 7 | 1.1 | 42.86 | Non-toxin | Probable allergen |
| **340** | MPKATTNAKNL | 73 | 1187.633 | 11 | 2 | 45.45 | Non-toxin | Probable non-allergen |
| **341** | EPLLKPLM | 73 | 939.5463 | 8 | 0 | 75 | Non-toxin | Probable non-allergen |
| **342** | HPPFSWAKDPPT | 73 | 1378.667 | 12 | 0.1 | 58.33 | Non-toxin | Probable non-allergen |
| **343** | MDGSPPVSE | 73 | 933.3749 | 9 | -2 | 44.44 | Non-toxin | Probable non-allergen |
| **344** | WNDLNHKSNKNN | 73 | 1482.696 | 12 | 1.1 | 16.67 | Non-toxin | Peob no alg |
| **345** | NKDVVLVAASPKP | 73 | 1336.772 | 13 | 1 | 61.54 | Non-toxin | Probable allergen |
| **346** | NVSTAQN | 73 | 732.3402 | 7 | 0 | 28.57 | Non-toxin | Probable non-allergen |
| **347** | LMLFLLME | 73 | 1008.539 | 8 | -1 | 87.5 | Non-toxin | Probable non-allergen |
| **348** | PAPPAAFAMH | 73 | 1008.485 | 10 | 0.1 | 90 | Non-toxin | Probable non-allergen |
| **349** | VHPAREV | 73 | 806.4399 | 7 | 0.1 | 57.14 | Non-toxin | Probable non-allergen |
| **350** | LDMHNHVK | 73 | 992.4862 | 8 | 0.2 | 37.5 | Non-toxin | Probable allergen |
| **351** | LVETTLT | 73 | 775.4327 | 7 | -1 | 42.86 | Non-toxin | Probable allergen |
| **352** | YVMSTMHTLFPN | 73 | 1455.653 | 12 | 0.1 | 50 | Non-toxin | Probable non-allergen |
| **353** | PMGSLFMGYDF | 73 | 1263.53 | 11 | -1 | 54.55 | Non-toxin | Probable non-allergen |
| **354** | KSVALNNK | 73 | 872.5079 | 8 | 2 | 37.5 | Non-toxin | Probable non-allergen |
| **355** | VLFALGGSV | 73 | 861.496 | 9 | 0 | 66.67 | Non-toxin | Probable non-allergen |
| **356** | MKKLNGY | 73 | 852.4528 | 7 | 2 | 28.87 | Non-toxin | Probable non-allergen |
| **357** | YAKTNDGQ | 73 | 895.4036 | 8 | 0 | 12.5 | Non-toxin | Probable allergen |
| **358** | MPVPDMM | 73 | 851.3228 | 7 | -1 | 85.71 | Non-toxin | Probable allergen |
| **359** | ENRLRL | 73 | 799.4664 | 6 | 1 | 33.33 | Non-toxin | Probable non-allergen |
| **360** | YLGVNET | 73 | 794.381 | 7 | -1 | 28.57 | Non-toxin | Probable non-allergen |
| **361** | VLALPSTTLSAS | 73 | 1158.65 | 12 | 0 | 58.33 | Non-toxin | Probable allergen |
| **362** | TELAASAYASVLPL | 72 | 1404.75 | 14 | -1 | 64.29 | Non-toxin | Probable non-allergen |
| **363** | RGAPGTTGPHPTHNQ | 72 | 1526.734 | 15 | 1.2 | 26.67 | Non-toxin | Probable allergen |
| **364** | LLGPGYEQ | 72 | 875.4388 | 8 | -1 | 37.5 | Non-toxin | Probable allergen |
| **365** | SANHGVPPR | 72 | 934.462 | 9 | 1.1 | 44.44 | Non-toxin | Probable non-allergen |
| **366** | MYDMNANGALDKNPDK | 72 | 1796.771 | 16 | -1 | 37.5 | Non-toxin | Probable non-allergen |
| **367** | LLYGATAAGPGGEATSE | 72 | 1563.742 | 17 | -2 | 41.18 | Non-toxin | Probable allergen |
| **368** | LTTTASF | 72 | 739.3752 | 7 | 0 | 42.86 | Non-toxin | Probable non-allergen |
| **369** | TKNLWGGPP | 72 | 968.5079 | 9 | 1 | 44.44 | Non-toxin | Probable allergen |
| **370** | FLLAMKVH | 72 | 957.547 | 8 | 1.1 | 75 | Non-toxin | Probable non-allergen |
| **371** | ESSSMLK | 72 | 780.3687 | 7 | 0 | 28.57 | Non-toxin | Probable allergen |
| **372** | MLVALLSP | 72 | 842.4935 | 8 | 0 | 87.5 | Non-toxin | Probable non-allergen |
| **373** | SVLHLTGF | 72 | 872.4756 | 8 | 0.1 | 50 | Non-toxin | Probable non-allergen |
| **374** | YDVSAEKGTLMPNS | 72 | 1526.692 | 14 | -1 | 35.71 | Non-toxin | Probable non-allergen |
| **375** | KLNRLY | 72 | 806.465 | 6 | 2 | 33.33 | Non-toxin | Probable non-allergen |
| **376** | VVVTNNGP | 72 | 798.4236 | 8 | 0 | 50 | Non-toxin | Probable allergen |
| **377** | LHVHGSAH | 72 | 856.4304 | 8 | 0.3 | 37.5 | Non-toxin | Probable non-allergen |
| **378** | FSGGNPPGPVS | 72 | 1015.461 | 11 | 0 | 45.45 | Non-toxin | Probable non-allergen |
| **379** | HRKVESH | 72 | 891.4675 | 7 | 1.2 | 14.29 | Non-toxin | Probable non-allergen |
| **380** | VMENLGGKMV | 72 | 1077.52 | 10 | 0 | 50 | Non-toxin | Probable non-allergen |
| **381** | EVEKGAAH | 72 | 839.4137 | 8 | -0.9 | 37.5 | Non-toxin | Probable allergen |
| **382** | AVSDREA | 72 | 746.3558 | 7 | -1 | 42.86 | Non-toxin | Probable non-allergen |
| **383** | WEMAAPP | 72 | 800.3527 | 7 | -1 | 85.71 | Non-toxin | Probable non-allergen |
| **384** | DVKVASAEH | 71 | 954.4771 | 9 | -0.9 | 44.44 | Non-toxin | Probable allergen |
| **385** | MVLPEYEVCTNSH | 71 | 1577.685 | 13 | -2 | 38.46 | Non-toxin | Probable allergen |
| **386** | YPLYMGVMV | 71 | 1071.513 | 9 | 0 | 66.67 | Non-toxin | Probable allergen |
| **387** | PMGVGPLVL | 71 | 897.4993 | 9 | 0 | 77.78 | Non-toxin | Probable non-allergen |
| **388** | WAGVDGR | 71 | 759.3664 | 7 | 0 | 42.86 | Non-toxin | Probable non-allergen |
| **389** | NVSKGPE | 71 | 729.3657 | 7 | 0 | 28.57 | Non-toxin | Probable non-allergen |
| **390** | HPVMNVLKK | 71 | 1064.617 | 9 | 2.1 | 55.56 | Non-toxin | Probable non-allergen |
| **391** | VGLTWSR | 71 | 817.4446 | 7 | 1 | 42.86 | Non-toxin | Probable non-allergen |
| **392** | YLVTGNGV | 71 | 821.4283 | 8 | 0 | 37.5 | Non-toxin | Probable non-allergen |
| **393** | MPSVGNVGAE | 71 | 959.4382 | 10 | -1 | 50 | Non-toxin | Probable allergen |
| **394** | RDGMATSVSSV | 71 | 1108.518 | 11 | 0 | 36.36 | Non-toxin | Probable allergen |
| **395** | WLASPVGGK | 71 | 913.5021 | 9 | 1 | 55.56 | Non-toxin | Probable non-allergen |
| **396** | LTGHKAP | 71 | 722.4075 | 7 | 1.1 | 42.86 | Non-toxin | Probable non-allergen |
| **397** | MEKRGSVLA | 71 | 1005.528 | 9 | 1 | 44.44 | Non-toxin | Probable allergen |
| **398** | YPGNALGLP | 71 | 901.4545 | 9 | 0 | 55.56 | Non-toxin | Probable non-allergen |
| **399** | WVFKPMG | 71 | 863.4363 | 7 | 1 | 71.43 | Non-toxin | Probable non-allergen |
| **400** | PNVNNGQEGVLET | 71 | 1370.631 | 13 | -2 | 30.77 | Non-toxin | Probable allergen |
| **401** | KLVGLPF | 70 | 772.4847 | 7 | 1 | 71.43 | Non-toxin | Probable allergen |
| **402** | HPLNSFSLQ | 70 | 1041.524 | 9 | 0.1 | 44.44 | Non-toxin | Probable allergen |
| **403** | MPHSSALFGLY | 70 | 1221.585 | 11 | 0.1 | 54.55 | Non-toxin | Probable non-allergen |
| **404** | FRAFPL | 70 | 749.4224 | 6 | 1 | 83.33 | Non-toxin | Probable allergen |
| **405** | WKTLFPNS | 70 | 991.5127 | 8 | 1 | 50 | Non-toxin | Probable allergen |
| **406** | DLKHMP | 70 | 739.3687 | 6 | 0.1 | 50 | Non-toxin | Probable non-allergen |
| **407** | LALDLNMPY | 70 | 1048.526 | 9 | -1 | 66.67 | Non-toxin | Probable allergen |
| **408** | NGMGFEWV | 70 | 938.3956 | 8 | -1 | 50 | Non-toxin | Probable non-allergen |
| **409** | AVPVGTAGLNKSKGM | 70 | 1429.76 | 15 | 2 | 46.67 | Non-toxin | Probable non-allergen |
| **410** | QNLHSGV | 70 | 753.377 | 7 | 0.1 | 28.57 | Non-toxin | Probable non-allergen |
| **411** | DAGAFGQPVK | 70 | 988.4977 | 10 | 0 | 50 | Non-toxin | Probable non-allergen |
| **412** | KPTSVAPK | 70 | 826.4912 | 8 | 2 | 50 | Non-toxin | Probable non-allergen |
| **413** | AVGAHMER | 70 | 869.4178 | 8 | 0.1 | 50 | Non-toxin | Probable non-allergen |
| **414** | EGAMNPP | 70 | 715.2847 | 7 | -1 | 57.14 | Non-toxin | Probable non-allergen |
| **415** | FPSLMLAKEA | 70 | 1121.579 | 10 | 0 | 70 | Non-toxin | Alg rpob |
| **416** | NGASAALLM | 70 | 846.4269 | 9 | 0 | 66.67 | Non-toxin | Probable non-allergen |
| **417** | FLAEESLGLDAQM | 70 | 1422.67 | 13 | -3 | 53.85 | Non-toxin | Probable allergen |
| **418** | ENPGPAATY | 70 | 919.3923 | 9 | -1 | 44.44 | Non-toxin | Probable non-allergen |
| **419** | PMKNGHEDLTHK | 70 | 1405.677 | 12 | 0.2 | 25 | Non-toxin | Probable non-allergen |
| **420** | SMLSPH | 70 | 670.3109 | 6 | 0.1 | 50 | Non-toxin | Probable non-allergen |
| **421** | LVGLMHAGSHSD | 70 | 1238.571 | 12 | -0.8 | 41.67 | Non-toxin | Probable non-allergen |
| **422** | HLAMYSNA | 70 | 905.4066 | 8 | 0.1 | 50 | Non-toxin | Probable allergen |
| **423** | EDLLAVGP | 70 | 812.4279 | 8 | -2 | 62.5 | Non-toxin | Probable non-allergen |
| **424** | RGVPFPM | 70 | 818.4109 | 7 | 1 | 71.43 | Non-toxin | Probable allergen |
| **425** | LLPHGAV | 70 | 705.4174 | 7 | 0.1 | 71.43 | Non-toxin | Probable non-allergen |
| **426** | MVVGHDLLY | 70 | 1045.527 | 9 | -0.9 | 55.56 | Non-toxin | Probable non-allergen |
| **427** | SPLVNH | 70 | 665.3497 | 6 | 0.1 | 50 | Non-toxin | Probable allergen |
| **428** | FVENPPVF | 70 | 948.4592 | 8 | -1 | 75 | Non-toxin | Probable non-allergen |
| **429** | EGAHGMGED | 70 | 901.3235 | 9 | -2.9 | 22.22 | Non-toxin | Probable allergen |
| **430** | DMLTLK | 70 | 719.3887 | 6 | 0 | 50 | Non-toxin | Probable non-allergen |
| **431** | YNAAMASL | 70 | 839.3847 | 8 | 0 | 62.5 | Non-toxin | Probable allergen |
| **432** | MASAPNLTEF | 70 | 1079.496 | 10 | -1 | 60 | Non-toxin | Probable non-allergen |
| **433** | VFDGGAVGVEGKVL | 70 | 1345.724 | 14 | -1 | 50 | Non-toxin | Probable non-allergen |
| **434** | VQVMPANGSTAARE | 70 | 1445.693 | 14 | 0 | 50 | Non-toxin | Probable allergen |
| **435** | EVKSVR | 69 | 716.418 | 6 | 1 | 33.33 | Non-toxin | Probable non-allergen |
| **436** | EEDTPL | 69 | 702.3072 | 6 | -3 | 33.33 | Non-toxin | Probable allergen |
| **437** | SVVAKAPVGKR | 69 | 1110.687 | 11 | 3 | 54.55 | Non-toxin | Probable allergen |
| **438** | MMDGKSNNSADKV | 69 | 1395.612 | 13 | 0 | 30.77 | Non-toxin | Probable non-allergen |
| **439** | YGAGK | 69 | 494.2489 | 5 | 1 | 20 | Non-toxin | Probable allergen |
| **440** | WVNMAHGEARE | 69 | 1298.583 | 11 | -0.9 | 45.45 | Non-toxin | Probable non-allergen |
| **441** | EGPPAYQ | 69 | 760.3391 | 7 | -1 | 42.86 | Non-toxin | Probable non-allergen |
| **442** | WLAKSVK | 69 | 830.5014 | 7 | 2 | 57.14 | Non-toxin | Probable non-allergen |
| **443** | RTNPVR | 69 | 741.4246 | 6 | 2 | 33.33 | Non-toxin | Probable non-allergen |
| **444** | FGMFVNLHAE | 69 | 1163.544 | 10 | -0.9 | 60 | Non-toxin | Probable allergen |
| **445** | RAALAQT | 69 | 729.4133 | 7 | 1 | 57.14 | Non-toxin | Probable non-allergen |
| **446** | WGSGGLAAGD | 69 | 889.3929 | 10 | -1 | 40 | Non-toxin | Probable non-allergen |
| **447** | EANPPPK | 69 | 751.3864 | 7 | 0 | 57.14 | Non-toxin | Probable non-allergen |
| **448** | MTPPMDTLLP | 69 | 1114.54 | 10 | -1 | 70 | Non-toxin | Probable non-allergen |
| **449** | YVGEKT | 69 | 695.349 | 6 | 0 | 16.67 | Non-toxin | Probable allergen |
| **450** | SFREEEKGPFPP | 69 | 1418.683 | 12 | -1 | 41.67 | Non-toxin | Probable non-allergen |
| **451** | NLNHSTP | 69 | 782.3559 | 7 | 0.1 | 28.57 | Non-toxin | Probable non-allergen |
| **452** | LPAAAHQ | 69 | 706.3762 | 7 | 0.1 | 71.43 | Non-toxin | Probable allergen |
| **453** | KLVVDLVPMPP | 69 | 1206.705 | 11 | 0 | 81.82 | Non-toxin | Probable non-allergen |
| **454** | KLALRP | 69 | 696.4646 | 6 | 2 | 66.67 | Non-toxin | Probable non-allergen |
| **455** | KDVEVLL | 69 | 814.48 | 7 | -1 | 57.14 | Non-toxin | Probable non-allergen |
| **456** | KLAATHN | 69 | 753.4133 | 7 | 1.1 | 42.86 | Non-toxin | Probable allergen |
| **457** | RLSGNPNNAL | 69 | 1055.536 | 10 | 1 | 40 | Non-toxin | Probable allergen |
| **458** | HPPMLST | 69 | 781.3793 | 7 | 0.1 | 57.14 | Non-toxin | Prob no alg |
| **459** | RVSLNPPK | 69 | 909.5396 | 8 | 2 | 50 | Non-toxin | Alg prob |
| **460** | RSVGAGGTAVSPL | 69 | 1170.636 | 13 | 1 | 46.15 | Non-toxin | Probable non-allergen |
| **461** | MLKVMLPL | 69 | 975.5497 | 8 | 1 | 87.5 | Non-toxin | Probable allergen |
| **462** | TEVSGGNGL | 69 | 832.3926 | 9 | -1 | 22.22 | Non-toxin | Probable non-allergen |
| **463** | ESKDERGPLV | 68 | 1128.577 | 10 | -1 | 30 | Non-toxin | Probable non-allergen |
| **464** | SSSLAGPPALLL | 68 | 1124.644 | 12 | 0 | 66.67 | Non-toxin | Probable non-allergen |
| **465** | MVQDRVD | 68 | 877.3964 | 7 | -1 | 42.86 | Non-toxin | Probable allergen |
| **466** | VTVGGTQQASVT | 68 | 1146.588 | 12 | 0 | 33.33 | Non-toxin | Probable allergen |
| **467** | MKMQQHLTDGM | 68 | 1334.578 | 11 | 0.1 | 36.36 | Non-toxin | Probable non-allergen |
| **468** | KTPEEGV | 68 | 758.381 | 7 | -1 | 28.57 | Non-toxin | Probable non-allergen |
| **469** | SMLPSPEP | 68 | 856.4 | 8 | -1 | 62.5 | Non-toxin | Probable non-allergen |
| **470** | MMGGDVGVSKGDPY | 68 | 1411.611 | 14 | -1 | 35.71 | Non-toxin | Probable non-allergen |
| **471** | KGPPVVY | 68 | 758.4326 | 7 | 1 | 57.14 | Non-toxin | Probable allergen |
| **472** | NPGPFTT | 68 | 733.3282 | 7 | 0 | 42.86 | Non-toxin | Alg prpb |
| **473** | VGSTLGPR | 68 | 785.4395 | 8 | 1 | 37.5 | Non-toxin | Probable non-allergen |
| **474** | HPPVVVANV | 68 | 931.5127 | 9 | 0.1 | 77.78 | Non-toxin | Probable non-allergen |
| **475** | KDTTPEK | 68 | 817.4182 | 7 | 0 | 14.29 | Non-toxin | Probable allergen |
| **476** | LLDVTSLDDAPV | 68 | 1256.65 | 12 | -3 | 58.33 | Non-toxin | Probable non-allergen |
| **477** | MVVTARNYVN | 68 | 1181.586 | 10 | 1 | 50 | Non-toxin | Probable allergen |
| **478** | HSAKVLAVPP | 68 | 1017.597 | 10 | 1.1 | 70 | Non-toxin | Probable allergen |
| **479** | PDVEFAGPVGKE | 68 | 1243.608 | 12 | -2 | 50 | Non-toxin | Probable non-allergen |
| **480** | TLSRGAST | 68 | 791.4137 | 8 | 1 | 25 | Non-toxin | Probable non-allergen |
| **481** | HMKGTGADTTGFGTGGT | 68 | 1594.705 | 17 | 0.1 | 17.65 | Non-toxin | Probable non-allergen |
| **482** | LTHSSARHS | 68 | 994.4944 | 9 | 1.2 | 22.22 | Non-toxin | Probable non-allergen |
| **483** | MLGAGYEAELF | 68 | 1215.548 | 11 | -2 | 54.55 | Non-toxin | Probable allergen |
| **484** | VVDAHQWK | 68 | 981.5032 | 8 | 0.1 | 50 | Non-toxin | Probable allergen |
| **485** | YYGGVLPL | 68 | 880.4694 | 8 | 0 | 50 | Non-toxin | Probable allergen |
| **486** | HGSSGVGH | 68 | 736.3253 | 8 | 0.2 | 12.5 | Non-toxin | Probable non-allergen |
| **487** | MFAETKTM | 68 | 957.43 | 8 | 0 | 50 | Non-toxin | Probable non-allergen |
| **488** | YSTSHGLL | 68 | 876.4341 | 8 | 0.1 | 25 | Non-toxin | Probable allergen |
| **489** | RLKPFP | 68 | 756.4646 | 6 | 2 | 66.67 | Non-toxin | Alg Prob |
| **490** | VKNLHPP | 68 | 803.4653 | 7 | 1.1 | 57.14 | Non-toxin | Probable non-allergen |
| **491** | SVNVEHN | 68 | 797.3668 | 7 | -0.9 | 28.57 | Non-toxin | Probable allergen |
| **492** | LTFAGPGGNTL | 68 | 1046.54 | 11 | 0 | 45.45 | Non-toxin | Probable non-allergen |
| **493** | KFNPDQPK | 68 | 972.5029 | 8 | 1 | 37.5 | Non-toxin | Probable allergen |
| **494** | KTSNLLMVVTPL | 68 | 1314.758 | 12 | 1 | 58.33 | Non-toxin | Probable non-allergen |
| **495** | MNKAEGLAKLNY | 68 | 1350.697 | 12 | 1 | 41.67 | Non-toxin | Probable non-allergen |
| **496** | EAALASSGN | 68 | 818.377 | 9 | -1 | 44.44 | Non-toxin | Probable allergen |
| **497** | HPKFGAKGGSM | 68 | 1131.55 | 11 | 2.1 | 36.36 | Toxin | Probable allergen |
| **498** | FKSNDPVDC | 68 | 1081.439 | 9 | -1.1 | 33.33 | Non-toxin | Probable non-allergen |
| **499** | NGLALAGADH | 67 | 937.4617 | 10 | -0.9 | 50 | Non-toxin | Probable allergen |
| **500** | GPVGNNGQEGVLETV | 67 | 1469.7 | 15 | -2 | 33.33 | Non-toxin | Probable non-allergen |
| **501** | LAGGGPNNAGKEQKQ | 67 | 1468.727 | 15 | 1 | 26.67 | Non-toxin | Probable non-allergen |
| **502** | DGGGLFSF | 67 | 798.3548 | 8 | -1 | 37.5 | Non-toxin | Probable non-allergen |
| **503** | FVDAKNSHTV | 67 | 1116.556 | 10 | 0.1 | 40 | Non-toxin | Probable allergen |
| **504** | KKGPGNAAD | 67 | 856.4402 | 9 | 1 | 33.33 | Non-toxin | Probable non-allergen |
| **505** | WGAAGFLLAPGGVAH | 67 | 1422.741 | 15 | 0.1 | 66.67 | Non-toxin | Probable non-allergen |
| **506** | FTLGHGSLV | 67 | 929.4971 | 9 | 0.1 | 44.44 | Non-toxin | Probable non-allergen |
| **507** | DPKDNSNPTTQLNQNPR | 67 | 1938.903 | 17 | 0 | 23.53 | Non-toxin | Probable non-allergen |
| **508** | RGGNAGTL | 67 | 744.3878 | 8 | 1 | 25 | Non-toxin | Probable non-allergen |
| **509** | DRLHPTPN | 67 | 948.4777 | 8 | 0.1 | 37.5 | Non-toxin | Probable non-allergen |
| **510** | PVPAHPL | 67 | 729.4173 | 7 | 0.1 | 85.71 | Non-toxin | Probable non-allergen |
| **511** | NPGAKEEAER | 67 | 1099.526 | 10 | -1 | 30 | Non-toxin | Probable non-allergen |
| **512** | MTAGRPGSGK | 67 | 960.4811 | 10 | 2 | 30 | Non-toxin | Probable non-allergen |
| **513** | WLMAMMGSHW | 67 | 1264.519 | 10 | 0.1 | 70 | Non-toxin | Probable non-allergen |
| **514** | KEGGLARD | 67 | 844.4402 | 8 | 0 | 25 | Non-toxin | Probable allergen |
| **515** | MQTYLNLCMV | 67 | 1271.571 | 10 | -0.1 | 50 | Non-toxin | Prob no alg |
| **516** | VLNGALPHAPR | 67 | 1144.635 | 11 | 1.1 | 63.64 | Non-toxin | Probable non-allergen |
| **517** | APSSRGKN | 67 | 815.4249 | 8 | 2 | 25 | Non-toxin | Probable non-allergen |
| **518** | AVQVGGRT | 67 | 786.4348 | 8 | 1 | 37.5 | Non-toxin | Probable allergen |
| **519** | VFGPAAATMM | 67 | 994.4616 | 10 | 0 | 80 | Non-toxin | Probable non-allergen |
| **520** | VLALRGGAAW | 67 | 1012.582 | 10 | 1 | 70 | Non-toxin | Probable allergen |
| **521** | VSGPAVVKR | 67 | 911.5552 | 9 | 2 | 55.56 | Non-toxin | Probable non-allergen |
| **522** | VELGFDAPPF | 67 | 1090.533 | 10 | -2 | 70 | Non-toxin | Probable non-allergen |
| **523** | NNGFLGML | 67 | 864.4164 | 8 | 0 | 50 | Non-toxin | Probable non-allergen |
| **524** | VMSTSVT | 67 | 739.3422 | 7 | 0 | 42.86 | Non-toxin | Probable allergen |
| **525** | QLTDPSAP | 67 | 827.4025 | 8 | -1 | 50 | Non-toxin | Probable non-allergen |
| **526** | FGLGVAM | 67 | 693.352 | 7 | 0 | 71.43 | Non-toxin | Probable non-allergen |
| **527** | RSTGAGPGER | 67 | 986.4893 | 10 | 1 | 20 | Non-toxin | Probable allergen |
| **528** | MLKQEGHDVST | 67 | 1259.582 | 11 | -0.9 | 27.27 | Non-toxin | Probable allergen |
| **529** | MMLAHEMK | 67 | 989.4496 | 8 | 0.1 | 62.5 | Non-toxin | Probable allergen |
| **530** | AAGAALNSPH | 67 | 907.4512 | 10 | 0.1 | 60 | Non-toxin | Probable allergen |
| **531** | LRAVENEV | 67 | 928.4977 | 8 | -1 | 50 | Non-toxin | Probable non-allergen |
| **532** | ELAMVGVEM | 67 | 993.4511 | 9 | -2 | 66.67 | Non-toxin | Probable allergen |
| **533** | VQNNPSAR | 66 | 884.4464 | 8 | 1 | 37.5 | Non-toxin | Probable allergen |
| **534** | LSNNKPT | 66 | 772.4079 | 7 | 1 | 28.57 | Non-toxin | Probable non-allergen |
| **535** | PENNVLAPQ | 66 | 980.4927 | 9 | -1 | 55.56 | Non-toxin | Probable allergen |
| **536** | RAPGAVT | 66 | 670.3762 | 7 | 1 | 57.14 | Non-toxin | Probable allergen |
| **537** | LDMSAEKGTLMAAR | 66 | 1508.733 | 14 | 0 | 50 | Non-toxin | Probable non-allergen |
| **538** | LMMAHSGPPLM | 66 | 1199.55 | 11 | 0.1 | 72.73 | Non-toxin | Probable non-allergen |
| **539** | GWKAASVPETLQN | 66 | 1399.71 | 13 | 0 | 46.15 | Non-toxin | Probable non-allergen |
| **540** | FAATTY | 66 | 672.3119 | 6 | 0 | 50 | Non-toxin | Probable non-allergen |
| **541** | KAEDKVK | 66 | 816.4705 | 7 | 1 | 28.57 | Non-toxin | Probable allergen |
| **542** | YVFGHVVVVP | 66 | 1114.617 | 10 | 0.1 | 70 | Non-toxin | Probable non-allergen |
| **543** | RPESELDAQA | 66 | 1114.525 | 10 | -2 | 40 | Non-toxin | Probable non-allergen |
| **544** | RANTNPVD | 66 | 885.4304 | 8 | 0 | 37.5 | Non-toxin | Probable allergen |
| **545** | LRQSWGVSEF | 66 | 1207.599 | 10 | 0 | 40 | Non-toxin | Probable non-allergen |
| **546** | FGEPHVGAHW | 66 | 1135.52 | 10 | -0.8 | 50 | Non-toxin | Probable non-allergen |
| **547** | GRMAADARREA | 66 | 1202.594 | 11 | 1 | 45.45 | Non-toxin | Probable allergen |
| **548** | LYNPRN | 66 | 775.3976 | 6 | 1 | 33.33 | Non-toxin | Probable allergen |
| **549** | HGVVLLM | 66 | 783.4313 | 7 | 0.1 | 71.43 | Non-toxin | Probable allergen |
| **550** | FDGGAAEVSQ | 66 | 979.4246 | 10 | -2 | 40 | Non-toxin | Probable non-allergen |
| **551** | HAAATGGHK | 66 | 848.4253 | 9 | 1.2 | 33.33 | Non-toxin | Probable non-allergen |
| **552** | FLVGSHEWR | 66 | 1129.567 | 9 | 0.1 | 44.44 | Non-toxin | Probable allergen |
| **553** | RDASDNGEAR | 66 | 1089.48 | 10 | -1 | 20 | Non-toxin | Probable allergen |
| **554** | KGPTSSKF | 66 | 850.4548 | 8 | 2 | 25 | Non-toxin | Probable non-allergen |
| **555** | AAYVTTVAQ | 66 | 922.476 | 9 | 0 | 55.56 | Non-toxin | Probable allergen |
| **556** | RADKPV | 66 | 684.3918 | 6 | 1 | 50 | Non-toxin | Probable allergen |
| **557** | STLNKGTLA | 66 | 904.4866 | 9 | 1 | 33.33 | Non-toxin | Probable non-allergen |
| **558** | KPAMPK | 66 | 670.3836 | 6 | 2 | 66.67 | Non-toxin | Probable non-allergen |
| **559** | DRKVLHSHSTLNR | 66 | 1561.844 | 13 | 2.2 | 23.08 | Non-toxin | Probable allergen |
| **560** | PLGAAHN | 66 | 678.3449 | 7 | 0.1 | 57.14 | Non-toxin | Probable non-allergen |
| **561** | EAGEPRSGASR | 66 | 1115.532 | 11 | 0 | 27.27 | Non-toxin | Probable allergen |
| **562** | PVAMGMPGH | 66 | 911.3994 | 9 | 0.1 | 66.67 | Non-toxin | Probable allergen |
| **563** | AQAGPMLMEM | 66 | 1109.456 | 10 | -1 | 70 | Non-toxin | Probable non-allergen |
| **564** | QGAHPR | 66 | 664.3405 | 6 | 1.1 | 33.33 | Non-toxin | Probable allergen |
| **565** | WGPRDSFE | 66 | 992.4352 | 8 | -1 | 37.5 | Non-toxin | Probable allergen |
| **566** | FSPSQR | 66 | 720.3555 | 6 | 1 | 33.33 | Non-toxin | Probable non-allergen |
| **567** | KVVKMDNQPL | 66 | 1170.643 | 10 | 1 | 50 | Non-toxin | Probable allergen |
| **568** | TGRETP | 66 | 659.3239 | 6 | 0 | 16.67 | Non-toxin | Probable non-allergen |
| **569** | LVLTAVSHGAH | 66 | 1103.609 | 11 | 0.2 | 54.55 | Non-toxin | Probable non-allergen |
| **570** | LRAPNGAESPVMW | 65 | 1426.703 | 13 | 0 | 61.54 | Non-toxin | Probable allergen |
| **571** | MRVKGSL | 65 | 805.448 | 7 | 2 | 42.86 | Non-toxin | Probable non-allergen |
| **572** | FVLKLPP | 65 | 812.516 | 7 | 1 | 85.71 | Non-toxin | Probable non-allergen |
| **573** | DYHPNPR | 65 | 897.4093 | 7 | 0.1 | 28.57 | Non-toxin | Probable allergen |
| **574** | VDLLGSPP | 65 | 796.433 | 8 | -1 | 62.5 | Non-toxin | Probable allergen |
| **575** | VAALAGAH | 65 | 708.3918 | 8 | 0.1 | 75 | Non-toxin | Probable non-allergen |
| **576** | VKSTSVV | 65 | 718.4225 | 7 | 1 | 42.86 | Non-toxin | Probable non-allergen |
| **577** | NNTSVVEAK | 65 | 960.4876 | 9 | 0 | 33.33 | Non-toxin | Probable allergen |
| **578** | WATAAHGT | 65 | 813.377 | 8 | 0.1 | 50 | Non-toxin | Probable non-allergen |
| **579** | RLVAHSSVVKG | 65 | 1151.678 | 11 | 2.1 | 45.45 | Non-toxin | Probable allergen |
| **580** | RRPGLT | 65 | 698.4188 | 6 | 2 | 33.33 | Non-toxin | Probable allergen |
| **581** | HSNKNPRS | 65 | 939.4522 | 8 | 2.1 | 12.5 | Non-toxin | Probable allergen |
| **582** | FVQNPQAGH | 65 | 996.4777 | 9 | 0.1 | 44.44 | Non-toxin | Probable non-allergen |
| **583** | MSMTFV | 65 | 730.303 | 6 | 0 | 66.67 | Non-toxin | Probable allergen |
| **584** | CASGFEWV | 65 | 954.3906 | 8 | -1.1 | 50 | Non-toxin | Probable allergen |
| **585** | KARHSL | 65 | 710.4188 | 6 | 2.1 | 33.33 | Non-toxin | Probable non-allergen |
| **586** | RPYSSE | 65 | 737.3344 | 6 | 0 | 16.67 | Non-toxin | Probable allergen |
| **587** | ESGNGHALGPE | 65 | 1066.468 | 11 | -1.9 | 27.27 | Non-toxin | Probable allergen |
| **588** | LLMVVGKG | 65 | 815.4939 | 8 | 1 | 62.5 | Non-toxin | Probable non-allergen |
| **589** | MMLPGVDVPVLS | 65 | 1256.651 | 12 | -1 | 75 | Non-toxin | Probable allergen |
| **590** | TEMHEGPQ | 65 | 927.3756 | 8 | -1.9 | 25 | Non-toxin | Probable allergen |
| **591** | RNTLAGNLESGGVTHT | 65 | 1625.812 | 16 | 0.1 | 25 | Non-toxin | Probable non-allergen |
| **592** | DKFDSV | 65 | 709.3282 | 6 | -1 | 33.33 | Non-toxin | Probable non-allergen |
| **593** | NVNALPAVPPP | 65 | 1087.603 | 11 | 0 | 81.82 | Non-toxin | Probable non-allergen |
| **594** | KFNGNDNYTWHAAFY | 65 | 1846.806 | 15 | 0.1 | 33.33 | Non-toxin | Probable non-allergen |
| **595** | RGGTAKSH | 65 | 812.4253 | 8 | 2.1 | 12.5 | Non-toxin | Probable non-allergen |
| **596** | PSSHNPTGR | 65 | 951.4522 | 9 | 1.1 | 22.22 | Non-toxin | Probable allergen |
| **597** | KNAVSVGP | 64 | 770.4286 | 8 | 1 | 50 | Non-toxin | Probable allergen |
| **598** | VLARNH | 64 | 708.4031 | 6 | 1.1 | 50 | Non-toxin | Probable allergen |
| **599** | KTAFAH | 64 | 673.3547 | 6 | 1.1 | 50 | Non-toxin | Probable allergen |
| **600** | ESLGAELH | 64 | 854.4134 | 8 | -1.9 | 37.5 | Non-toxin | Probable allergen |
| **601** | FVLTGSVLL | 64 | 947.5692 | 9 | 0 | 66.67 | Non-toxin | Probable allergen |
| **602** | MPFPGTAALSR | 64 | 1162.581 | 11 | 1 | 63.64 | Non-toxin | Probable non-allergen |
| **603** | WAPVLTVGAE | 64 | 1041.55 | 10 | -1 | 70 | Non-toxin | Probable allergen |
| **604** | HVSSHLVM | 64 | 908.4538 | 8 | 0.2 | 50 | Non-toxin | Probable allergen |
| **605** | APAANGGGEEAVV | 64 | 1140.541 | 13 | -2 | 53.85 | Non-toxin | Probable allergen |
| **606** | WFPVDAQQSVL | 64 | 1288.645 | 11 | -1 | 63.64 | Non-toxin | Probable non-allergen |
| **607** | DDMGSNMMVEW | 64 | 1329.468 | 11 | -3 | 45.45 | Non-toxin | Probable non-allergen |
| **608** | RESHGVGK | 64 | 868.4515 | 8 | 1.1 | 12.5 | Non-toxin | Probable non-allergen |
| **609** | RKSSMVPL | 64 | 916.5164 | 8 | 2 | 50 | Non-toxin | Probable non-allergen |
| **610** | MMLASTKADLFPNS | 64 | 1524.732 | 14 | 0 | 57.14 | Non-toxin | Probable non-allergen |
| **611** | STTVLASV | 64 | 776.428 | 8 | 0 | 50 | Non-toxin | Probable non-allergen |
| **612** | LAPPCL | 64 | 669.352 | 6 | -0.1 | 83.33 | Non-toxin | Probable non-allergen |
| **613** | WPPGMAFWTYLHDK | 64 | 1747.818 | 14 | 0.1 | 57.14 | Non-toxin | Probable non-allergen |
| **614** | RTAGASPTATR | 64 | 1087.574 | 11 | 2 | 36.36 | Non-toxin | Probable allergen |
| **615** | RKPAPP | 64 | 664.402 | 6 | 2 | 66.67 | Non-toxin | Probable non-allergen |
| **616** | DAADLSTANLK | 64 | 1117.562 | 11 | -1 | 45.45 | Non-toxin | Probable non-allergen |
| **617** | VVAQAPVFGH | 64 | 1023.55 | 10 | 0.1 | 70 | Non-toxin | Probable allergen |
| **618** | LYSGPPSSLW | 64 | 1105.544 | 10 | 0 | 50 | Non-toxin | Probable non-allergen |
| **619** | AGAHNAM | 64 | 671.2697 | 7 | 0.1 | 57.14 | Non-toxin | Probable non-allergen |
| **620** | GYGVLMN | 64 | 752.3527 | 7 | 0 | 42.86 | Non-toxin | Probable non-allergen |
| **621** | SEKDVKVPEVL | 63 | 1241.687 | 11 | -1 | 45.45 | Non-toxin | Probable non-allergen |
| **622** | AVGANRP | 63 | 683.3715 | 7 | 1 | 57.14 | Non-toxin | Probable allergen |
| **623** | RQKGGM | 63 | 675.3486 | 6 | 2 | 16.67 | Non-toxin | Probable non-allergen |
| **624** | DFTYHEGAL | 63 | 1051.461 | 9 | -1.9 | 33.33 | Non-toxin | Probable allergen |
| **625** | LTVASGDPTLAGW | 63 | 1286.651 | 13 | -1 | 53.85 | Non-toxin | Probable non-allergen |
| **626** | WLPSLESQKKGEMC | 63 | 1691.801 | 14 | -0.1 | 35.71 | Non-toxin | Probable allergen |
| **627** | FVKGTGPR | 63 | 860.4868 | 8 | 2 | 37.5 | Non-toxin | Probable non-allergen |
| **628** | LDKASGGAKNL | 63 | 1072.588 | 11 | 1 | 36.36 | Non-toxin | Probable allergen |
| **629** | MVGSMAAV | 63 | 780.351 | 8 | 0 | 75 | Non-toxin | Probable non-allergen |
| **630** | VTGKAVAVV | 63 | 842.5225 | 9 | 1 | 66.67 | Non-toxin | Probable non-allergen |
| **631** | RHQEMARDPR | 63 | 1310.626 | 10 | 1.1 | 30 | Non-toxin | Alg prob |
| **632** | PFEGSPSGLES | 63 | 1105.493 | 11 | -2 | 36.36 | Non-toxin | Probable allergen |
| **633** | YNGMDPPQQQ | 63 | 1192.482 | 10 | -1 | 30 | Non-toxin | Probable non-allergen |
| **634** | APAAGVTNY | 63 | 862.4185 | 9 | 0 | 55.56 | Non-toxin | Probable non-allergen |
| **635** | DLPLVAL | 63 | 739.4479 | 7 | -1 | 85.71 | Non-toxin | Probable allergen |
| **636** | DPNATMLSPEW | 63 | 1260.533 | 11 | -2 | 54.55 | Non-toxin | Probable non-allergen |
| **637** | MEESAQNYTGEGTFK | 63 | 1690.714 | 15 | -2 | 20 | Non-toxin | Probable allergen |
| **638** | KPNGHTPMNW | 63 | 1196.54 | 10 | 1.1 | 40 | Non-toxin | Probable allergen |
| **639** | DFVLDELV | 63 | 948.4804 | 8 | -3 | 62.5 | Non-toxin | Probable non-allergen |
| **640** | EGHLPKGH | 63 | 873.4457 | 8 | 0.2 | 25 | Non-toxin | Probable non-allergen |
| **641** | RNMMQGSPRN | 63 | 1190.529 | 10 | 2 | 30 | Non-toxin | Probable allergen |
| **642** | WTYNPGLSS | 63 | 1023.466 | 9 | 0 | 33.33 | Non-toxin | Probable non-allergen |
| **643** | NKVTKFVLPP | 63 | 1141.686 | 10 | 2 | 60 | Non-toxin | Probable allergen |
| **644** | VVAGGAMYSK | 63 | 981.4953 | 10 | 1 | 50 | Non-toxin | Probable non-allergen |
| **645** | FRDDRH | 63 | 844.394 | 6 | 0.1 | 16.67 | Non-toxin | Probable allergen |
| **646** | LLRAPK | 63 | 696.4646 | 6 | 2 | 66.67 | Non-toxin | Probable non-allergen |
| **647** | NSSFATR | 63 | 781.3718 | 7 | 1 | 28.57 | Non-toxin | Probable non-allergen |
| **648** | NYHNPPRL | 62 | 1009.509 | 8 | 1.1 | 37.5 | Non-toxin | Probable allergen |
| **649** | KLTDDDMRGK | 62 | 1193.571 | 10 | 0 | 20 | Non-toxin | Probable allergen |
| **650** | FLTNGCADKVLYK | 62 | 1528.76 | 13 | 0.9 | 38.46 | Non-toxin | Probable non-allergen |
| **651** | QVWLGH | 62 | 738.3813 | 6 | 1 | 50 | Non-toxin | Probable non-allergen |
| **652** | CRFFKMYHNGLRD | 62 | 1742.813 | 13 | 2 | 30.77 | Non-toxin | Probable allergen |
| **653** | MSALAACLFGLQ | 62 | 1280.626 | 12 | -0.1 | 66.67 | Non-toxin | Probable non-allergen |
| **654** | VVSTLPAHGAALP | 62 | 1231.692 | 13 | 0.1 | 69.23 | Non-toxin | Probable non-allergen |
| **655** | RMGAATEEEGLSR | 62 | 1405.662 | 13 | -1 | 30.77 | Non-toxin | Probable non-allergen |
| **656** | NPGPNHF | 62 | 782.3347 | 7 | 0.1 | 42.86 | Non-toxin | Probable allergen |
| **657** | HTADGSSSKE | 62 | 1017.436 | 10 | -0.9 | 10 | Non-toxin | Probable non-allergen |
| **658** | PGDPEPA | 62 | 681.2969 | 7 | -2 | 57.14 | Non-toxin | Probable allergen |
| **659** | FTSFAT | 62 | 672.3119 | 6 | 3.44 | 0 | Non-toxin | Probable non-allergen |
| **660** | RTVAAHQ | 62 | 781.4195 | 7 | 1.1 | 42.86 | Non-toxin | Probable allergen |
| **661** | EGTAGLHNQ | 62 | 925.4254 | 9 | -0.9 | 22.22 | Non-toxin | Probable allergen |
| **662** | TTSLAAPVGEA | 62 | 1015.519 | 11 | -1 | 54.55 | Non-toxin | Probable allergen |
| **663** | TPAGPNGHSK | 62 | 964.4726 | 10 | 1.1 | 30 | Non-toxin | Probable allergen |
| **664** | WSDMYNAPG | 62 | 1039.407 | 9 | -1 | 44.44 | Non-toxin | Probable non-allergen |
| **665** | DPPAHSGAPW | 62 | 1033.462 | 10 | -0.9 | 60 | Non-toxin | Probable allergen |
| **666** | HPLALSVT | 62 | 836.4756 | 8 | 0.1 | 62.5 | Non-toxin | Probable allergen |
| **667** | HRVTPEVSGV | 62 | 1079.572 | 10 | 0.1 | 40 | Non-toxin | Probable allergen |
| **668** | EASLLAN | 62 | 716.3704 | 7 | -1 | 57.14 | Non-toxin | Probable non-allergen |
| **669** | FEANFTHNQKEF | 62 | 1511.668 | 12 | -0.9 | 33.33 | Non-toxin | Probable allergen |
| **670** | WLPFDALLL | 62 | 1086.611 | 9 | -1 | 88.89 | Non-toxin | Probable non-allergen |
| **671** | MPKALAPK | 62 | 854.5048 | 8 | 2 | 75 | Non-toxin | Probable non-allergen |
| **672** | MTAKPVML | 62 | 905.4714 | 8 | 1 | 75 | Non-toxin | Probable allergen |
| **673** | ANEQEVWS | 62 | 962.3981 | 8 | -2 | 37.5 | Non-toxin | Probable non-allergen |
| **674** | LKDDTGGLKY | 62 | 1108.576 | 10 | 0 | 20 | Non-toxin | Probable allergen |
| **675** | RTPPHHL | 62 | 856.4667 | 7 | 1.2 | 42.86 | Non-toxin | Probable non-allergen |
| **676** | ETGLNGPPE | 62 | 912.4188 | 9 | -2 | 33.33 | Non-toxin | Probable allergen |
| **677** | DHATAFVSNGGF | 62 | 1221.542 | 12 | -0.9 | 41.67 | Non-toxin | Probable non-allergen |
| **678** | LVGVPPF | 62 | 727.4268 | 7 | 0 | 85.71 | Non-toxin | Probable non-allergen |
| **679** | VASAAPLT | 62 | 728.4068 | 8 | 0 | 75 | Non-toxin | Probable non-allergen |
| **680** | GLPLPDVPF | 62 | 953.5222 | 9 | -1 | 77.78 | Non-toxin | Probable non-allergen |
| **681** | FVYMMPNSGLLA | 62 | 1341.646 | 12 | 0 | 66.67 | Non-toxin | Probable non-allergen |
| **682** | RAGFRL | 61 | 718.4238 | 6 | 2 | 50 | Non-toxin | Probable non-allergen |
| **683** | TTVLAPPALNVS | 61 | 1181.666 | 12 | 0 | 66.67 | Non-toxin | Probable non-allergen |
| **684** | LLLLTSVM | 61 | 904.5303 | 8 | 0 | 75 | Non-toxin | Probable non-allergen |
| **685** | LTGP | 61 | 386.2165 | 4 | 0 | 50 | Non-toxin | Probable non-allergen |
| **686** | TGKEPMPYAK | 61 | 1120.559 | 10 | 1 | 40 | Non-toxin | Probable allergen |
| **687** | YLVSSLVHFNAL | 61 | 1361.734 | 12 | 0.1 | 58.33 | Non-toxin | Probable non-allergen |
| **688** | FYPSLP | 61 | 722.3639 | 6 | 0 | 66.67 | Non-toxin | Prob no alg |
| **689** | LQQNVKNK | 61 | 971.54 | 8 | 2 | 25 | Non-toxin | Probable non-allergen |
| **690** | MELGTAPP | 61 | 830.3844 | 8 | -1 | 62.5 | Non-toxin | Probable non-allergen |
| **691** | FASSNKVLM | 61 | 1011.506 | 9 | 1 | 55.56 | Non-toxin | Probable allergen |
| **692** | LKNDNLLL | 61 | 941.5546 | 8 | 0 | 50 | Non-toxin | Probable allergen |
| **693** | MALSLGPPT | 61 | 901.4579 | 9 | 0 | 66.67 | Non-toxin | Probable non-allergen |
| **694** | YNGSAPPPTGF | 61 | 1107.487 | 11 | 0 | 45.45 | Non-toxin | Probable allergen |
| **695** | MVKDSVLGVT | 61 | 1063.558 | 10 | 0 | 50 | Non-toxin | Prob no lag |
| **696** | WLSLLEANSHK | 61 | 1296.683 | 11 | 0.1 | 45.45 | Non-toxin | Probable allergen |
| **697** | VVANA | 61 | 472.2645 | 5 | 0 | 80 | Non-toxin | Probable non-allergen |
| **698** | MKHML | 61 | 674.3244 | 5 | 1.1 | 60 | Non-toxin | Probable allergen |
| **699** | YAGKAGFAQQK | 61 | 1167.604 | 11 | 2 | 36.36 | Non-toxin | Probable allergen |
| **700** | VAHLDTVS | 61 | 840.4341 | 8 | -0.9 | 50 | Non-toxin | Probable allergen |
| **701** | LFSVTE | 61 | 694.3538 | 6 | -1 | 50 | Non-toxin | Probable allergen |
| **702** | SFNGGMHADLR | 61 | 1220.524 | 11 | 0.1 | 36.36 | Non-toxin | Probable non-allergen |
| **703** | RRLLVVK | 61 | 882.6127 | 7 | 3 | 57.14 | Non-toxin | Probable non-allergen |
| **704** | DLVVMDVLLV | 61 | 1114.631 | 10 | -2 | 80 | Non-toxin | Probable allergen |
| **705** | MEHCAKPTS | 61 | 1075.443 | 9 | 0 | 33.33 | Non-toxin | Probable non-allergen |
| **706** | DLCVLLPF | 61 | 975.5099 | 8 | -1.1 | 75 | Non-toxin | Probable non-allergen |
| **707** | FSSSVYK | 61 | 816.4017 | 7 | 1 | 28.75 | Non-toxin | Probable non-allergen |
| **708** | LMGVGFDAGTLFPN | 61 | 1437.696 | 14 | -1 | 57.14 | Non-toxin | Probable allergen |
| **709** | FLASGMVVK | 61 | 950.5259 | 9 | 1 | 66.67 | Non-toxin | Probable allergen |
| **710** | KAALMSF | 61 | 766.4047 | 7 | 1 | 71.43 | Non-toxin | Probable non-allergen |
| **711** | YNGLMM | 61 | 728.2874 | 6 | 0 | 50 | Non-toxin | Probable non-allergen |
| **712** | YFASPAAEAPTETV | 61 | 1452.677 | 14 | -2 | 57.14 | Non-toxin | Probable non-allergen |
| **713** | YVLANLDAGERQ | 60 | 1348.662 | 12 | -1 | 41.67 | Non-toxin | Probable non-allergen |
| **714** | RGQVPGVGQ | 60 | 896.4828 | 9 | 1 | 33.33 | Non-toxin | Probable allergen |
| **715** | MTVDYAKNEL | 60 | 1182.559 | 10 | -1 | 40 | Non-toxin | Probable non-allergen |
| **716** | MLRVALV | 60 | 800.4942 | 7 | 1 | 85.71 | Non-toxin | Probable non-allergen |
| **717** | MYSLGLP | 60 | 795.3837 | 7 | 0 | 57.14 | Non-toxin | Probable allergen |
| **718** | FLLPAD | 60 | 674.3639 | 6 | -1 | 83.33 | Non-toxin | Probable allergen |
| **719** | VLVSSDFLVSH | 60 | 1201.634 | 11 | -0.9 | 54.55 | Non-toxin | Probable allergen |
| **720** | NMKAEGPMTLLFGK | 60 | 1535.784 | 14 | 1 | 50 | Non-toxin | Probable non-allergen |
| **721** | LQVLKPML | 60 | 940.5779 | 8 | 1 | 75 | Non-toxin | Probable non-allergen |
| **722** | FLPSRRD | 60 | 889.477 | 7 | 1 | 42.86 | Non-toxin | Probable non-allergen |
| **723** | QLGEADMTTYV | 60 | 1226.549 | 11 | -2 | 36.36 | Non-toxin | Probable non-allergen |
| **724** | PELLKPPLR | 60 | 1061.66 | 9 | 1 | 66.67 | Non-toxin | Probable allergen |
| **725** | VAKGSSHK | 60 | 812.4504 | 8 | 2.1 | 25 | Non-toxin | Probable allergen |
| **726** | FPQYLAGLY | 60 | 1070.544 | 9 | 0 | 55.56 | Non-toxin | Probable allergen |
| **727** | WGLVMLSQQ | 60 | 1076.533 | 9 | 0 | 55.56 | Non-toxin | Probable allergen |
| **728** | RKPSNL | 60 | 713.4184 | 6 | 2 | 33.33 | Non-toxin | Probable non-allergen |
| **729** | FSVVGVPDKH | 60 | 1083.571 | 10 | 0.1 | 50 | Non-toxin | Probable non-allergen |
| **730** | KGGGFFAPN | 60 | 893.4395 | 9 | 1 | 44.44 | Non-toxin | Probable non-allergen |
| **731** | EDDSAAGLLDGLGVEE | 60 | 1588.71 | 16 | -6 | 37.5 | Non-toxin | Probable allergen |
| **732** | RGTPLSGAH | 60 | 894.4672 | 9 | 1.1 | 33.33 | Non-toxin | Probable non-allergen |
| **733** | ERPNAQGEQKQEQL | 60 | 1654.791 | 14 | -1 | 21.43 | Non-toxin | Probable allergen |
| **734** | VGAMGDSTL | 60 | 865.3851 | 9 | -1 | 44.44 | Non-toxin | Probable allergen |
| **735** | MVSDGVSLRQME | 60 | 1382.617 | 12 | -1 | 41.67 | Non-toxin | Probable non-allergen |
| **736** | ARTPNMLGVGPL | 60 | 1225.649 | 12 | 1 | 58.33 | Non-toxin | Probable allergen |
| **737** | VFNNDSGANEL | 60 | 1179.504 | 11 | -2 | 36.36 | Non-toxin | Probable non-allergen |
| **738** | GRDSPGKE | 60 | 844.4039 | 8 | 0 | 12.5 | Non-toxin | Probable allergen |
| **739** | VLGVEHADEVN | 60 | 1180.572 | 11 | -2.9 | 45.45 | Non-toxin | Probable allergen |
| **740** | LSLPGGYHPAAPK | 59 | 1306.703 | 13 | 1.1 | 53.85 | Non-toxin | Probable non-allergen |
| **741** | KPPLDFAADK | 59 | 1100.586 | 10 | 0 | 60 | Non-toxin | Probable non-allergen |
| **742** | REGGSANVGLR | 59 | 1114.584 | 11 | 1 | 27.27 | Non-toxin | Probable allergen |
| **743** | YTMALSLH | 59 | 934.4583 | 8 | 0.1 | 50 | Non-toxin | Probable allergen |
| **744** | LVAAG | 59 | 429.2587 | 5 | 0 | 80 | Non-toxin | Probable non-allergen |
| **745** | MGGPLGQGVLGTS | 59 | 1188.581 | 13 | 0 | 38.46 | Non-toxin | Probable non-allergen |
| **746** | YTGPAPNPSVV | 59 | 1100.55 | 11 | 0 | 54.55 | Non-toxin | Probable allergen |
| **747** | LPKKGR | 59 | 697.4598 | 6 | 3 | 33.33 | Non-toxin | Probable non-allergen |
| **748** | MNVRGM | 59 | 723.3044 | 6 | 1 | 50 | Non-toxin | Aleg prob |
| **749** | WPVANLDKGH | 59 | 1135.577 | 10 | 0.1 | 50 | Non-toxin | Probable non-allergen |
| **750** | MLKSKR | 59 | 761.98 | 6 | 3 | 33.33 | Non-toxin | Probable non-allergen |
| **751** | KLVVDMPPVLP | 59 | 1206.705 | 11 | 0 | 81.82 | Non-toxin | Probable allergen |
| **752** | RHKGTP | 59 | 694.3875 | 6 | 2.1 | 16.67 | Non-toxin | Probable non-allergen |
| **753** | VPSVGDDER | 59 | 972.4512 | 9 | -2 | 33.33 | Non-toxin | Probable allergen |
| **754** | FTGVGAESNFLH | 59 | 1278.588 | 12 | -0.9 | 41.67 | Non-toxin | Probable non-allergen |
| **755** | STDRHQQLEY | 59 | 1275.585 | 10 | -0.9 | 10 | Non-toxin | Probable allergen |
| **756** | FLKQMGTDSS | 59 | 1112.517 | 10 | 0 | 30 | Non-toxin | Probable non-allergen |
| **757** | MVPLKPV | 59 | 782.4724 | 7 | 1 | 85.71 | Non-toxin | Probable allergen |
| **758** | MPAELRGVAVL | 59 | 1154.648 | 11 | 0 | 72.73 | Non-toxin | Prob noalg |
| **759** | ENLNNPSRA | 59 | 1013.489 | 9 | 0 | 33.33 | Non-toxin | Probable allergen |
| **760** | RFGARL | 59 | 718.4238 | 6 | 2 | 50 | Non-toxin | Probable non-allergen |
| **761** | MGSSGFVGP | 59 | 837.3691 | 9 | 0 | 44.44 | Non-toxin | Probable non-allergen |
| **762** | MQRLNPGPTNNKNEKEFN | 59 | 2130.028 | 18 | 1 | 27.78 | Non-toxin | Probable non-allergen |
| **763** | VVAGAGGAESMF | 59 | 1094.507 | 12 | -1 | 58.33 | Non-toxin | Probable non-allergen |
| **764** | NKAPVAK | 59 | 726.4388 | 7 | 2 | 57.14 | Non-toxin | Probable non-allergen |
| **765** | EQEKGHPE | 59 | 952.425 | 8 | -1.9 | 12.5 | Non-toxin | Probable allergen |
| **766** | KGSTLAAAGNR | 59 | 1044.568 | 11 | 2 | 36.36 | Non-toxin | Probable non-allergen |
| **767** | NSHKLP | 59 | 694.3762 | 6 | 1.1 | 33.33 | Non-toxin | Probable allergen |
| **768** | LKANEDRGE | 59 | 1030.504 | 9 | -1 | 22.22 | Non-toxin | Probable non-allergen |
| **769** | HTGKAAYNAEA | 59 | 1131.531 | 11 | 0.1 | 36.36 | Non-toxin | Probable allergen |
| **770** | LTTPASNQAH | 59 | 1038.509 | 10 | 0.1 | 40 | Non-toxin | Probable allergen |
| **771** | FAPPPMPTNGHD | 59 | 1279.565 | 12 | -0.9 | 58.33 | Non-toxin | Probable non-allergen |
| **772** | LDDPALPNP | 59 | 950.4709 | 9 | -2 | 66.67 | Non-toxin | Probable non-allergen |
| **773** | DMPLKLVAPN | 59 | 1096.595 | 10 | 0 | 70 | Non-toxin | Probable allergen |
| **774** | FDAMGDALGY | 59 | 1074.433 | 10 | -2 | 50 | Non-toxin | Probable allergen |
| **775** | SMWEPPSAMLKS | 59 | 1362.631 | 12 | 0 | 58.33 | Non-toxin | Probable allergen |
| **776** | QRAPNADGQEKQKELQ | 59 | 1838.923 | 16 | 0 | 25 | Non-toxin | Probable non-allergen |
| **777** | YPGVGMVHSMGVVPK | 59 | 1556.784 | 15 | 1.1 | 53.33 | Non-toxin | Probable non-allergen |
| **778** | WVAVPVLVEGAELK | 58 | 1508.86 | 14 | -1 | 71.43 | Non-toxin | Probable non-allergen |
| **779** | RLLMSVLGGST | 58 | 1148.622 | 11 | 1 | 45.45 | Non-toxin | Probable allergen |
| **780** | WHPMAGK | 58 | 841.3905 | 7 | 1.1 | 57.14 | Non-toxin | Probable non-allergen |
| **781** | KHSPGAVM | 58 | 825.4167 | 8 | 1.1 | 50 | Non-toxin | Probable allergen |
| **782** | TTVPAEVPA | 58 | 883.4651 | 9 | -1 | 66.67 | Non-toxin | Probable non-allergen |
| **783** | MSKAKPGRSM | 58 | 1091.558 | 10 | 3 | 40 | Non-toxin | Probable allergen |
| **784** | FRTKKK | 58 | 806.5126 | 6 | 4 | 16.67 | Non-toxin | Probable non-allergen |
| **785** | DFASGSLAHMM | 58 | 1165.49 | 11 | -0.9 | 54.55 | Non-toxin | Probable non-allergen |
| **786** | MSLLGVM | 58 | 765.3765 | 7 | 0 | 71.43 | Non-toxin | Probable non-allergen |
| **787** | FASTYAGP | 58 | 812.3704 | 8 | 0 | 50 | Non-toxin | Probable allergen |
| **788** | NYGGMLMLM | 58 | 1076.434 | 9 | 0 | 55.56 | Non-toxin | Probable allergen |
| **789** | GSKGGLPLDPQPRP | 58 | 1417.768 | 14 | 1 | 42.86 | Non-toxin | Probable allergen |
| **790** | NTANQAPEER | 58 | 1128.516 | 10 | -1 | 30 | Non-toxin | Probable allergen |
| **791** | MVAGPTGGQ | 58 | 816.38 | 9 | 0 | 44.44 | Non-toxin | Probable non-allergen |
| **792** | EGAMDTPP | 58 | 816.3323 | 8 | -2 | 50 | Non-toxin | Probable non-allergen |
| **793** | CPEAFDAKDR | 58 | 1207.529 | 10 | -1.1 | 40 | Non-toxin | Probable non-allergen |
| **794** | RKKGHF | 58 | 771.4504 | 6 | 3.1 | 16.67 | Non-toxin | Probable non-allergen |
| **795** | RDNRNAQNLDGFCM | 58 | 1709.736 | 14 | -0.1 | 28.57 | Toxin | Probable non-allergen |
| **796** | YGVNSAKK | 58 | 866.4498 | 8 | 2 | 25 | Non-toxin | Probable non-allergen |
| **797** | DAGAFVAD | 58 | 764.334 | 8 | -2 | 62.5 | Non-toxin | Probable allergen |
| **798** | PNQHGRL | 58 | 821.4144 | 7 | 1.1 | 28.57 | Non-toxin | Probable non-allergen |
| **799** | LKGRGGV | 58 | 685.4235 | 7 | 2 | 28.57 | Non-toxin | Probable allergen |
| **800** | EVHTPSA | 58 | 739.35 | 7 | -0.9 | 42.86 | Non-toxin | Probable non-allergen |
| **801** | DLKGSAALLN | 58 | 1000.555 | 10 | 0 | 50 | Non-toxin | Probable allergen |
| **802** | LVAAAADVAVVPK | 58 | 1222.729 | 13 | 0 | 84.62 | Non-toxin | Probable non-allergen |
| **803** | MFTTGDVAQLHS | 58 | 1305.602 | 12 | -0.9 | 41.67 | Non-toxin | Probable allergen |
| **804** | FSSGAGTQ | 58 | 753.3293 | 8 | 0 | 25 | Non-toxin | Probable non-allergen |
| **805** | QNGAAVGPP | 58 | 809.4031 | 9 | 0 | 55.56 | Non-toxin | Probable allergen |
| **806** | KMVAPPAAVNK | 58 | 1124.638 | 11 | 2 | 72.73 | Non-toxin | Probable allergen |
| **807** | MQGVALSVGQ | 58 | 1004.496 | 10 | 0 | 50 | Non-toxin | Probable non-allergen |
| **808** | QPAVGDPHVTD | 58 | 1134.531 | 11 | -1.9 | 45.45 | Non-toxin | Probable non-allergen |
| **809** | HVLLADVGPF | 58 | 1066.581 | 10 | -0.9 | 70 | Non-toxin | Probable allergen |
| **810** | FVVPSSK | 57 | 762.4276 | 7 | 1 | 57.14 | Non-toxin | Probable non-allergen |
| **811** | AETGQLMH | 57 | 901.3964 | 8 | -0.9 | 37.5 | Non-toxin | Probable allergen |
| **812** | LLSHGAHTPEP | 57 | 1157.583 | 11 | -0.8 | 45.45 | Non-toxin | Probable non-allergen |
| **813** | HDVAVTNVTQY | 57 | 1245.599 | 11 | -0.9 | 36.36 | Non-toxin | Probable allergen |
| **814** | FAED | 57 | 480.1856 | 4 | -2 | 50 | Non-toxin | Probable non-allergen |
| **815** | MLKGVM | 57 | 677.3604 | 6 | 1 | 66.67 | Non-toxin | Probable non-allergen |
| **816** | EWMLVSDLKPYYS | 57 | 1645.77 | 13 | -1 | 46.15 | Non-toxin | Probable non-allergen |
| **817** | YVKKAAPAP | 57 | 943.5491 | 9 | 2 | 66.67 | Non-toxin | Probable non-allergen |
| **818** | EPPGSDLRAPK | 57 | 1165.609 | 11 | 0 | 45.45 | Non-toxin | Probable non-allergen |
| **819** | NNGALPQ | 57 | 712.3504 | 7 | 0 | 42.86 | Non-toxin | Probable non-allergen |
| **820** | EVAGAGEVVTR | 57 | 1086.567 | 11 | -1 | 45.45 | Non-toxin | Probable allergen |
| **821** | LLMHNPMTMM | 57 | 1217.543 | 10 | 0.1 | 70 | Non-toxin | Probable allergen |
| **822** | VPAVDGGVLH | 57 | 962.5185 | 10 | -0.9 | 60 | Non-toxin | Probable allergen |
| **823** | HTVLAYGPKF | 57 | 1131.608 | 10 | 1.1 | 50 | Non-toxin | Probable non-allergen |
| **824** | MATEQDVNNV | 57 | 1120.471 | 10 | -2 | 40 | Non-toxin | Probable allergen |
| **825** | NMGFAGNN | 57 | 839.3232 | 8 | 0 | 37.5 | Non-toxin | Probable non-allergen |
| **826** | WGMALAPSGAVK | 57 | 1186.617 | 12 | 1 | 66.67 | Non-toxin | Probable non-allergen |
| **827** | WQVLAQGHD | 57 | 1052.504 | 9 | -0.9 | 44.44 | Non-toxin | Probable non-allergen |
| **828** | QLDGGEDSDKH | 57 | 1199.505 | 11 | -2.9 | 9.09 | Non-toxin | Probable allergen |
| **829** | WAAMGVT | 57 | 750.3371 | 7 | 0 | 71.43 | Non-toxin | Alg prob |
| **830** | HPGGMAQAAH | 57 | 991.4294 | 10 | 0.2 | 50 | Non-toxin | Probable non-allergen |
| **831** | QNAAMNVMH | 57 | 1031.417 | 9 | 0.1 | 55.56 | Non-toxin | Probable allergen |
| **832** | MPLVNPAGGQTM | 57 | 1214.579 | 12 | 0 | 58.33 | Non-toxin | Probable non-allergen |
| **833** | NGGLAQT | 57 | 659.3239 | 7 | 0 | 28.57 | Non-toxin | Probable allergen |
| **834** | DVAGLANV | 57 | 758.381 | 8 | -1 | 62.5 | Non-toxin | Probable non-allergen |
| **835** | EALSNKAVHLLTE | 57 | 1423.767 | 13 | -0.9 | 46.15 | Non-toxin | Probable non-allergen |
| **836** | LLAPGTKQL | 57 | 939.5753 | 9 | 1 | 55.56 | Non-toxin | Probable allergen |
| **837** | FSVNNGV | 57 | 736.3392 | 7 | 0 | 42.86 | Non-toxin | Probable allergen |
| **838** | PSVLTVASE | 57 | 901.4756 | 9 | -1 | 55.56 | Non-toxin | Probable allergen |
| **839** | PMGASAGAAPGGFYT | 57 | 1353.602 | 15 | 0 | 53.33 | Non-toxin | Probable allergen |
| **840** | ARGPAEVPPRLQ | 57 | 1289.721 | 12 | 1 | 58.33 | Non-toxin | Probable non-allergen |
| **841** | RSAGMSPGAKN | 57 | 1074.524 | 11 | 2 | 36.36 | Non-toxin | Probable non-allergen |
| **842** | RMCSEQ | 57 | 809.316 | 6 | -0.1 | 16.67 | Non-toxin | Probable non-allergen |
| **843** | HLNPEDTS | 56 | 912.3825 | 8 | -1.9 | 25 | Non-toxin | Probable allergen |
| **844** | NSGSGQVVEKE | 56 | 1132.536 | 11 | -1 | 18.18 | Non-toxin | Probable allergen |
| **845** | ELVGPGAGAYY | 56 | 1095.524 | 11 | -1 | 45.45 | Non-toxin | Probable allergen |
| **846** | TLGYFGLP | 56 | 866.4538 | 8 | 0 | 50 | Non-toxin | Probable non-allergen |
| **847** | RLAPDFMFVEVNSH | 56 | 1660.803 | 14 | -0.9 | 57.14 | Non-toxin | Probable allergen |
| **848** | EPHGPLAVGEE | 56 | 1133.535 | 11 | -2.9 | 45.45 | Non-toxin | Probable allergen |
| **849** | EASL | 56 | 418.2064 | 4 | -1 | 57.14 | Non-toxin | Probable non-allergen |
| **850** | YGAGGNNPASNVMA | 56 | 1337.567 | 14 | 0 | 42.86 | Non-toxin | Probable non-allergen |
| **851** | PAQEYRN | 56 | 876.4089 | 7 | 0 | 28.57 | Non-toxin | Probable allergen |
| **852** | WGGSQSR | 56 | 776.3565 | 7 | 1 | 14.29 | Non-toxin | Probable non-allergen |
| **853** | DHMGVAPR | 56 | 881.4178 | 8 | 0.1 | 50 | Non-toxin | Probable allergen |
| **854** | KGALGVGDT | 56 | 816.4341 | 9 | 0 | 33.33 | Non-toxin | Probable allergen |
| **855** | MLAAMDKAGAGGELL | 56 | 1462.716 | 15 | -1 | 60 | Non-toxin | Probable allergen |
| **856** | AMELRPGGGGTYV | 56 | 1322.629 | 13 | 0 | 38.46 | Non-toxin | Probable allergen |
| **857** | TLVPGGDFTVSW | 56 | 1277.629 | 12 | -1 | 50 | Non-toxin | Probable allergen |
| **858** | LSPGAMNY | 56 | 851.3847 | 8 | 0 | 50 | Non-toxin | Probable allergen |
| **859** | HLMLHL | 56 | 762.4211 | 6 | 0.2 | 66.67 | Non-toxin | Probable allergen |
| **860** | KNLFFAAPV | 56 | 1005.565 | 9 | 1 | 77.78 | Non-toxin | Probable allergen |
| **861** | MQSTSNGVGELG | 56 | 1178.524 | 12 | -1 | 25 | Non-toxin | Probable allergen |
| **862** | MATGGGGPMKAR | 56 | 1132.548 | 12 | 2 | 41.67 | Non-toxin | Probable non-allergen |
| **863** | HPPTAPH | 56 | 755.3715 | 7 | 0.2 | 57.14 | Non-toxin | Probable non-allergen |
| **864** | WVVVLEAEGNLVTY | 56 | 1590.829 | 14 | -2 | 57.14 | Non-toxin | Probable non-allergen |
| **865** | VSTGANVGQ | 56 | 831.4086 | 9 | 0 | 33.33 | Non-toxin | Probable allergen |
| **866** | PLLAAMMDSGSTYV | 56 | 1454.679 | 14 | -1 | 57.14 | Non-toxin | Probable allergen |
| **867** | VTMLTPP | 56 | 757.4044 | 7 | 0 | 71.43 | Non-toxin | Probable non-allergen |
| **868** | EDSLAPLSK | 56 | 958.4971 | 9 | -1 | 44.44 | Non-toxin | Probable non-allergen |
| **869** | HPAATGTLMPH | 56 | 1131.55 | 11 | 0.2 | 54.55 | Non-toxin | Probable non-allergen |
| **870** | FVPGKVAGAVW | 56 | 1129.628 | 11 | 1 | 72.73 | Non-toxin | Probable non-allergen |
| **871** | KLVPYPDPMNH | 56 | 1309.649 | 11 | 0.1 | 54.55 | Non-toxin | Probable allergen |
| **872** | WRFMNPN | 56 | 979.4334 | 7 | 1 | 57.14 | Non-toxin | Probable non-allergen |
| **873** | KDAPAGAGH | 56 | 822.3984 | 9 | 0.1 | 44.44 | Non-toxin | Probable allergen |
| **874** | RKVNGVP | 56 | 768.4606 | 7 | 2 | 42.86 | Non-toxin | Probable non-allergen |
| **875** | EAPVGLGDSH | 55 | 980.4563 | 10 | -1.9 | 40 | Non-toxin | Probable non-allergen |
| **876** | QGGGGGVPLNP | 55 | 951.4774 | 11 | 0 | 36.36 | Non-toxin | Probable non-allergen |
| **877** | RLHSAAPLPL | 55 | 1073.635 | 10 | 1.1 | 70 | Non-toxin | Aleg prob |
| **878** | VLPPSSVL | 55 | 810.485 | 8 | 0 | 75 | Non-toxin | Probable allergen |
| **879** | LYLAMSLLLF | 55 | 1182.672 | 10 | 0 | 80 | Non-toxin | Probable non-allergen |
| **880** | VDGGSSRGSTR | 55 | 1077.516 | 11 | 1 | 9.09 | Non-toxin | Probable non-allergen |
| **881** | RSAVEGAH | 55 | 825.4093 | 8 | 0.1 | 37.5 | Non-toxin | Probable non-allergen |
| **882** | YDVANTGEQG | 55 | 1052.441 | 10 | -2 | 20 | Non-toxin | Probable non-allergen |
| **883** | MPPENHEWV | 55 | 1137.491 | 9 | -1.9 | 55.56 | Non-toxin | Probable non-allergen |
| **884** | SLPAPMLANSPP | 55 | 1193.611 | 12 | 0 | 75 | Non-toxin | Probable non-allergen |
| **885** | TLVPVPLAPPLP | 55 | 1212.748 | 12 | 0 | 91.67 | Non-toxin | Probable non-allergen |
| **886** | TTMSNLLGSM | 55 | 1069.479 | 10 | 0 | 40 | Non-toxin | Probable non-allergen |
| **887** | RGLNAPKVANA | 55 | 1109.631 | 11 | 2 | 54.55 | Non-toxin | Probable non-allergen |
| **888** | NPGGVGGVGH | 55 | 849.4093 | 10 | 0.1 | 30 | Non-toxin | Probable non-allergen |
| **889** | LRREF | 55 | 719.4078 | 5 | 1 | 40 | Non-toxin | Probable non-allergen |
| **890** | AMLLGLF | 55 | 763.4302 | 7 | 0 | 85.71 | Non-toxin | Probable non-allergen |
| **891** | ALSLATTTHPRPN | 55 | 1377.736 | 13 | 1.1 | 46.15 | Non-toxin | Probable allergen |
| **892** | NPGAKGH | 55 | 679.3401 | 7 | 1.1 | 28.57 | Non-toxin | Probable non-allergen |
| **893** | EGAFVMGV | 55 | 808.3789 | 8 | -1 | 62.5 | Non-toxin | Probable allergen |
| **894** | RPGDAGAAH | 55 | 850.4045 | 9 | 0.1 | 44.44 | Non-toxin | Probable allergen |
| **895** | RSFSFFGGESK | 55 | 1247.594 | 11 | 1 | 27.27 | Non-toxin | Probable non-allergen |
| **896** | EETAAGADMVSEQH | 55 | 1489.599 | 14 | -3.9 | 35.71 | Non-toxin | Probable allergen |
| **897** | RLTNVENQQAHPH | 55 | 1542.765 | 13 | 0.2 | 30.77 | Non-toxin | Probable allergen |
| **898** | VHAGATPANK | 55 | 964.509 | 10 | 1.1 | 50 | Non-toxin | Probable allergen |
| **899** | QSTLGGALVGEK | 55 | 1158.625 | 12 | 0 | 33.33 | Non-toxin | Probable non-allergen |
| **900** | FASGLDLTK | 55 | 950.5073 | 9 | 0 | 44.44 | Non-toxin | Probable non-allergen |
| **901** | KAPAHGDQ | 55 | 822.3984 | 8 | 0.1 | 37.5 | Non-toxin | Prob noalg |
| **902** | HPPSQGVSF | 55 | 954.4559 | 9 | 0.1 | 44.44 | Non-toxin | Probable allergen |
| **903** | LKRGGEH | 55 | 795.4351 | 7 | 1.1 | 14.29 | Non-toxin | Probable allergen |
| **904** | KCAPPPDHLVAQAQ | 55 | 1530.761 | 14 | 0 | 57.14 | Non-toxin | Probable non-allergen |
| **905** | WVFYVLVSLGL | 55 | 1294.732 | 11 | 0 | 72.73 | Non-toxin | Probable non-allergen |
| **906** | LTATHGNTAFK | 55 | 1159.599 | 11 | 1.1 | 36.36 | Non-toxin | Probable allergen |
| **907** | HLTMNGV | 55 | 770.3745 | 7 | 0.1 | 42.86 | Non-toxin | Probable allergen |
| **908** | MLSEGKSEPLE | 55 | 1218.58 | 11 | -2 | 36.36 | Non-toxin | Probable non-allergen |
| **909** | DDGKGSDELAGGTQ | 54 | 1348.574 | 14 | -3 | 14.29 | Non-toxin | Probable allergen |
| **910** | DPHLANSGSGN | 54 | 1067.463 | 11 | -0.9 | 27.27 | Non-toxin | Probable non-allergen |
| **911** | RGFPLPDVGL | 54 | 1069.592 | 10 | 0 | 60 | Non-toxin | Probable allergen |
| **912** | WPAPAVAPYF | 54 | 1117.56 | 10 | 0 | 90 | Non-toxin | Probable non-allergen |
| **913** | WAQMTKSNHM | 54 | 1232.543 | 10 | 1.1 | 40 | Non-toxin | Probable non-allergen |
| **914** | NATPAGVH | 54 | 765.377 | 8 | 0.1 | 50 | Non-toxin | Probable non-allergen |
| **915** | LDGTVQAR | 54 | 858.4559 | 8 | 0 | 37.5 | Non-toxin | Probable non-allergen |
| **916** | EATGHDMVM | 54 | 989.3947 | 9 | -1.9 | 44.44 | Non-toxin | Probable allergen |
| **917** | WHAGRGAPSHGAGGMTQNH | 54 | 1927.861 | 19 | 1.3 | 31.58 | Non-toxin | Probable non-allergen |
| **918** | VLGGDSHSNDANKQ | 54 | 1440.659 | 14 | -0.9 | 21.43 | Non-toxin | Probable allergen |
| **919** | KTSMLSAKPCGNS | 54 | 1395.649 | 13 | 1.9 | 30.77 | Non-toxin | Probable allergen |
| **920** | QTGTAGGAMGQ | 54 | 977.4236 | 11 | 0 | 27.27 | Non-toxin | Probable allergen |
| **921** | LTTQGLM | 54 | 762.3946 | 7 | 0 | 42.86 | Non-toxin | Probable non-allergen |
| **922** | HALAMGSV | 54 | 784.3901 | 8 | 0.1 | 62.5 | Non-toxin | Probable non-allergen |
| **923** | TLVSMDTSGGP | 54 | 1063.486 | 11 | -1 | 36.36 | Non-toxin | Probable non-allergen |
| **924** | RGSRDLPL | 54 | 912.5141 | 8 | 1 | 37.5 | Non-toxin | Probable allergen |
| **925** | MVTSTGFAK | 54 | 956.4637 | 9 | 1 | 44.44 | Non-toxin | Probable allergen |
| **926** | LPVGSHALTY | 54 | 1056.56 | 10 | 0.1 | 50 | Non-toxin | Probable allergen |
| **927** | HNVMFGLF | 54 | 963.4636 | 8 | 0.1 | 62.5 | Non-toxin | Probable allergen |
| **928** | HEGGAFGGFYR | 54 | 1196.536 | 11 | 0.1 | 27.27 | Non-toxin | Probable allergen |
| **929** | AEGSPPMVHH | 54 | 1076.471 | 10 | -0.8 | 50 | Non-toxin | Probable non-allergen |
| **930** | FLGYFAMN | 54 | 961.4368 | 8 | 0 | 62.5 | Non-toxin | Probable non-allergen |
| **931** | HLPAVGF | 54 | 739.4017 | 7 | 0.1 | 71.43 | Non-toxin | Probable non-allergen |
| **932** | ELD | 54 | 375.1642 | 3 | -2 | 33.33 | Non-toxin | Probable allergen |
| **933** | FPGPLVAGGKW | 54 | 1127.613 | 11 | 1 | 63.64 | Non-toxin | Probable non-allergen |
| **934** | SQAGFNTTR | 54 | 980.4675 | 9 | 1 | 22.22 | Non-toxin | Probable non-allergen |
| **935** | VVGPVMSVV | 54 | 901.4943 | 9 | 0 | 77.78 | Non-toxin | Probable allergen |
| **936** | LLAAGETPSGGH | 54 | 1108.551 | 12 | -0.9 | 41.67 | Non-toxin | Probable allergen |
| **937** | YDVVGGGLVASEQP | 54 | 1389.678 | 14 | -2 | 42.86 | Non-toxin | Probable non-allergen |
| **938** | RPYGGGR | 54 | 761.3932 | 7 | 2 | 14.29 | Non-toxin | Probable non-allergen |
| **939** | KKYRVF | 53 | 839.5017 | 6 | 3 | 33.33 | Non-toxin | Probable non-allergen |
| **940** | TTAKGPV | 53 | 672.3806 | 7 | 1 | 42.86 | Non-toxin | Probable non-allergen |
| **941** | MGGASAKGE | 53 | 806.3593 | 9 | 0 | 33.33 | Non-toxin | Probable allergen |
| **942** | VLSNGNS | 53 | 689.3344 | 7 | 0 | 28.57 | Non-toxin | Probable non-allergen |
| **943** | RHNNPALQP | 53 | 1046.526 | 9 | 1.1 | 44.44 | Non-toxin | Probable non-allergen |
| **944** | HNSQNNLL | 53 | 938.457 | 8 | 0.1 | 25 | Non-toxin | Probable allergen |
| **945** | MMPANTTSKGDMF | 53 | 1445.599 | 13 | 0 | 46.15 | Non-toxin | Probable allergen |
| **946** | FAAVVPGNK | 53 | 901.5021 | 9 | 1 | 66.67 | Non-toxin | Probable non-allergen |
| **947** | LPRH | 53 | 521.3074 | 4 | 1.1 | 50 | Non-toxin | Probable allergen |
| **948** | FLVG | 53 | 434.2529 | 4 | 0 | 75 | Non-toxin | Probable non-allergen |
| **949** | LLATGTMVVPL | 53 | 1113.647 | 11 | 0 | 72.73 | Non-toxin | Probable allergen |
| **950** | NNGSASDHAPHW | 53 | 1291.533 | 12 | -0.8 | 33.33 | Non-toxin | Probable allergen |
| **951** | SEHEKATVAFGGPVH | 53 | 1564.763 | 15 | -0.8 | 40 | Non-toxin | Probable non-allergen |
| **952** | LSETGKESEVTAGHSR | 53 | 1686.817 | 16 | -0.9 | 18.75 | Non-toxin | Probable allergen |
| **953** | FSTD | 53 | 468.1856 | 4 | -1 | 25 | Non-toxin | Probable non-allergen |
| **954** | FVNHDSLRGH | 53 | 1180.574 | 10 | 0.2 | 30 | Non-toxin | Probable allergen |
| **955** | KSGGDVP | 53 | 658.3286 | 7 | 0 | 28.57 | Non-toxin | Probable allergen |
| **956** | LLGGVSYASKF | 53 | 1140.618 | 11 | 1 | 45.45 | Non-toxin | Probable allergen |
| **957** | RLAMGPVEAL | 53 | 1055.58 | 10 | 0 | 70 | Non-toxin | Probable non-allergen |
| **958** | EKNVEPGSDPAGTSHR | 53 | 1679.786 | 16 | -0.9 | 25 | Non-toxin | Probable non-allergen |
| **959** | TQTAMPAASST | 53 | 1064.481 | 11 | 0 | 45.45 | Non-toxin | Probable allergen |
| **960** | HPPGKK | 53 | 662.3864 | 6 | 2.1 | 33.33 | Non-toxin | Probable allergen |
| **961** | KPPDMSSL | 53 | 873.4266 | 8 | 0 | 50 | Non-toxin | Probable allergen |
| **962** | RSLAAAMDLGARW | 53 | 1432.724 | 13 | 1 | 61.54 | Non-toxin | Probable allergen |
| **963** | LSPAVGPP | 52 | 736.4119 | 8 | 0 | 75 | Non-toxin | Probable non-allergen |
| **964** | RLKGGAEDEGR | 52 | 1186.606 | 11 | 0 | 18.18 | Non-toxin | Probable allergen |
| **965** | EAVGVHVAPLGH | 52 | 1184.63 | 12 | -0.8 | 58.33 | Non-toxin | Probable allergen |
| **966** | LMGNGSLLLPAPVV | 52 | 1379.785 | 14 | 0 | 71.43 | Non-toxin | Probable non-allergen |
| **967** | RSSADVV | 52 | 732.3766 | 7 | 0 | 42.86 | Non-toxin | Probable non-allergen |
| **968** | RTEVEGAAELR | 52 | 1229.637 | 11 | -1 | 36.36 | Non-toxin | Probable allergen |
| **969** | TRGPKAT | 52 | 729.4133 | 7 | 2 | 28.57 | Non-toxin | Probable allergen |
| **970** | WNGSGGGLGLLLY | 52 | 1306.656 | 13 | 0 | 38.46 | Non-toxin | Probable allergen |
| **971** | KPAPARF | 52 | 785.4548 | 7 | 2 | 71.43 | Non-toxin | Probable non-allergen |
| **972** | YLAVGSMFNVSQE | 52 | 1443.67 | 13 | -1 | 46.15 | Non-toxin | Probable allergen |
| **973** | RWGAHADTYAQLHGSYN | 52 | 1945.882 | 17 | 0.2 | 29.41 | Non-toxin | Probable allergen |
| **974** | PDMGPKTKGKNH | 52 | 1308.661 | 12 | 2.1 | 25 | Non-toxin | Probable non-allergen |
| **975** | RKGVPPT | 52 | 753.4497 | 7 | 2 | 42.86 | Non-toxin | Probable non-allergen |
| **976** | HMNSGGPKGTLMPNS | 52 | 1542.692 | 15 | 1.1 | 33.33 | Non-toxin | Probable allergen |
| **977** | HTLAVKGFNPAPF | 52 | 1397.746 | 13 | 1.1 | 61.54 | Non-toxin | Probable allergen |
| **978** | HRSDAAFTMV | 52 | 1133.529 | 10 | 0.1 | 50 | Non-toxin | Probable non-allergen |
| **979** | WGPTDNGNQQ | 52 | 1115.463 | 10 | -1 | 20 | Non-toxin | Probable allergen |
| **980** | FQSPATDAKW | 52 | 1149.545 | 10 | 0 | 50 | Non-toxin | Probable allergen |
| **981** | LFLDVHNRPH | 52 | 1246.657 | 10 | 0.2 | 50 | Non-toxin | Probable non-allergen |
| **982** | FSKAKYGSSR | 52 | 1129.588 | 10 | 3 | 20 | Non-toxin | Probable allergen |
| **983** | VFGGGGTADFVTYHP | 52 | 1523.704 | 15 | -0.9 | 40 | Non-toxin | Probable non-allergen |
| **984** | TTTGNFVYALR | 52 | 1241.64 | 11 | 1 | 36.36 | Non-toxin | Probable non-allergen |
| **985** | EANLHQF | 52 | 857.4031 | 7 | -0.9 | 42.86 | Non-toxin | Probable allergen |
| **986** | SMKAGHVAKF | 52 | 1074.565 | 10 | 2.1 | 50 | Non-toxin | Probable non-allergen |
| **987** | TTGT | 52 | 378.1751 | 4 | 0 | 0 | Non-toxin | Probable non-allergen |
| **988** | FMNFARDFDM | 52 | 1308.527 | 10 | -1 | 60 | Non-toxin | Probable non-allergen |
| **989** | VNPLGSTGDSNLY | 52 | 1335.631 | 13 | -1 | 30.77 | Non-toxin | Probable non-allergen |
| **990** | LLVSAGLYVFKV | 52 | 1307.785 | 12 | 1 | 66.67 | Non-toxin | Probable non-allergen |
| **991** | RSVGFLGGPFG | 52 | 1092.572 | 11 | 1 | 45.45 | Non-toxin | Probable non-allergen |
| **992** | YVAPAMNSQGDMF | 52 | 1429.601 | 13 | -1 | 53.85 | Non-toxin | Probable non-allergen |
| **993** | DEGSGPPAAGNW | 52 | 1156.479 | 12 | -2 | 41.67 | Non-toxin | Probable allergen |
| **994** | ASGSVRP | 52 | 672.3555 | 7 | 1 | 42.86 | Non-toxin | Probable allergen |
| **995** | SRYLLL | 52 | 763.4592 | 6 | 1 | 50 | Non-toxin | Probable allergen |
| **996** | AQAPTVLF | 52 | 845.4647 | 8 | 0 | 75 | Non-toxin | Probable non-allergen |
| **997** | WGNGTSKN | 52 | 862.3933 | 8 | 1 | 12.5 | Non-toxin | Probable non-allergen |
| **998** | KFATHVHGQGS | 52 | 1167.578 | 11 | 1.2 | 27.27 | Non-toxin | Probable allergen |
| **999** | DAGGLGTH | 52 | 726.3297 | 8 | -0.9 | 25 | Non-toxin | Probable non-allergen |
| **1000** | YFVMFNMFFFPN | 52 | 1602.704 | 12 | 0 | 75 | Non-toxin | Probable non-allergen |
| **1001** | VGGSGANSH | 52 | 784.3464 | 9 | 0.1 | 22.22 | Non-toxin | Probable non-allergen |
| **1002** | KPAAGGGET | 52 | 786.3871 | 9 | 0 | 33.33 | Non-toxin | Probable allergen |
| **1003** | MRNNMAG | 52 | 793.3211 | 7 | 1 | 42.86 | Non-toxin | Probable allergen |
| **1004** | ESATHQERHN | 52 | 1207.533 | 10 | -0.8 | 10 | Non-toxin | Probable non-allergen |
| **1005** | FHNMDADRHM | 51 | 1288.508 | 10 | -0.8 | 40 | Non-toxin | Probable non-allergen |
| **1006** | LRGMAANAPLPGLF | 51 | 1426.775 | 14 | 1 | 71.43 | Non-toxin | Probable non-allergen |
| **1007** | TVGLPGAKST | 51 | 929.5182 | 10 | 1 | 40 | Non-toxin | Probable allergen |
| **1008** | RPGGNRSL | 51 | 855.4675 | 8 | 2 | 25 | Non-toxin | Probable non-allergen |
| **1009** | MVNTDSWLT | 51 | 1081.4751 | 9 | -1 | 44.44 | Non-toxin | Probable allergen |
| **1010** | RLKGVSANEPVTLK | 51 | 1511.8672 | 14 | 2 | 42.86 | Non-toxin | Probable non-allergen |
| **1011** | FDPGEDGER | 51 | 1020.4148 | 9 | -3 | 22.22 | Non-toxin | Probable non-allergen |
| **1012** | NTAKYD | 51 | 710.3235 | 6 | 0 | 16.67 | Non-toxin | Probable allergen |
| **1013** | MNRDAM | 51 | 736.2996 | 6 | 0 | 50 | Non-toxin | Probable allergen |
| **1014** | KHAKGEGWP | 51 | 1008.514 | 9 | 1.1 | 33.33 | Toxin | Probable allergen |
| **1015** | NKGAGAGV | 51 | 672.3555 | 8 | 1 | 37.5 | Non-toxin | Probable non-allergen |
| **1016** | HAVAPGGT | 51 | 708.3555 | 8 | 0.1 | 50 | Non-toxin | Probable non-allergen |
| **1017** | LVVVHYAPTP | 51 | 1094.612 | 10 | 0.1 | 70 | Non-toxin | Probable non-allergen |
| **1018** | QPAVLHQ | 51 | 791.429 | 7 | 0.1 | 57.14 | Non-toxin | Probable non-allergen |
| **1019** | WTSEPPAFAMAV | 51 | 1305.606 | 12 | -1 | 75 | Non-toxin | Probable allergen |
| **1020** | YGDRLAT | 51 | 794.3923 | 7 | 0 | 28.57 | Non-toxin | Probable allergen |
| **1021** | LEPLVAL | 51 | 753.4636 | 7 | -1 | 85.71 | Non-toxin | Probable non-allergen |
| **1022** | WLSAAFDFVLRRT | 51 | 1580.846 | 13 | 1 | 61.54 | Non-toxin | Probable non-allergen |
| **1023** | PWSELFDSVVQNV | 51 | 1518.735 | 13 | -2 | 53.85 | Non-toxin | Probable allergen |
| **1024** | KFGGVGKPPAPATK | 51 | 1353.777 | 14 | 3 | 50 | Non-toxin | Probable allergen |
| **1025** | EGGATSTEEEVVK | 51 | 1334.62 | 13 | -3 | 23.08 | Non-toxin | Probable allergen |
| **1026** | WGPLHGGRW | 51 | 1064.531 | 9 | 1.1 | 44.44 | Non-toxin | Probable non-allergen |
| **1027** | NFNAGYLGEVHLLL | 51 | 1558.815 | 14 | -0.9 | 50 | Non-toxin | Probable allergen |
| **1028** | SHVTASSGSGLHAQ | 51 | 1337.632 | 14 | 0.2 | 28.57 | Non-toxin | Probable allergen |
| **1029** | AEAGAGDETVSH | 51 | 1142.484 | 12 | -2.9 | 33.33 | Non-toxin | Probable allergen |
| **1030** | HVPGSNMNGGHAGPE | 51 | 1475.621 | 15 | -0.8 | 33.33 | Non-toxin | Probable non-allergen |
| **1031** | FGPSGMAALSSE | 51 | 1152.512 | 12 | -1 | 50 | Non-toxin | Probable allergen |
| **1032** | LDAGAASLRQS | 51 | 1087.562 | 11 | 0 | 45.45 | Non-toxin | Probable non-allergen |
| **1033** | EGGASPPN | 51 | 727.3137 | 8 | -1 | 37.5 | Non-toxin | Probable allergen |
| **1034** | NNGGLAGP | 51 | 698.3347 | 8 | 0 | 37.5 | Non-toxin | Probable allergen |
| **1035** | QPEGGGPFLNH | 51 | 1151.536 | 11 | -0.9 | 36.36 | Non-toxin | Probable allergen |
| **1036** | YPGPLANVPVL | 51 | 1138.639 | 11 | 0 | 72.73 | Non-toxin | Probable non-allergen |
| **1037** | MASKVPLRT | 51 | 1017.564 | 9 | 2 | 55.56 | Non-toxin | Probable allergen |
| **1038** | MLKGGAMEGTLAEA | 51 | 1377.663 | 14 | -1 | 50 | Non-toxin | Probable allergen |
| **1039** | DLGRSADNPPR | 51 | 1197.574 | 11 | 0 | 36.36 | Non-toxin | Probable non-allergen |
| **1040** | TPAAAHAWGQ | 50 | 1008.478 | 10 | 0.1 | 60 | Non-toxin | Probable non-allergen |
| **1041** | KPNSAARLY | 50 | 1018.556 | 9 | 2 | 44.44 | Non-toxin | Probable non-allergen |
| **1042** | KGPFPAL | 50 | 728.4221 | 7 | 1 | 71.43 | Non-toxin | Probable non-allergen |
| **1043** | LLLCEAEEPGPQKQKDMF | 50 | 2148.023 | 18 | -2.1 | 44.44 | Non-toxin | Probable non-allergen |
| **1044** | ELARNGYAAGDAAQL | 50 | 1518.743 | 15 | -1 | 46.67 | Non-toxin | Probable non-allergen |
| **1045** | RLSSANTGPQ | 50 | 1029.52 | 10 | 1 | 30 | Non-toxin | Probable allergen |
| **1046** | LVGPWAERGL | 50 | 1096.603 | 10 | 0 | 60 | Non-toxin | Probable allergen |
| **1047** | FLAMGAAP | 50 | 776.3891 | 8 | 0 | 87.5 | Non-toxin | Probable allergen |
| **1048** | WGGSGAAMEGPR | 50 | 1174.519 | 12 | 0 | 41.67 | Non-toxin | Probable non-allergen |
| **1049** | FALVLDLALL | 50 | 1086.669 | 10 | -1 | 90 | Non-toxin | Probable non-allergen |
| **1050** | NPPLNFASNV | 50 | 1072.519 | 10 | 0 | 60 | Non-toxin | Probable non-allergen |
| **1051** | WGGGLGAHVRD | 50 | 1123.552 | 11 | 0.1 | 36.36 | Non-toxin | Probable non-allergen |
| **1052** | EVPLVGVANA | 50 | 967.5338 | 10 | -1 | 70 | Non-toxin | Probable allergen |
| **1053** | MAHAVHR | 50 | 820.4126 | 7 | 1.2 | 57.14 | Non-toxin | Probable allergen |
| **1054** | HPGVVQLE | 50 | 877.4658 | 8 | -0.9 | 50 | Non-toxin | Probable non-allergen |
| **1055** | RAASRGAPF | 50 | 931.4987 | 9 | 2 | 55.56 | Non-toxin | Probable allergen |
| **1056** | YVHDTDMARPTR | 50 | 1460.683 | 12 | 0.1 | 33.33 | Non-toxin | Probable non-allergen |
| **1057** | MMVVEDTCALLK | 50 | 1408.677 | 12 | -1.1 | 58.33 | Non-toxin | Probable allergen |
| **1058** | GMKTMTLK | 50 | 908.4824 | 8 | 2 | 37.5 | Non-toxin | Probable allergen |
| **1059** | FGSAADNCLGS | 50 | 1097.445 | 11 | -1.1 | 36.36 | Non-toxin | Probable allergen |
| **1060** | WMTAHLTFDLLPR | 50 | 1599.823 | 13 | 0.1 | 61.54 | Non-toxin | Probable allergen |
| **1061** | LESMALFFLVST | 50 | 1356.7 | 12 | -1 | 66.67 | Non-toxin | Probable non-allergen |
| **1062** | TMAHAPAATR | 50 | 1025.508 | 10 | 1.1 | 60 | Non-toxin | Probable non-allergen |
| **1063** | EVNAAKDEPPR | 50 | 1224.61 | 11 | -1 | 45.45 | Non-toxin | Probable allergen |
| **1064** | EENALTHDSLGFEK | 50 | 1588.737 | 14 | -2.9 | 28.57 | Non-toxin | Probable non-allergen |
| **1065** | LTSEGPEVPM | 50 | 1074.49 | 10 | -2 | 50 | Non-toxin | Probable allergen |
| **1066** | MGTHAGLNENYGS | 50 | 1365.562 | 13 | -0.9 | 23.08 | Non-toxin | Probable allergen |
| **1067** | NTVEGGEKVNNLYS | 50 | 1523.71 | 14 | -1 | 21.43 | Non-toxin | Probable allergen |

# **Table 3.** Rank of peptides resulting from the multicriteria decision analysis (MCDA).

| **Rank number** | **Value** | **Peptide** |
| --- | --- | --- |
| **1** | 0.881407 | KLKKNL |
| **1** | 0.881407 | MLKSKR |
| **1** | 0.881407 | KKYRVF |
| **4** | 0.879513 | FRTKKK |
| **5** | 0.867586 | SVVAKAPVGKR |
| **6** | 0.862603 | MKKLPSRP |
| **7** | 0.849632 | MSKAKPGRSM |
| **8** | 0.841623 | LPKKGR |
| **8** | 0.841623 | RKKGHF |
| **10** | 0.833525 | KFGGVGKPPAPATK |
| **11** | 0.822679 | FSKAKYGSSR |
| **12** | 0.805186 | RGFVVK |
| **12** | 0.805186 | LFKLRT |
| **14** | 0.802833 | MAVVAPKKV |
| **14** | 0.802833 | HPVMNVLKK |
| **16** | 0.802217 | YMKKAMM |
| **16** | 0.802217 | WLAKSVK |
| **16** | 0.802217 | MRVKGSL |
| **19** | 0.8 | MLKQR |
| **19** | 0.8 | RVNKF |
| **19** | 0.8 | RKLHF |
| **19** | 0.8 | LFGPVGPRVK |
| **19** | 0.8 | NKVTKFVLPP |
| **24** | 0.798222 | RKSSMVPL |
| **24** | 0.798222 | GMKTMTLK |
| **27** | 0.796215 | RLVAHSSVVKG |
| **28** | 0.792797 | VLKHSR |
| **28** | 0.792797 | LLPAKR |
| **28** | 0.792797 | KLN(+.98)RLY |
| **28** | 0.792797 | KLALRP |
| **28** | 0.792797 | RLKPFP |
| **28** | 0.792797 | VSGPAVVKR |
| **28** | 0.792797 | LLRAPK |
| **28** | 0.792797 | RAGFRL |
| **28** | 0.792797 | RFGARL |
| **28** | 0.792797 | MASKVPLRT |
| **38** | 0.788925 | SMKAGHVAKF |
| **39** | 0.787542 | LKRALPP |
| **39** | 0.787542 | ARLKPPF |
| **39** | 0.787542 | KLKQVDK |
| **39** | 0.787542 | YVVRGGK |
| **39** | 0.787542 | MKKLNGY |
| **39** | 0.787542 | LKGRGGV |
| **39** | 0.787542 | RKVNGVP |
| **39** | 0.787542 | RLKGVSANEPVTLK |
| **47** | 0.784645 | LVTGGSPGMRK |
| **47** | 0.784645 | AVPVGTAGLNKSKGM |
| **47** | 0.784645 | KMVAPPAAVNK |
| **50** | 0.781585 | VLTGNGSGLARR |
| **50** | 0.781585 | KSVALNNK |
| **50** | 0.781585 | RVSLNPPK |
| **50** | 0.781585 | FVKGTGPR |
| **50** | 0.781585 | MPKALAPK |
| **50** | 0.781585 | LQQNVKNK |
| **56** | 0.779999 | CRFFKMYHNGLRD |
| **57** | 0.778378 | DRKVLHSHSTLNR |
| **58** | 0.776722 | TVPVRSNNK |
| **59** | 0.773317 | MPYNPKAGLR |
| **59** | 0.773317 | YACLKVK |
| **59** | 0.773317 | RNMMQGSPRN |
| **62** | 0.769797 | RCLAVNGGR |
| **62** | 0.769797 | TTVTAKKLYSH |
| **62** | 0.769797 | HPKFGAKGGSM |
| **62** | 0.769797 | RGLNAPKVANA |
| **66** | 0.767998 | RAALPR |
| **66** | 0.767998 | RALKPP |
| **66** | 0.767998 | FRAKTQ |
| **66** | 0.767998 | KLGSHR |
| **66** | 0.767998 | MGNRHK |
| **66** | 0.767998 | RTNPVR |
| **66** | 0.767998 | KPAMPK |
| **66** | 0.767998 | RRPGLT |
| **66** | 0.767998 | KARHSL |
| **66** | 0.767998 | RQKGGM |
| **66** | 0.767998 | RKPSNL |
| **66** | 0.767998 | MATGGGGPMKAR |
| **78** | 0.762462 | LAGKPGR |
| **78** | 0.762462 | GRPNKLY |
| **78** | 0.762462 | NKAPVAK |
| **78** | 0.762462 | KTSMLSAKPCGNS |
| **78** | 0.762462 | KPAPARF |
| **78** | 0.762462 | RKGVPPT |
| **84** | 0.760576 | KPTSVAPK |
| **84** | 0.760576 | KGPTSSKF |
| **84** | 0.760576 | VAKGSSHK |
| **84** | 0.760576 | YGVNSAKK |
| **84** | 0.760576 | RPGGNRSL |
| **89** | 0.756751 | YVKKAAPAP |
| **89** | 0.756751 | KPNSAARLY |
| **89** | 0.756751 | RAASRGAPF |
| **93** | 0.754815 | MTAGRPGSGK |
| **94** | 0.752865 | YAGKAGFAQQK |
| **94** | 0.752865 | KGSTLAAAGNR |
| **94** | 0.752865 | RSAGMSPGAKN |
| **97** | 0.750901 | PDMGPKTKGKNH |
| **98** | 0.734878 | RSYPSPR |
| **98** | 0.734878 | NNYNPKAGR |
| **98** | 0.734878 | ARYDAGRP |
| **98** | 0.734878 | APSSRGKN |
| **98** | 0.734878 | HSNKNPRS |
| **98** | 0.734878 | RGGTAKSH |
| **98** | 0.734878 | RTAGASPTATR |
| **98** | 0.734878 | RKPAPP |
| **98** | 0.734878 | RHKGTP |
| **98** | 0.734878 | RPYGGGR |
| **98** | 0.734878 | HPPGKK |
| **98** | 0.734878 | TRGPKAT |
| **110** | 0.708815 | LKVLQPPF |
| **110** | 0.708815 | LKYHVLAL |
| **110** | 0.708815 | MLVARP |
| **110** | 0.708815 | FLPGRW |
| **110** | 0.708815 | RFMVPLEK |
| **110** | 0.708815 | LKLHPM |
| **110** | 0.708815 | VFRAAL |
| **110** | 0.708815 | HLLFAK |
| **110** | 0.708815 | VKTWAKVELV |
| **110** | 0.708815 | VLKSLLSP |
| **110** | 0.708815 | LAFGRV |
| **110** | 0.708815 | EPLLKPLM |
| **110** | 0.708815 | FRAFPL |
| **110** | 0.708815 | KTSNLLMVVTPL |
| **110** | 0.708815 | MTAKPVML |
| **110** | 0.708815 | MNVRGM |
| **110** | 0.708815 | SRYLLL |
| **127** | 0.7072 | WLSAAFDFVLRRT |
| **128** | 0.706711 | RLLMSVLGGST |
| **128** | 0.706711 | FVPGKVAGAVW |
| **130** | 0.706188 | VLVGAHLHK |
| **130** | 0.706188 | LKVLPNHPW |
| **130** | 0.706188 | VTGKAVAVV |
| **130** | 0.706188 | FASSNKVLM |
| **130** | 0.706188 | KNLFFAAPV |
| **135** | 0.705631 | LLVRAEK |
| **135** | 0.705631 | HKLPLSL |
| **135** | 0.705631 | QLLLPTR |
| **135** | 0.705631 | LQGRSLF |
| **135** | 0.705631 | HLLKPPM |
| **135** | 0.705631 | LLHAMRN |
| **135** | 0.705631 | MMNNRVS |
| **135** | 0.705631 | HRLPLLS |
| **135** | 0.705631 | VGLTWSR |
| **135** | 0.705631 | RGVPFPM |
| **135** | 0.705631 | VKSTSVV |
| **135** | 0.705631 | KAALMSF |
| **135** | 0.705631 | FVVPSSK |
| **135** | 0.705631 | WRFMNPN |
| **149** | 0.703761 | DRLRL |
| **149** | 0.703761 | FVRHQ |
| **149** | 0.703761 | VNRMH |
| **149** | 0.703761 | MTHLR |
| **149** | 0.703761 | VAGAVLKPPL |
| **149** | 0.703761 | MVVTARNYVN |
| **149** | 0.703761 | VLALRGGAAW |
| **149** | 0.703761 | KVVKMDNQPL |
| **149** | 0.703761 | YPGVGMVHSMGVVPK |
| **149** | 0.703761 | LRREF |
| **159** | 0.702351 | MMYNPGVK |
| **159** | 0.702351 | KLGSALLA |
| **159** | 0.702351 | WKTLFPNS |
| **162** | 0.700815 | MMGKVGVEGAR |
| **162** | 0.700815 | KLKSENDFGVGKLV |
| **162** | 0.700815 | NMKAEGPMTLLFGK |
| **162** | 0.700815 | FPGPLVAGGKW |
| **162** | 0.700815 | LLGGVSYASKF |
| **162** | 0.700815 | RSVGFLGGPFG |
| **162** | 0.700815 | LRGMAANAPLPGLF |
| **169** | 0.69828 | HVRLPN |
| **169** | 0.69828 | FLQQRN |
| **169** | 0.69828 | RLARLD |
| **169** | 0.69828 | NRLSTV |
| **169** | 0.69828 | FLQNRT |
| **169** | 0.69828 | NRPMAF |
| **169** | 0.69828 | SVAAGVNKV |
| **169** | 0.69828 | LVSGPYMAGVKP |
| **169** | 0.69828 | MKNANVVMTPPN |
| **169** | 0.69828 | FVDVGHKAR |
| **169** | 0.69828 | ENRLRL |
| **169** | 0.69828 | WLASPVGGK |
| **169** | 0.69828 | MEKRGSVLA |
| **169** | 0.69828 | EVKSVR |
| **169** | 0.69828 | VLARNH |
| **169** | 0.69828 | PELLKPPLR |
| **169** | 0.69828 | ARTPNMLGVGPL |
| **169** | 0.69828 | WGMALAPSGAVK |
| **169** | 0.69828 | LLAPGTKQL |
| **169** | 0.69828 | MVTSTGFAK |
| **169** | 0.69828 | FAAVVPGNK |
| **169** | 0.69828 | WGPLHGGRW |
| **191** | 0.696443 | NKDVVLVAASPKP |
| **191** | 0.696443 | RSLAAAMDLGARW |
| **191** | 0.696443 | HTLAVKGFNPAPF |
| **194** | 0.695483 | HSAKVLAVPP |
| **194** | 0.695483 | VVAGGAMYSK |
| **194** | 0.695483 | HTVLAYGPKF |
| **194** | 0.695483 | RLHSAAPLPL |
| **194** | 0.695483 | WAQMTKSNHM |
| **199** | 0.694494 | VNSHKLP |
| **199** | 0.694494 | LPRAPHW |
| **199** | 0.694494 | LAGRSAL |
| **199** | 0.694494 | KVATPVN |
| **199** | 0.694494 | FVDRHKQ |
| **199** | 0.694494 | NVNGQRV |
| **199** | 0.694494 | KGPPVVY |
| **199** | 0.694494 | VKNLHPP |
| **199** | 0.694494 | FSSSVYK |
| **199** | 0.694494 | FLPSRRD |
| **199** | 0.694494 | WHPMAGK |
| **199** | 0.694494 | MRNNMAG |
| **199** | 0.694494 | KGPFPAL |
| **199** | 0.694494 | MAHAVHR |
| **214** | 0.692439 | VAGGGSSKAVL |
| **214** | 0.692439 | MDVQAKMAGAR |
| **214** | 0.692439 | LVFHTKC |
| **214** | 0.692439 | VLNGALPHAPR |
| **214** | 0.692439 | MPFPGTAALSR |
| **214** | 0.692439 | RSFSFFGGESK |
| **214** | 0.692439 | TTTGNFVYALR |
| **221** | 0.690282 | LAGGRLPH |
| **221** | 0.690282 | RNYVPLEK |
| **221** | 0.690282 | SGVAVAPR |
| **221** | 0.690282 | LSAVGAPR |
| **221** | 0.690282 | WAKNHGSL |
| **221** | 0.690282 | FFSGSRSS |
| **221** | 0.690282 | VVNNGHSK |
| **221** | 0.690282 | VGSTLGPR |
| **221** | 0.690282 | MNKAEGLAKLNY |
| **221** | 0.690282 | AVQVGGRT |
| **221** | 0.690282 | KNAVSVGP |
| **221** | 0.690282 | KHSPGAVM |
| **221** | 0.690282 | RGSRDLPL |
| **234** | 0.689167 | FLTNGCADKVLYK |
| **235** | 0.688029 | RSVGAGGTAVSPL |
| **236** | 0.686868 | VLSGHYANK |
| **236** | 0.686868 | VVNHATPSR |
| **236** | 0.686868 | TKNLWGGPP |
| **236** | 0.686868 | STLNKGTLA |
| **236** | 0.686868 | RGQVPGVGQ |
| **236** | 0.686868 | KGGGFFAPN |
| **242** | 0.684483 | RFNDR |
| **242** | 0.684483 | LSVNNNNHKS |
| **242** | 0.684483 | VVKGAGGTYG |
| **242** | 0.684483 | LYNPR |
| **242** | 0.684483 | RVAGEALQTR |
| **242** | 0.684483 | LQPRY |
| **242** | 0.684483 | RLSGNPNNAL |
| **242** | 0.684483 | KPNGHTPMNW |
| **242** | 0.684483 | HMNSGGPKGTLMPNS |
| **242** | 0.684483 | TVGLPGAKST |
| **252** | 0.682017 | MPKATTNAKNL |
| **252** | 0.682017 | LDKASGGAKNL |
| **252** | 0.682017 | REGGSANVGLR |
| **252** | 0.682017 | LTATHGNTAFK |
| **252** | 0.682017 | KFATHVHGQGS |
| **257** | 0.680756 | LYNNKY |
| **257** | 0.680756 | RFAAPH |
| **257** | 0.680756 | FYTHRT |
| **257** | 0.680756 | LYNPRG |
| **257** | 0.680756 | FGRERP |
| **257** | 0.680756 | DSKLRN |
| **257** | 0.680756 | RAHHLP |
| **257** | 0.680756 | WNDLNHKSNKNN |
| **257** | 0.680756 | LYNPRN |
| **257** | 0.680756 | RADKPV |
| **257** | 0.680756 | FSPSQR |
| **257** | 0.680756 | KTAFAH |
| **257** | 0.680756 | MQRLNPGPTNNKNEKEFN |
| **257** | 0.680756 | NSHKLP |
| **257** | 0.680756 | ARGPAEVPPRLQ |
| **272** | 0.678181 | QKQDPVMKNPQQH |
| **272** | 0.678181 | LSLPGGYHPAAPK |
| **272** | 0.678181 | ALSLATTTHPRPN |
| **275** | 0.676868 | ANLYNPR |
| **275** | 0.676868 | HKVQPGQ |
| **275** | 0.676868 | LQQKGER |
| **275** | 0.676868 | RTDPLQK |
| **275** | 0.676868 | YVGEKTK |
| **275** | 0.676868 | KTFYPQQ |
| **275** | 0.676868 | FSGSSSR |
| **275** | 0.676868 | ACKSAEKGTLFPN |
| **275** | 0.676868 | LSPGAKH |
| **275** | 0.676868 | HRKVESH |
| **275** | 0.676868 | LTGHKAP |
| **275** | 0.676868 | RAALAQT |
| **275** | 0.676868 | KLAATHN |
| **275** | 0.676868 | LSNNKPT |
| **275** | 0.676868 | RAPGAVT |
| **275** | 0.676868 | KAEDKVK |
| **275** | 0.676868 | AVGANRP |
| **275** | 0.676868 | NSSFATR |
| **275** | 0.676868 | RTVAAHQ |
| **275** | 0.676868 | RTPPHHL |
| **275** | 0.676868 | GSKGGLPLDPQPRP |
| **275** | 0.676868 | PNQHGRL |
| **275** | 0.676868 | WGGSQSR |
| **275** | 0.676868 | LKRGGEH |
| **275** | 0.676868 | TTAKGPV |
| **275** | 0.676868 | ASGSVRP |
| **301** | 0.675541 | KVGGQTAQ |
| **301** | 0.675541 | LNQGGPRS |
| **301** | 0.675541 | QFGDRHQK |
| **301** | 0.675541 | SGRSPAAM |
| **301** | 0.675541 | LRSNEASK |
| **301** | 0.675541 | TLSRGAST |
| **301** | 0.675541 | KFNPDQPK |
| **301** | 0.675541 | RGGNAGTL |
| **301** | 0.675541 | VQNNPSAR |
| **301** | 0.675541 | RESHGVGK |
| **301** | 0.675541 | NYHNPPRL |
| **301** | 0.675541 | WGNGTSKN |
| **301** | 0.675541 | NKGAGAGV |
| **314** | 0.672841 | YKASNSGSW |
| **314** | 0.672841 | FATPPASSK |
| **314** | 0.672841 | QRAKGALPE |
| **314** | 0.672841 | QGAKSGLGY |
| **314** | 0.672841 | SANHGVPPR |
| **314** | 0.672841 | LTHSSARHS |
| **314** | 0.672841 | EAALASSGN |
| **314** | 0.672841 | RGTPLSGAH |
| **314** | 0.672841 | WHAGRGAPSHGAGGMTQNH |
| **314** | 0.672841 | SQAGFNTTR |
| **314** | 0.672841 | RHNNPALQP |
| **314** | 0.672841 | KHAKGEGWP |
| **326** | 0.671472 | RHQEMARDPR |
| **326** | 0.671472 | TGKEPMPYAK |
| **326** | 0.671472 | VHAGATPANK |
| **326** | 0.671472 | RLSSANTGPQ |
| **326** | 0.671472 | TMAHAPAATR |
| **332** | 0.67009 | KYGSGASGSWQ |
| **332** | 0.67009 | GRMAADARREA |
| **332** | 0.67009 | VDGGSSRGSTR |
| **335** | 0.668696 | WNSAKDAAASAK |
| **336** | 0.667291 | LAGGGPNNAGKEQKQ |
| **337** | 0.657214 | YNNKY |
| **337** | 0.657214 | SKKAGGAGEY |
| **337** | 0.657214 | YKNSGSA |
| **337** | 0.657214 | HYKPAN |
| **337** | 0.657214 | NRGAPPH |
| **337** | 0.657214 | YTNAPR |
| **337** | 0.657214 | RENHPPR |
| **337** | 0.657214 | RGAPGTTGPHPTHNQ |
| **337** | 0.657214 | YGAGK |
| **337** | 0.657214 | KKGPGNAAD |
| **337** | 0.657214 | RSTGAGPGER |
| **337** | 0.657214 | HAAATGGHK |
| **337** | 0.657214 | QGAHPR |
| **337** | 0.657214 | PSSHNPTGR |
| **337** | 0.657214 | TPAGPNGHSK |
| **337** | 0.657214 | NPGAKGH |
| **353** | 0.613548 | KVVDMH |
| **353** | 0.613548 | LFAPHW |
| **353** | 0.613548 | LDMNAGLMKV |
| **353** | 0.613548 | LLVRAE |
| **353** | 0.613548 | VFSNHMSF |
| **353** | 0.613548 | MWLHSP |
| **353** | 0.613548 | WFDGQVVWGK |
| **353** | 0.613548 | NVVNMH |
| **353** | 0.613548 | MAGLGVLAAM |
| **353** | 0.613548 | SVLHLTGF |
| **353** | 0.613548 | VMENLGGKMV |
| **353** | 0.613548 | DMLTLK |
| **353** | 0.613548 | NNGFLGML |
| **353** | 0.613548 | MMLAHEMK |
| **353** | 0.613548 | HVSSHLVM |
| **353** | 0.613548 | MVGSMAAV |
| **353** | 0.613548 | QVWLGH |
| **353** | 0.613548 | FVYMMPNSGLLA |
| **353** | 0.613548 | YLVSSLVHFNAL |
| **353** | 0.613548 | LKNDNLLL |
| **353** | 0.613548 | MVKDSVLGVT |
| **353** | 0.613548 | YNGLMM |
| **353** | 0.613548 | VLPPSSVL |
| **353** | 0.613548 | FLGYFAMN |
| **353** | 0.613548 | LMGNGSLLLPAPVV |
| **378** | 0.61137 | WMTAHLTFDLLPR |
| **380** | 0.610781 | LMMAHSGPPLM |
| **380** | 0.610781 | MPAELRGVAVL |
| **382** | 0.610175 | DMHLRPLLS |
| **382** | 0.610175 | SVLSTMLSH |
| **382** | 0.610175 | GPLVLVETR |
| **382** | 0.610175 | NSVLDLLQR |
| **382** | 0.610175 | HPPVVVANV |
| **382** | 0.610175 | FTLGHGSLV |
| **382** | 0.610175 | FLVGSHEWR |
| **389** | 0.609552 | LLAAMTT |
| **389** | 0.609552 | YVSPVFQ |
| **389** | 0.609552 | FAGFEFK |
| **389** | 0.609552 | LYSGHML |
| **389** | 0.609552 | MMNDRVS |
| **389** | 0.609552 | VAVLSAN |
| **389** | 0.609552 | FWNPVST |
| **389** | 0.609552 | NLSTLLT |
| **389** | 0.609552 | DLRVNYW |
| **389** | 0.609552 | LLPHGAV |
| **389** | 0.609552 | VMSTSVT |
| **389** | 0.609552 | GYGVLMN |
| **389** | 0.609552 | MYSLGLP |
| **389** | 0.609552 | WAAMGVT |
| **389** | 0.609552 | FSVNNGV |
| **389** | 0.609552 | VTMLTPP |
| **389** | 0.609552 | HLTMNGV |
| **389** | 0.609552 | LTTQGLM |
| **389** | 0.609552 | HLPAVGF |
| **408** | 0.608912 | MMNNGVVSKGDM |
| **408** | 0.608912 | VTKGEVVAGTVV |
| **408** | 0.608912 | YVMSTMHTLFPN |
| **408** | 0.608912 | TLVPVPLAPPLP |
| **412** | 0.607582 | VTQWAKVELVDHKMN |
| **412** | 0.607582 | FLAGAVAASW |
| **412** | 0.607582 | LKTAVMGVGE |
| **412** | 0.607582 | FPSLMLAKEA |
| **412** | 0.607582 | VFGPAAATMM |
| **412** | 0.607582 | LRQSWGVSEF |
| **412** | 0.607582 | VVAQAPVFGH |
| **412** | 0.607582 | VVANA |
| **412** | 0.607582 | FSVVGVPDKH |
| **412** | 0.607582 | LVAAG |
| **412** | 0.607582 | DMPLKLVAPN |
| **412** | 0.607582 | MQGVALSVGQ |
| **412** | 0.607582 | TTMSNLLGSM |
| **412** | 0.607582 | RGFPLPDVGL |
| **412** | 0.607582 | RLAMGPVEAL |
| **412** | 0.607582 | LFLDVHNRPH |
| **412** | 0.607582 | LVVVHYAPTP |
| **412** | 0.607582 | LVGPWAERGL |
| **430** | 0.606187 | SSVLPPNL |
| **430** | 0.606187 | MMAMAEKTGLFPN |
| **430** | 0.606187 | FEQGSRVL |
| **430** | 0.606187 | LDMHNHVK |
| **430** | 0.606187 | VVVTNNGP |
| **430** | 0.606187 | YLVTGNGV |
| **430** | 0.606187 | VVDAHQWK |
| **430** | 0.606187 | YYGGVLPL |
| **430** | 0.606187 | MFAETKTM |
| **430** | 0.606187 | STTVLASV |
| **430** | 0.606187 | HPLALSVT |
| **430** | 0.606187 | YTMALSLH |
| **430** | 0.606187 | LVAAAADVAVVPK |
| **430** | 0.606187 | TLGYFGLP |
| **430** | 0.606187 | HALAMGSV |
| **430** | 0.606187 | WNGSGGGLGLLLY |
| **430** | 0.606187 | AQAPTVLF |
| **430** | 0.606187 | FLAMGAAP |
| **448** | 0.604729 | MPHSSALFGLY |
| **448** | 0.604729 | MKMQQHLTDGM |
| **448** | 0.604729 | LVLTAVSHGAH |
| **448** | 0.604729 | MMLASTKADLFPNS |
| **448** | 0.604729 | WPPGMAFWTYLHDK |
| **448** | 0.604729 | WLSLLEANSHK |
| **448** | 0.604729 | YPGPLANVPVL |
| **455** | 0.602429 | SFVDRH |
| **455** | 0.602429 | LKFQSE |
| **455** | 0.602429 | SMLSPH |
| **455** | 0.602429 | VEHKQV |
| **455** | 0.602429 | LQGREF |
| **455** | 0.602429 | FQKGDV |
| **455** | 0.602429 | VLGGPPGGHGLF |
| **455** | 0.602429 | FRVADH |
| **455** | 0.602429 | FLNMSAEKGTLFPNS |
| **455** | 0.602429 | NLKEGGGLF |
| **455** | 0.602429 | LRFHGE |
| **455** | 0.602429 | DMHRLP |
| **455** | 0.602429 | VLALPSTTLSAS |
| **455** | 0.602429 | HPLNSFSLQ |
| **455** | 0.602429 | DLKHMP |
| **455** | 0.602429 | NGASAALLM |
| **455** | 0.602429 | SMLSPH |
| **455** | 0.602429 | SPLVNH |
| **455** | 0.602429 | SSSLAGPPALLL |
| **455** | 0.602429 | WGAAGFLLAPGGVAH |
| **455** | 0.602429 | MQTYLNLCMV |
| **455** | 0.602429 | PVAMGMPGH |
| **455** | 0.602429 | FTSFAT |
| **455** | 0.602429 | TTVLAPPALNVS |
| **455** | 0.602429 | FYPSLP |
| **455** | 0.602429 | MALSLGPPT |
| **455** | 0.602429 | FPQYLAGLY |
| **455** | 0.602429 | MGSSGFVGP |
| **455** | 0.602429 | SMWEPPSAMLKS |
| **455** | 0.602429 | QNAAMNVMH |
| **455** | 0.602429 | MPLVNPAGGQTM |
| **455** | 0.602429 | FASGLDLTK |
| **455** | 0.602429 | ELD |
| **455** | 0.602429 | MNRDAM |
| **489** | 0.600823 | LRAPNGAESPVMW |
| **489** | 0.600823 | VVSTLPAHGAALP |
| **489** | 0.600823 | MGGPLGQGVLGTS |
| **489** | 0.600823 | MMPANTTSKGDMF |
| **493** | 0.6 | RLPPTMALSE |
| **493** | 0.6 | FVDAKNSHTV |
| **493** | 0.6 | LYSGPPSSLW |
| **493** | 0.6 | MSALAACLFGLQ |
| **493** | 0.6 | HRVTPEVSGV |
| **493** | 0.6 | WPVANLDKGH |
| **493** | 0.6 | FLKQMGTDSS |
| **493** | 0.6 | DLKGSAALLN |
| **493** | 0.6 | WPAPAVAPYF |
| **493** | 0.6 | LPVGSHALTY |
| **493** | 0.6 | FVNHDSLRGH |
| **493** | 0.6 | HRSDAAFTMV |
| **493** | 0.6 | NPPLNFASNV |
| **506** | 0.599163 | FNVDGQR |
| **506** | 0.599163 | LTADNRL |
| **506** | 0.599163 | QLLAGPH |
| **506** | 0.599163 | SVALTSY |
| **506** | 0.599163 | RVSQGDM |
| **506** | 0.599163 | VVEQRGH |
| **506** | 0.599163 | LVTTSGY |
| **506** | 0.599163 | HLAVTNN |
| **506** | 0.599163 | ARVGDLH |
| **506** | 0.599163 | QVAGVHP |
| **506** | 0.599163 | QNAMLAH |
| **506** | 0.599163 | VHPAREV |
| **506** | 0.599163 | LTTTASF |
| **506** | 0.599163 | ESSSMLK |
| **506** | 0.599163 | WAGVDGR |
| **506** | 0.599163 | QNLHSGV |
| **506** | 0.599163 | HPPMLST |
| **506** | 0.599163 | PVPAHPL |
| **506** | 0.599163 | LDMSAEKGTLMAAR |
| **506** | 0.599163 | VLSNGNS |
| **506** | 0.599163 | RSSADVV |
| **506** | 0.599163 | QPAVLHQ |
| **528** | 0.597452 | WNDLNHKSNQL |
| **528** | 0.597452 | LSLSSSLHPNP |
| **528** | 0.597452 | RDGMATSVSSV |
| **528** | 0.597452 | LTFAGPGGNTL |
| **528** | 0.597452 | NVNALPAVPPP |
| **528** | 0.597452 | SFNGGMHADLR |
| **528** | 0.597452 | KLVPYPDPMNH |
| **528** | 0.597452 | WGGGLGAHVRD |
| **537** | 0.595692 | VKENLDRA |
| **537** | 0.595692 | KVMGDPAN |
| **537** | 0.595692 | MQSWHTNY |
| **537** | 0.595692 | RDTVAGSL |
| **537** | 0.595692 | TNLENKVGNANL |
| **537** | 0.595692 | FFSRGESTAPPF |
| **537** | 0.595692 | LNQGAGVP |
| **537** | 0.595692 | LHVHGSAH |
| **537** | 0.595692 | AVGAHMER |
| **537** | 0.595692 | HLAMYSNA |
| **537** | 0.595692 | YNAAMASL |
| **537** | 0.595692 | VTVGGTQQASVT |
| **537** | 0.595692 | YSTSHGLL |
| **537** | 0.595692 | VAALAGAH |
| **537** | 0.595692 | VASAAPLT |
| **537** | 0.595692 | LTGP |
| **537** | 0.595692 | FAED |
| **537** | 0.595692 | NMGFAGNN |
| **537** | 0.595692 | EASL |
| **537** | 0.595692 | DHMGVAPR |
| **537** | 0.595692 | LSPGAMNY |
| **537** | 0.595692 | SLPAPMLANSPP |
| **537** | 0.595692 | QSTLGGALVGEK |
| **537** | 0.595692 | LDGTVQAR |
| **537** | 0.595692 | HNSQNNLL |
| **537** | 0.595692 | LPRH |
| **537** | 0.595692 | FSTD |
| **537** | 0.595692 | KPPDMSSL |
| **537** | 0.595692 | LSPAVGPP |
| **566** | 0.593886 | MPTGSELNKLNHT |
| **566** | 0.593886 | MMDGKSNNSADKV |
| **566** | 0.593886 | GWKAASVPETLQN |
| **566** | 0.593886 | WLPSLESQKKGEMC |
| **566** | 0.593886 | AMELRPGGGGTYV |
| **571** | 0.592967 | WARLGTEGY |
| **571** | 0.592967 | EGLQVGSRA |
| **571** | 0.592967 | EAVVAGSNK |
| **571** | 0.592967 | YPGNALGLP |
| **571** | 0.592967 | AAYVTTVAQ |
| **571** | 0.592967 | NNTSVVEAK |
| **571** | 0.592967 | FVQNPQAGH |
| **571** | 0.592967 | WTYNPGLSS |
| **571** | 0.592967 | MVAGPTGGQ |
| **571** | 0.592967 | KGALGVGDT |
| **571** | 0.592967 | VSTGANVGQ |
| **571** | 0.592967 | HPPSQGVSF |
| **583** | 0.592038 | VQVMPANGSTAARE |
| **583** | 0.592038 | LAPPCL |
| **585** | 0.5911 | FYMPGEERKN |
| **585** | 0.5911 | MPQQVETSAR |
| **585** | 0.5911 | ETSSGGGATKVVVPP |
| **585** | 0.5911 | PAPPAAFAMH |
| **585** | 0.5911 | DAGAFGQPVK |
| **585** | 0.5911 | KFNGNDNYTWHAAFY |
| **585** | 0.5911 | KLTDDDMRGK |
| **585** | 0.5911 | LKDDTGGLKY |
| **585** | 0.5911 | KPPLDFAADK |
| **585** | 0.5911 | NPGGVGGVGH |
| **585** | 0.5911 | FQSPATDAKW |
| **596** | 0.590152 | TLNHFCAA |
| **596** | 0.590152 | RNTLAGNLESGGVTHT |
| **596** | 0.590152 | NPPLNFASNV |
| **599** | 0.589195 | FSGGNPPGPVS |
| **599** | 0.589195 | YTGPAPNPSVV |
| **599** | 0.589195 | RDNRNAQNLDGFCM |
| **599** | 0.589195 | HPAATGTLMPH |
| **599** | 0.589195 | QGGGGGVPLNP |
| **599** | 0.589195 | HEGGAFGGFYR |
| **599** | 0.589195 | LDAGAASLRQS |
| **606** | 0.58823 | FSTDRH |
| **606** | 0.58823 | HLAEGR |
| **606** | 0.58823 | NDLNHQ |
| **606** | 0.58823 | LYDQRP |
| **606** | 0.58823 | AGRTEF |
| **606** | 0.58823 | FTGVKKTKEGED |
| **606** | 0.58823 | YAVADK |
| **606** | 0.58823 | HPPFSWAKDPPT |
| **606** | 0.58823 | PMKNGHEDLTHK |
| **606** | 0.58823 | YVGEKT |
| **606** | 0.58823 | FAATTY |
| **606** | 0.58823 | FRDDRH |
| **606** | 0.58823 | WGGSGAAMEGPR |
| **606** | 0.58823 | YVHDTDMARPTR |
| **606** | 0.58823 | WGGSGAAMEGPR |
| **606** | 0.58823 | YVHDTDMARPTR |
| **622** | 0.586275 | RLTNVENQQAHPH |
| **623** | 0.585287 | LAANPDR |
| **623** | 0.585287 | SNQEVHK |
| **623** | 0.585287 | HPTGGGF |
| **623** | 0.585287 | LTREEAK |
| **623** | 0.585287 | LSAHAPP |
| **623** | 0.585287 | VDSPSRA |
| **623** | 0.585287 | NVSTAQN |
| **623** | 0.585287 | NVSKGPE |
| **623** | 0.585287 | NLNHSTP |
| **623** | 0.585287 | LPAAAHQ |
| **623** | 0.585287 | NPGPFTT |
| **623** | 0.585287 | PLGAAHN |
| **623** | 0.585287 | AGAHNAM |
| **623** | 0.585287 | NPGPNHF |
| **623** | 0.585287 | NNGALPQ |
| **623** | 0.585287 | NGGLAQT |
| **623** | 0.585287 | RMCSEQ |
| **623** | 0.585287 | YGAGGNNPASNVMA |
| **623** | 0.585287 | KCAPPPDHLVAQAQ |
| **623** | 0.585287 | KSGGDVP |
| **623** | 0.585287 | YGDRLAT |
| **623** | 0.585287 | SHVTASSGSGLHAQ |
| **645** | 0.584293 | AFHRTPPE |
| **645** | 0.584293 | ARLDEPSR |
| **645** | 0.584293 | NQLDQNPR |
| **645** | 0.584293 | QLNNSNNANQLDQNRP |
| **645** | 0.584293 | HGSSGVGH |
| **645** | 0.584293 | DRLHPTPN |
| **645** | 0.584293 | KEGGLARD |
| **645** | 0.584293 | RANTNPVD |
| **645** | 0.584293 | WATAAHGT |
| **645** | 0.584293 | EGHLPKGH |
| **645** | 0.584293 | FASTYAGP |
| **645** | 0.584293 | FSSGAGTQ |
| **645** | 0.584293 | PMGASAGAAPGGFYT |
| **645** | 0.584293 | RSAVEGAH |
| **645** | 0.584293 | NATPAGVH |
| **645** | 0.584293 | HAVAPGGT |
| **645** | 0.584293 | NNGGLAGP |
| **662** | 0.583292 | HMKGTGADTTGFGTGGT |
| **662** | 0.583292 | MEHCAKPTS |
| **662** | 0.583292 | RWGAHADTYAQLHGSYN |
| **665** | 0.582285 | HTFGNAPAH |
| **665** | 0.582285 | AQRPELAQQ |
| **665** | 0.582285 | APAQEQMQR |
| **665** | 0.582285 | APAAGVTNY |
| **665** | 0.582285 | ENLNNPSRA |
| **665** | 0.582285 | QNGAAVGPP |
| **665** | 0.582285 | MGGASAKGE |
| **665** | 0.582285 | VGGSGANSH |
| **673** | 0.581272 | LAGSEQPASK |
| **673** | 0.581272 | AAGAALNSPH |
| **673** | 0.581272 | LTTPASNQAH |
| **673** | 0.581272 | HPGGMAQAAH |
| **673** | 0.581272 | TPAAAHAWGQ |
| **678** | 0.580255 | LAGSEQAPSKS |
| **678** | 0.580255 | YNGSAPPPTGF |
| **678** | 0.580255 | EPPGSDLRAPK |
| **678** | 0.580255 | QTGTAGGAMGQ |
| **678** | 0.580255 | TQTAMPAASST |
| **678** | 0.580255 | RLKGGAEDEGR |
| **678** | 0.580255 | DLGRSADNPPR |
| **685** | 0.578208 | YLAGSEPKASQSEKT |
| **685** | 0.578208 | NGPKSLESQQQGEK |
| **685** | 0.578208 | LAGSEPQASKSEKT |
| **688** | 0.577178 | DPKDNSNPTTQLNQNPR |
| **688** | 0.577178 | QRAPNADGQEKQKELQ |
| **690** | 0.570946 | YSRQET |
| **690** | 0.570946 | EARPEK |
| **690** | 0.570946 | NPGTHNP |
| **690** | 0.570946 | NAREPS |
| **690** | 0.570946 | NKAPYTE |
| **690** | 0.570946 | AANPGPTGH |
| **690** | 0.570946 | NYHNPP |
| **690** | 0.570946 | HHDAKH |
| **690** | 0.570946 | YAKTNDGQ |
| **690** | 0.570946 | EANPPPK |
| **690** | 0.570946 | KDTTPEK |
| **690** | 0.570946 | EAGEPRSGASR |
| **690** | 0.570946 | TGRETP |
| **690** | 0.570946 | DYHPNPR |
| **690** | 0.570946 | RPYSSE |
| **690** | 0.570946 | GRDSPGKE |
| **690** | 0.570946 | HTGKAAYNAEA |
| **690** | 0.570946 | PAQEYRN |
| **690** | 0.570946 | HPPTAPH |
| **690** | 0.570946 | KDAPAGAGH |
| **690** | 0.570946 | RPGDAGAAH |
| **690** | 0.570946 | KAPAHGDQ |
| **690** | 0.570946 | TTGT |
| **690** | 0.570946 | KPAAGGGET |
| **690** | 0.570946 | NTAKYD |
| **715** | 0.519956 | WFDSVVKE |
| **715** | 0.519956 | VELVNH |
| **715** | 0.519956 | LASVVDVT |
| **715** | 0.519956 | QNMGFEWV |
| **715** | 0.519956 | VMMEYVTAVP |
| **715** | 0.519956 | NGMGFEWV |
| **715** | 0.519956 | FVENPPVF |
| **715** | 0.519956 | FGMFVNLHAE |
| **715** | 0.519956 | LFSVTE |
| **715** | 0.519956 | FLLPAD |
| **715** | 0.519956 | WVAVPVLVEGAELK |
| **715** | 0.519956 | HVLLADVGPF |
| **715** | 0.519956 | EGAFVMGV |
| **715** | 0.519956 | FMNFARDFDM |
| **729** | 0.516188 | LMGGVNSLPDV |
| **729** | 0.516188 | PMGSLFMGYDF |
| **729** | 0.516188 | WFPVDAQQSVL |
| **732** | 0.515416 | MMEYVASLP |
| **732** | 0.515416 | LALDLNMPY |
| **732** | 0.515416 | GLPLPDVPF |
| **732** | 0.515416 | MVNTDSWLT |
| **736** | 0.514639 | FDHGLLP |
| **736** | 0.514639 | VEGSLLQ |
| **736** | 0.514639 | LVETTLT |
| **736** | 0.514639 | VFDGGAVGVEGKVL |
| **736** | 0.514639 | MVQDRVD |
| **736** | 0.514639 | LMGVGFDAGTLFPN |
| **736** | 0.514639 | RLAPDFMFVEVNSH |
| **736** | 0.514639 | NFNAGYLGEVHLLL |
| **744** | 0.513856 | FEGAVGSGVLAL |
| **744** | 0.513856 | MVSDGVSLRQME |
| **744** | 0.513856 | TLVPGGDFTVSW |
| **747** | 0.512275 | MTPPMDTLLP |
| **747** | 0.512275 | AQAGPMLMEM |
| **747** | 0.512275 | WAPVLTVGAE |
| **747** | 0.512275 | VPAVDGGVLH |
| **747** | 0.512275 | EVPLVGVANA |
| **747** | 0.512275 | EVPLVGVANA |
| **753** | 0.510676 | AKVELVDH |
| **753** | 0.510676 | DGGGLFSF |
| **753** | 0.510676 | LRAVENEV |
| **753** | 0.510676 | VDLLGSPP |
| **753** | 0.510676 | VAHLDTVS |
| **753** | 0.510676 | DLCVLLPF |
| **753** | 0.510676 | EWMLVSDLKPYYS |
| **753** | 0.510676 | DVAGLANV |
| **753** | 0.510676 | YLAVGSMFNVSQE |
| **753** | 0.510676 | HPGVVQLE |
| **764** | 0.509061 | WFDGEVREGKM |
| **764** | 0.509061 | LEPQSMNVLQQGAW |
| **764** | 0.509061 | SEKDVKVPEVL |
| **764** | 0.509061 | DFASGSLAHMM |
| **764** | 0.509061 | PLLAAMMDSGSTYV |
| **769** | 0.508248 | MMVVEDTCALLK |
| **771** | 0.506613 | VFEDRH |
| **771** | 0.506613 | WFVNEETAR |
| **771** | 0.506613 | LNLDEPSRW |
| **771** | 0.506613 | NNASLLLYE |
| **771** | 0.506613 | FGHELLSPP |
| **771** | 0.506613 | HTLSDMEKF |
| **771** | 0.506613 | MDALATHLP |
| **771** | 0.506613 | LSAMDLTQETAGVKL |
| **771** | 0.506613 | LVGLMHAGSHSD |
| **771** | 0.506613 | DKFDSV |
| **771** | 0.506613 | VGAMGDSTL |
| **771** | 0.506613 | FTGVGAESNFLH |
| **771** | 0.506613 | VVAGAGGAESMF |
| **771** | 0.506613 | MFTTGDVAQLHS |
| **771** | 0.506613 | WQVLAQGHD |
| **771** | 0.506613 | PSVLTVASE |
| **771** | 0.506613 | MLAAMDKAGAGGELL |
| **771** | 0.506613 | EAVGVHVAPLGH |
| **771** | 0.506613 | WTSEPPAFAMAV |
| **790** | 0.504969 | LTVASGDPTLAGW |
| **790** | 0.504969 | EALSNKAVHLLTE |
| **790** | 0.504969 | YVAPAMNSQGDMF |
| **793** | 0.504144 | MPSVGNVGAE |
| **793** | 0.504144 | MASAPNLTEF |
| **793** | 0.504144 | FGEPHVGAHW |
| **793** | 0.504144 | MTVDYAKNEL |
| **793** | 0.504144 | FHNMDADRHM |
| **798** | 0.503317 | MDMSAEK |
| **798** | 0.503317 | FNVDRET |
| **798** | 0.503317 | EVGHAFP |
| **798** | 0.503317 | LNGTELQ |
| **798** | 0.503317 | LDMSAEK |
| **798** | 0.503317 | EGTALNL |
| **798** | 0.503317 | YLGVNET |
| **798** | 0.503317 | TELAASAYASVLPL |
| **798** | 0.503317 | WEMAAPP |
| **798** | 0.503317 | MMGGDVGVSKGDPY |
| **798** | 0.503317 | SVNVEHN |
| **798** | 0.503317 | EASLLAN |
| **798** | 0.503317 | EANLHQF |
| **798** | 0.503317 | MLKGGAMEGTLAEA |
| **812** | 0.50166 | MKSTEEERGLW |
| **812** | 0.50166 | LTGEGYKEMVN |
| **812** | 0.50166 | WVNMAHGEARE |
| **812** | 0.50166 | MLKQEGHDVST |
| **812** | 0.50166 | HDVAVTNVTQY |
| **812** | 0.50166 | EVAGAGEVVTR |
| **812** | 0.50166 | TLVSMDTSGGP |
| **812** | 0.50166 | VFGGGGTADFVTYHP |
| **820** | 0.5 | YALDLGNNNNGALDKF |
| **820** | 0.5 | AETFSVGP |
| **820** | 0.5 | LLGPGYEQ |
| **820** | 0.5 | SMLPSPEP |
| **820** | 0.5 | WGPRDSFE |
| **820** | 0.5 | CASGFEWV |
| **820** | 0.5 | FEANFTHNQKEF |
| **820** | 0.5 | DHATAFVSNGGF |
| **820** | 0.5 | MELGTAPP |
| **820** | 0.5 | YVLANLDAGERQ |
| **820** | 0.5 | AETGQLMH |
| **820** | 0.5 | MQSTSNGVGELG |
| **820** | 0.5 | FGPSGMAALSSE |
